# Supplementary material for: Computational insights into non-C2-symmetric BINOLate titanium catalyzed cyanation of aldehydes
Source: Royal Society of Chemistry journal article supplement (doi:10.1039/d4nj02824d), 2024-01-01
Supplement: d4nj02824d1.pdf [file d4nj02824d1.pdf]

Supporting Information

# Computational Insights into Non- $C_2$ -Symmetric BINOLate Titanium Catalyzed Hydrocyanation of Aldehydes

Dongfeng Huang,<sup>\*,†</sup> and Haili Hou<sup>†</sup>

*a. College of Chemistry and Chemical Engineering, Anyang Normal University, Anyang, Henan 455000, China; HeNan Province Key  
Laboratory of New Opto-electronic Functional Materials, Anyang, Henan 455000, China.*

RECEIVED DATE (automatically inserted by publisher);  
E-mail: hdf1101@aynu.edu.cn

**CONTENTS:**

|                                                                                         |    |
|-----------------------------------------------------------------------------------------|----|
| Figure S1-S9 .....                                                                      | 2  |
| XYZ coordinates, $E_{ZPE}$ (in gas phase) and Gibbs free energies (in $CH_2Cl_2$ )..... | 7  |
| Full citation of reference 14.....                                                      | 84 |

Figure S1-S9

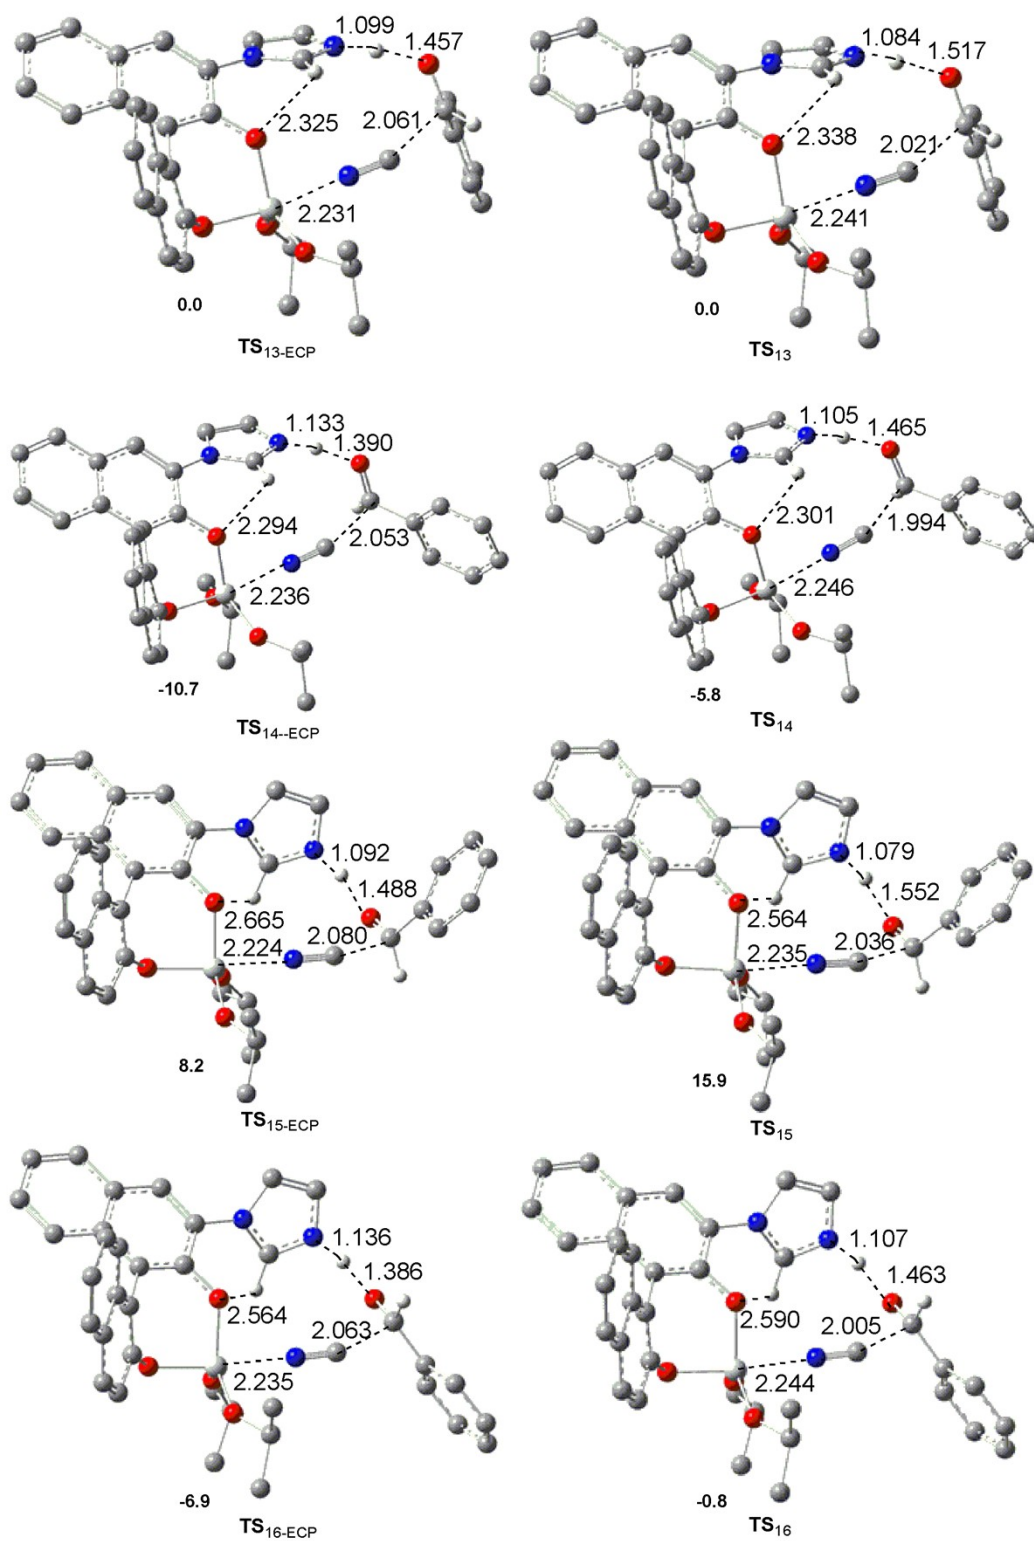

Figure S1. A comparison of TS<sub>13</sub>-TS<sub>16</sub> structures, optimized at B3LYP//LANL2DZ/6-31G\* level and B3LYP//6-31G\* level, respectively. Selected distances are in Å and relative Gibbs free energies are in kJ/mol.

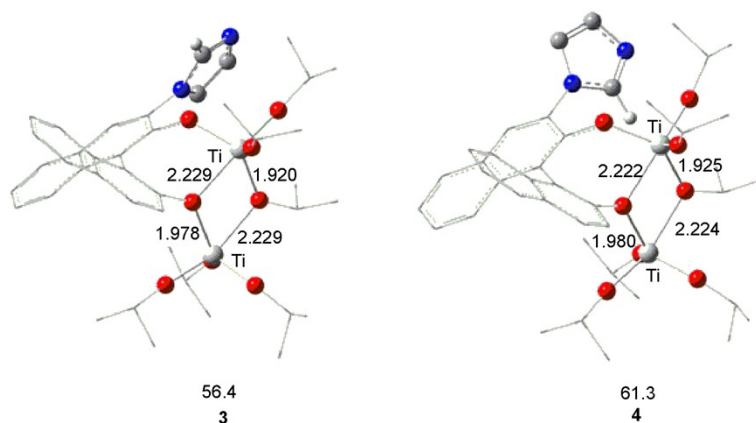

Figure S2. Structures of dinuclear complex **3** and **4**. (Distances are in Å. for clarity, some hydrogen atoms were omitted and bulky groups are displayed with wireframe mode. relative Gibbs free energies are in kJ/mol. The same as follows.)

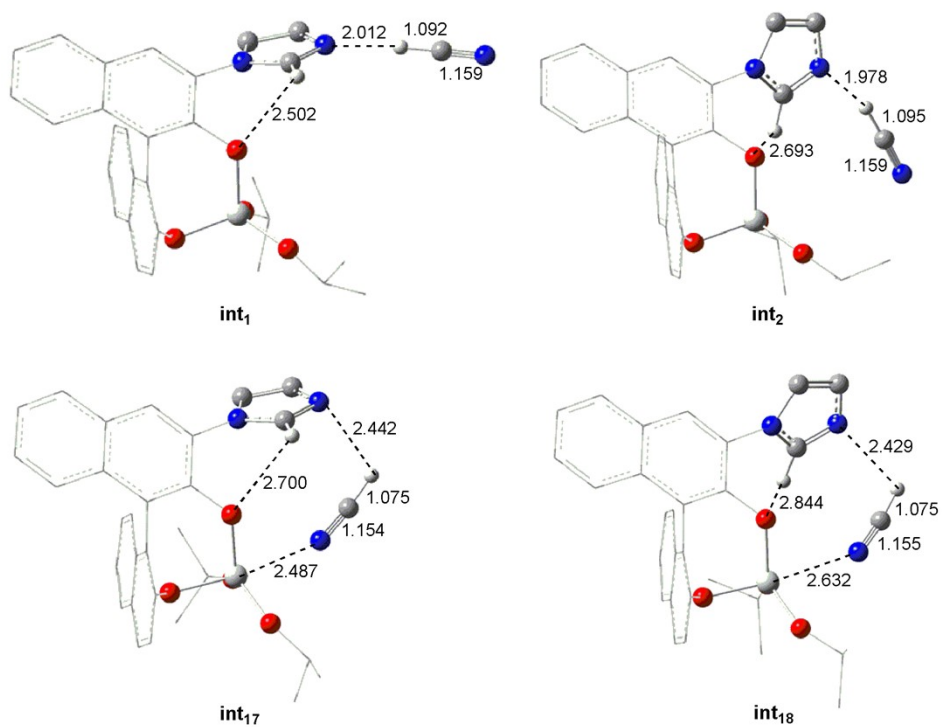

Figure S3. Structures of **int<sub>1</sub>**, **int<sub>2</sub>**, **int<sub>17</sub>** and **int<sub>18</sub>**.

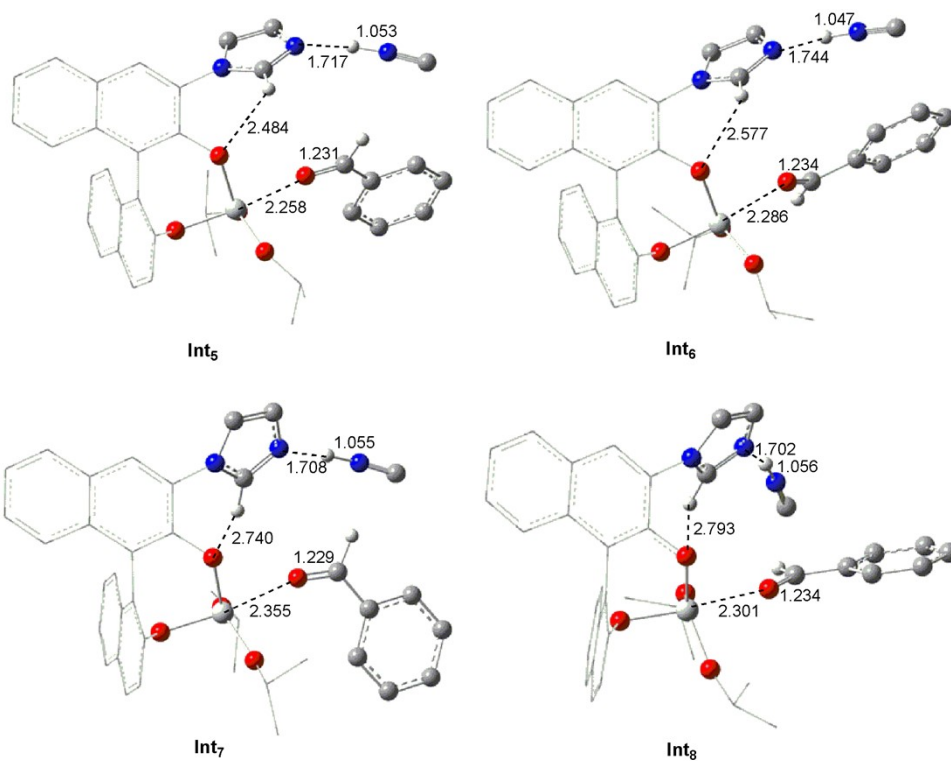

Figure S4. Optimized structure of **int<sub>5</sub>** - **int<sub>8</sub>**.

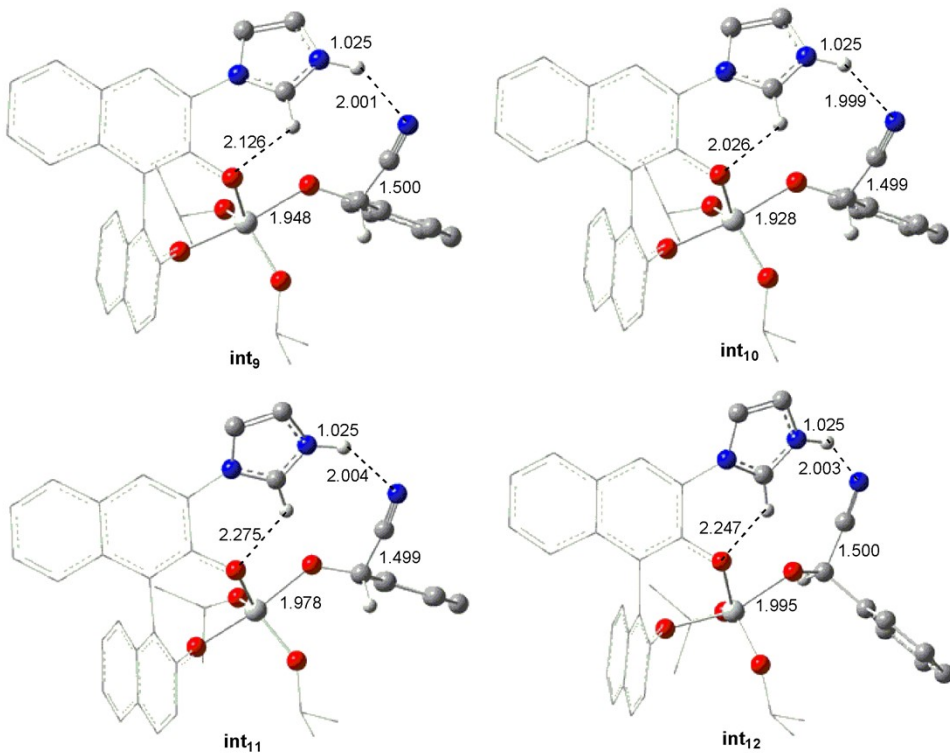

Figure S5. Optimized structure of **int<sub>9</sub>** - **int<sub>12</sub>**.

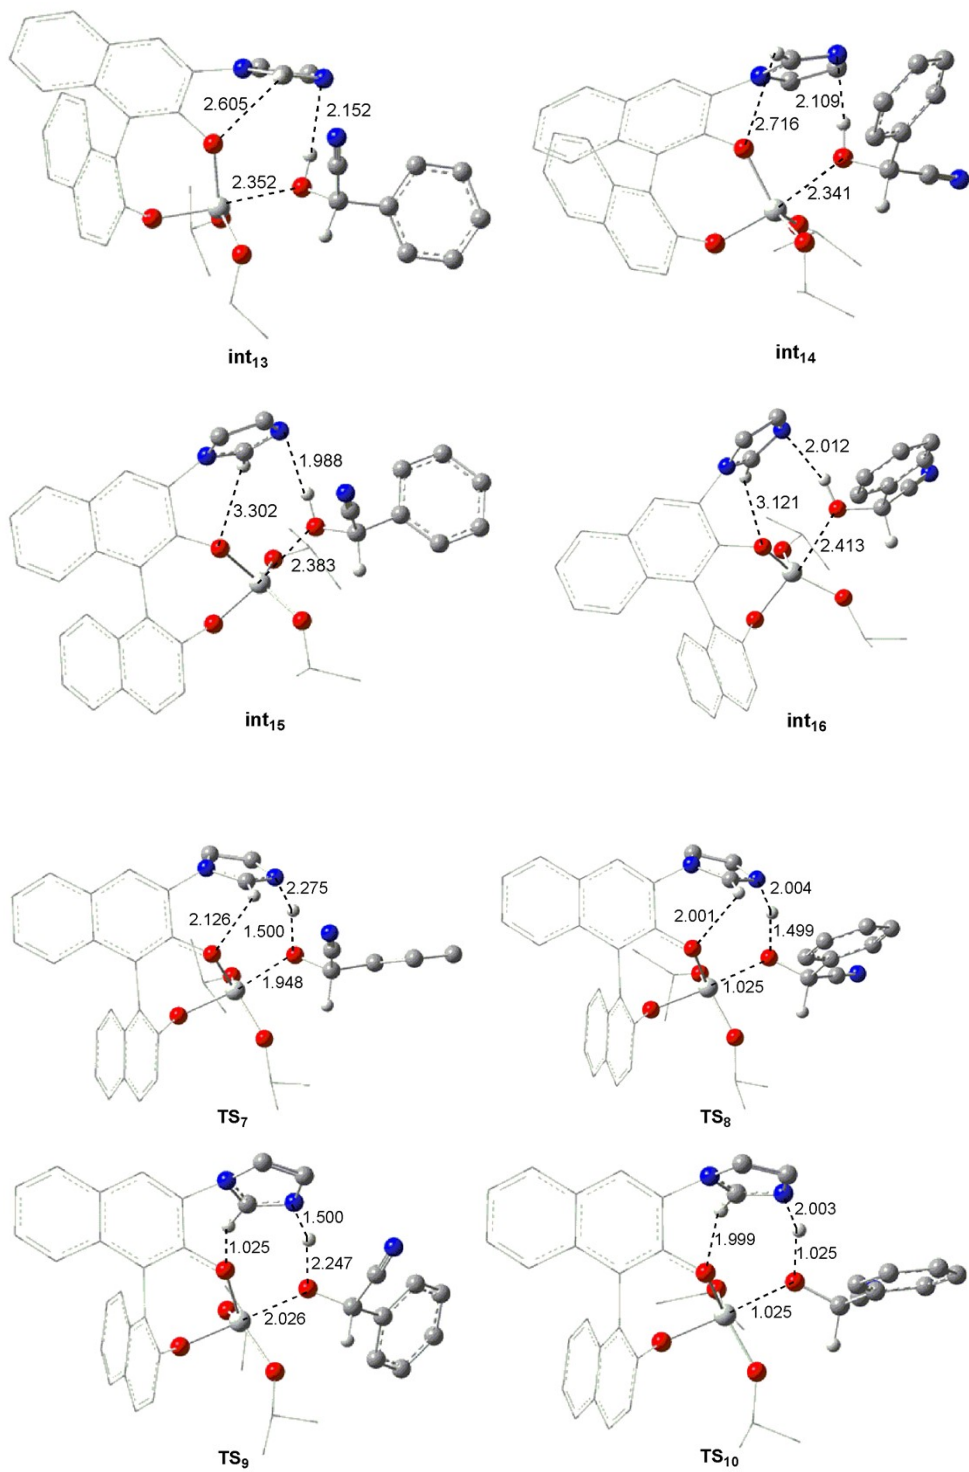

Figure S6. Optimized structure of **int**<sub>13</sub> - **int**<sub>16</sub>, **TS**<sub>7</sub> - **TS**<sub>10</sub>/.

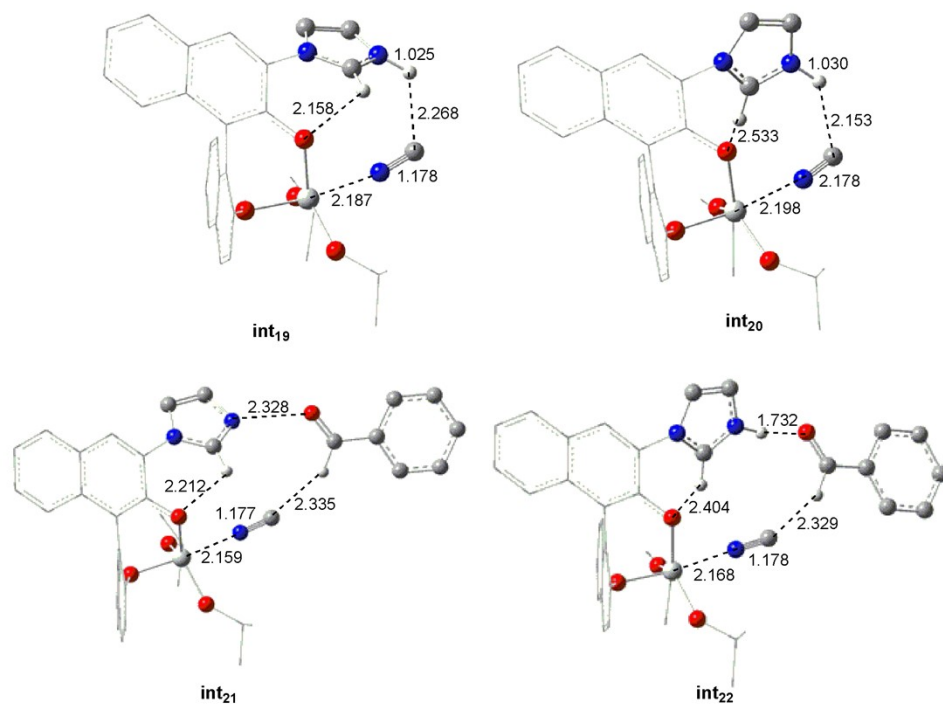

Figure S7. Optimized structure of **int<sub>19</sub>** - **int<sub>20</sub>**.

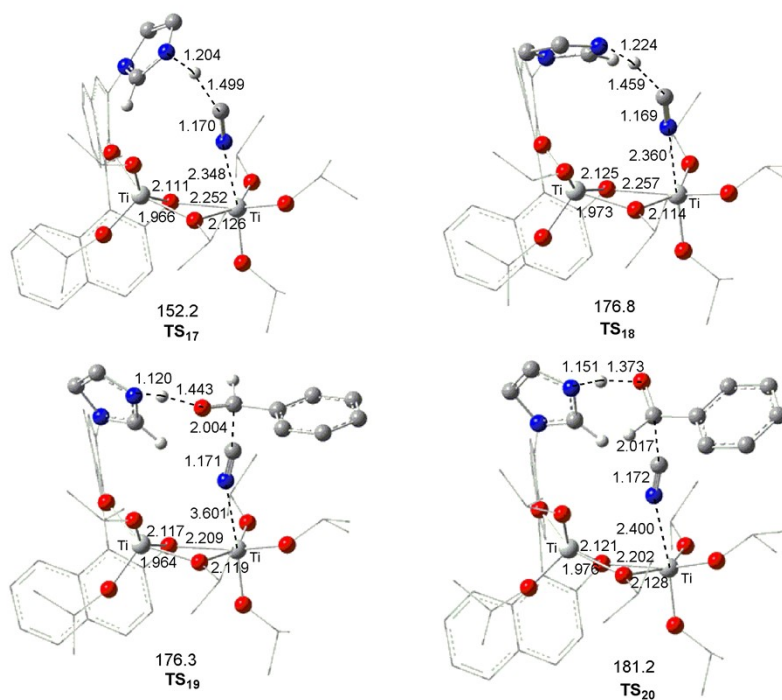

Figure S8. Optimized structure of **TS<sub>17</sub>** - **TS<sub>20</sub>**.

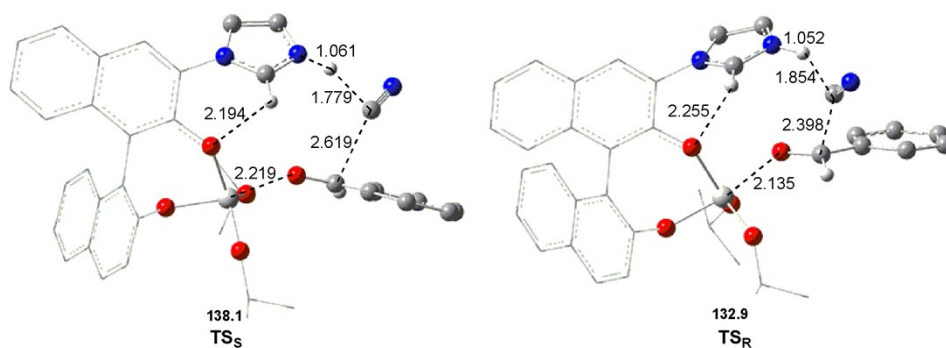

Figure S9. Optimized structure of  $TS_S$  -  $TS_R$ .

## XYZ coordinates, $E_{ZPE}$ (in gas phase) and Gibbs free energies (in $CH_2Cl_2$ )

### Reactants, products, and Catalyst

#### PhCHO

$E_{ZPE}$ : B3LYP/6-31G\* = -345.59606 (a.u.)  
 $G_{sol}$ : B3LYP/6-311++G\*\*/(SMD,M06-2X/6-31G\*, $CH_2Cl_2$ ) = -345.44952 (a.u.)

#### HCN

$E_{ZPE}$ : B3LYP/6-31G\* = -93.40615 (a.u.)  
 $G_{sol}$ : B3LYP/6-311++G\*\*/(SMD,M06-2X/6-31G\*, $CH_2Cl_2$ ) = -93.45831 (a.u.)

#### S-Product

$E_{ZPE}$ : B3LYP/6-31G\* = -438.87101 (a.u.)  
 $G_{sol}$ : B3LYP/6-311++G\*\*/(SMD,M06-2X/6-31G\*, $CH_2Cl_2$ ) = -439.04553 (a.u.)

#### R-Product

$E_{ZPE}$ : B3LYP/6-31G\* = -438.87280 (a.u.)  
 $G_{sol}$ : B3LYP/6-311++G\*\*/(SMD,M06-2X/6-31G\*, $CH_2Cl_2$ ) = -439.04454 (a.u.)

#### Ti(O<sup>i</sup>Pr)<sub>4</sub>

Standard orientation:

| Center Number | Atomic Number | Atomic Type | Coordinates (Angstroms) |           |           |
|---------------|---------------|-------------|-------------------------|-----------|-----------|
|               |               |             | X                       | Y         | Z         |
| 1             | 8             | 0           | -0.326995               | -0.543639 | 1.558466  |
| 2             | 6             | 0           | -0.050576               | -1.646631 | 2.412912  |
| 3             | 6             | 0           | 0.791117                | -1.166797 | 3.595428  |
| 4             | 6             | 0           | -1.369202               | -2.285000 | 2.850012  |
| 5             | 1             | 0           | 0.529197                | -2.384409 | 1.837157  |
| 6             | 1             | 0           | 1.050175                | -2.004945 | 4.253025  |
| 7             | 1             | 0           | 1.719223                | -0.704641 | 3.242816  |
| 8             | 1             | 0           | 0.237406                | -0.424246 | 4.181300  |
| 9             | 1             | 0           | -1.970430               | -1.567030 | 3.419546  |
| 10            | 1             | 0           | -1.947786               | -2.603548 | 1.976657  |
| 11            | 1             | 0           | -1.185067               | -3.162122 | 3.481517  |
| 12            | 8             | 0           | -1.635561               | 0.300769  | -0.906242 |
| 13            | 6             | 0           | -3.031268               | 0.140226  | -0.721649 |
| 14            | 6             | 0           | -3.544725               | -0.952923 | -1.660659 |
| 15            | 6             | 0           | -3.725654               | 1.483202  | -0.953160 |
| 16            | 1             | 0           | -3.208300               | -0.174531 | 0.319542  |
| 17            | 1             | 0           | -4.619139               | -1.118538 | -1.516807 |
| 18            | 1             | 0           | -3.373522               | -0.667593 | -2.704910 |
| 19            | 1             | 0           | -3.020570               | -1.896239 | -1.473642 |
| 20            | 1             | 0           | -3.326876               | 2.241647  | -0.271221 |
| 21            | 1             | 0           | -3.559251               | 1.824558  | -1.981238 |
| 22            | 1             | 0           | -4.805830               | 1.398562  | -0.784490 |
| 23            | 22            | 0           | -0.035331               | 0.041037  | -0.112288 |
| 24            | 8             | 0           | 0.926828                | -1.200276 | -0.990686 |
| 25            | 8             | 0           | 0.901312                | 1.572727  | -0.068823 |
| 26            | 6             | 0           | 1.274675                | 2.723737  | 0.668934  |

|    |   |   |           |           |           |
|----|---|---|-----------|-----------|-----------|
| 27 | 6 | 0 | 2.757799  | 3.009829  | 0.429619  |
| 28 | 6 | 0 | 0.379465  | 3.898238  | 0.271275  |
| 29 | 1 | 0 | 1.124240  | 2.507028  | 1.738507  |
| 30 | 6 | 0 | 2.103904  | -1.351633 | -1.771622 |
| 31 | 6 | 0 | 2.932625  | -2.505451 | -1.205691 |
| 32 | 6 | 0 | 1.715727  | -1.569546 | -3.234470 |
| 33 | 1 | 0 | 2.689198  | -0.422077 | -1.692845 |
| 34 | 1 | 0 | 2.937508  | 3.223183  | -0.630290 |
| 35 | 1 | 0 | 3.086702  | 3.874052  | 1.018599  |
| 36 | 1 | 0 | 3.365641  | 2.144757  | 0.714776  |
| 37 | 1 | 0 | 0.626250  | 4.791870  | 0.856687  |
| 38 | 1 | 0 | 0.508211  | 4.131451  | -0.791768 |
| 39 | 1 | 0 | -0.673760 | 3.651863  | 0.441997  |
| 40 | 1 | 0 | 3.865645  | -2.626185 | -1.768651 |
| 41 | 1 | 0 | 3.184055  | -2.317998 | -0.156403 |
| 42 | 1 | 0 | 2.368701  | -3.443527 | -1.263258 |
| 43 | 1 | 0 | 1.126054  | -2.487455 | -3.338968 |
| 44 | 1 | 0 | 1.113079  | -0.731278 | -3.599368 |
| 45 | 1 | 0 | 2.608534  | -1.655585 | -3.865220 |

-----  
E<sub>ZPE</sub>: B3LYP/6-31G\* = -1624.31472 (a.u.)  
Gsol: B3LYP/6-311++G\*\*/(SMD,M06-2X/6-31G\*,CH2Cl2) = -1624.65425 (a.u.)

1

Standard orientation:

| Center<br>Number | Atomic<br>Number | Atomic<br>Type | Coordinates (Angstroms) |           |           |
|------------------|------------------|----------------|-------------------------|-----------|-----------|
|                  |                  |                | X                       | Y         | Z         |
| 1                | 6                | 0              | -0.678326               | 3.351985  | 0.421452  |
| 2                | 6                | 0              | -1.857925               | 3.083684  | -0.314742 |
| 3                | 6                | 0              | -2.208743               | 1.725241  | -0.607712 |
| 4                | 6                | 0              | -1.372661               | 0.657552  | -0.128158 |
| 5                | 6                | 0              | -0.176193               | 0.974432  | 0.518303  |
| 6                | 6                | 0              | 0.161577                | 2.336078  | 0.810858  |
| 7                | 6                | 0              | -1.775236               | -0.768509 | -0.331265 |
| 8                | 6                | 0              | -1.010476               | -1.637089 | -1.112584 |
| 9                | 6                | 0              | -1.451071               | -2.955646 | -1.403598 |
| 10               | 6                | 0              | -2.624048               | -3.428287 | -0.876532 |
| 11               | 6                | 0              | -2.973209               | -1.283313 | 0.280556  |
| 12               | 6                | 0              | -3.405175               | -2.621264 | -0.007169 |
| 13               | 1                | 0              | -0.430791               | 4.379101  | 0.673641  |
| 14               | 6                | 0              | -2.692426               | 4.139106  | -0.770005 |
| 15               | 6                | 0              | -3.373474               | 1.496035  | -1.392556 |
| 16               | 8                | 0              | 0.189449                | -1.249660 | -1.636479 |
| 17               | 1                | 0              | -0.830417               | -3.565004 | -2.053468 |
| 18               | 1                | 0              | -2.961690               | -4.436560 | -1.104270 |
| 19               | 6                | 0              | -4.591357               | -3.120304 | 0.592532  |
| 20               | 7                | 0              | 1.382368                | 2.636195  | 1.471968  |
| 21               | 7                | 0              | 3.058012                | 2.569444  | 2.950153  |
| 22               | 6                | 0              | 3.246115                | 3.629296  | 2.086982  |
| 23               | 6                | 0              | 2.228790                | 3.697352  | 1.172684  |
| 24               | 6                | 0              | 1.941810                | 1.999591  | 2.557520  |
| 25               | 1                | 0              | 4.106258                | 4.279859  | 2.173899  |
| 26               | 1                | 0              | 2.031899                | 4.355464  | 0.340564  |
| 27               | 1                | 0              | 1.479221                | 1.132993  | 3.004463  |
| 28               | 6                | 0              | -3.749625               | -0.522655 | 1.200012  |
| 29               | 8                | 0              | 0.694594                | 0.004145  | 0.895993  |
| 30               | 22               | 0              | 1.561555                | -0.946261 | -0.445222 |
| 31               | 8                | 0              | 2.807647                | -0.001212 | -1.273339 |
| 32               | 8                | 0              | 2.194683                | -2.427313 | 0.269867  |
| 33               | 6                | 0              | 4.150783                | 0.347023  | -1.597178 |
| 34               | 6                | 0              | 2.663131                | -3.706853 | 0.667297  |
| 35               | 6                | 0              | 4.238942                | 1.861365  | -1.773223 |
| 36               | 6                | 0              | 4.579113                | -0.423755 | -2.845478 |
| 37               | 1                | 0              | 4.783392                | 0.045255  | -0.749916 |
| 38               | 6                | 0              | 2.348681                | -3.910098 | 2.148766  |
| 39               | 6                | 0              | 4.153708                | -3.823092 | 0.351291  |
| 40               | 1                | 0              | 2.109313                | -4.450228 | 0.075684  |
| 41               | 6                | 0              | -3.820975               | 3.878243  | -1.512024 |



|    |   |   |           |           |           |
|----|---|---|-----------|-----------|-----------|
| 42 | 6 | 0 | -4.154499 | 2.541812  | -1.833175 |
| 43 | 6 | 0 | -4.889157 | -1.040823 | 1.775371  |
| 44 | 6 | 0 | -5.325258 | -2.349403 | 1.464507  |
| 45 | 1 | 0 | -2.413999 | 5.162012  | -0.527418 |
| 46 | 1 | 0 | -4.449196 | 4.693424  | -1.860180 |
| 47 | 1 | 0 | -5.034511 | 2.337193  | -2.436939 |
| 48 | 1 | 0 | -3.639723 | 0.478666  | -1.654201 |
| 49 | 1 | 0 | -3.427983 | 0.479802  | 1.457743  |
| 50 | 1 | 0 | -5.456625 | -0.437257 | 2.478762  |
| 51 | 1 | 0 | -6.228766 | -2.744142 | 1.920923  |
| 52 | 1 | 0 | -4.904076 | -4.134461 | 0.354143  |
| 53 | 1 | 0 | 5.272845  | 2.160401  | -1.980903 |
| 54 | 1 | 0 | 3.609215  | 2.183760  | -2.610290 |
| 55 | 1 | 0 | 3.904618  | 2.373449  | -0.865886 |
| 56 | 1 | 0 | 5.617921  | -0.188536 | -3.103654 |
| 57 | 1 | 0 | 4.501594  | -1.503836 | -2.680935 |
| 58 | 1 | 0 | 3.940691  | -0.156714 | -3.694936 |
| 59 | 1 | 0 | 2.653288  | -4.912526 | 2.470526  |
| 60 | 1 | 0 | 2.883284  | -3.171886 | 2.756719  |
| 61 | 1 | 0 | 1.275654  | -3.797337 | 2.332009  |
| 62 | 1 | 0 | 4.522577  | -4.823076 | 0.606126  |
| 63 | 1 | 0 | 4.336636  | -3.649243 | -0.714300 |
| 64 | 1 | 0 | 4.724619  | -3.086212 | 0.927406  |

-----  
E<sub>ZPE</sub>: B3LYP/6-31G\* = -2381.51669 (a.u.)  
Gsol: B3LYP/6-311++G\*\*/(SMD,M06-2X/6-31G\*,CH2Cl2) = -2382.05335 (a.u.)

2

Standard orientation:

| Center<br>Number | Atomic<br>Number | Atomic<br>Type | Coordinates (Angstroms) |           |           |
|------------------|------------------|----------------|-------------------------|-----------|-----------|
|                  |                  |                | X                       | Y         | Z         |
| 1                | 6                | 0              | -0.833723               | 3.479472  | 0.221721  |
| 2                | 6                | 0              | -2.021909               | 3.099104  | -0.450922 |
| 3                | 6                | 0              | -2.257734               | 1.710249  | -0.722557 |
| 4                | 6                | 0              | -1.304369               | 0.732023  | -0.276410 |
| 5                | 6                | 0              | -0.124253               | 1.150297  | 0.338865  |
| 6                | 6                | 0              | 0.099959                | 2.544193  | 0.598164  |
| 7                | 6                | 0              | -1.588870               | -0.725249 | -0.451386 |
| 8                | 6                | 0              | -0.777080               | -1.527818 | -1.253603 |
| 9                | 6                | 0              | -1.109782               | -2.889050 | -1.504498 |
| 10               | 6                | 0              | -2.217282               | -3.455150 | -0.929210 |
| 11               | 6                | 0              | -2.719035               | -1.326943 | 0.207286  |
| 12               | 6                | 0              | -3.038703               | -2.704175 | -0.043142 |
| 13               | 1                | 0              | -0.641855               | 4.529016  | 0.413259  |
| 14               | 6                | 0              | -2.966431               | 4.068304  | -0.888243 |
| 15               | 6                | 0              | -3.427655               | 1.359333  | -1.455412 |
| 16               | 8                | 0              | 0.384085                | -1.044515 | -1.801311 |
| 17               | 1                | 0              | -0.465308               | -3.449628 | -2.170931 |
| 18               | 1                | 0              | -2.473726               | -4.489897 | -1.130062 |
| 19               | 6                | 0              | -4.155802               | -3.291826 | 0.610330  |
| 20               | 7                | 0              | 1.281077                | 2.947827  | 1.276582  |
| 21               | 7                | 0              | 3.444466                | 3.251837  | 1.730483  |
| 22               | 6                | 0              | 2.678292                | 3.893418  | 2.681797  |
| 23               | 6                | 0              | 1.342823                | 3.727076  | 2.423203  |
| 24               | 6                | 0              | 2.581355                | 2.697700  | 0.909615  |
| 25               | 1                | 0              | 3.134465                | 4.434583  | 3.500078  |
| 26               | 1                | 0              | 0.446171                | 4.045479  | 2.932667  |
| 27               | 1                | 0              | 2.817154                | 2.113729  | 0.031943  |
| 28               | 6                | 0              | -3.525328               | -0.610211 | 1.137557  |
| 29               | 8                | 0              | 0.834149                | 0.268092  | 0.710472  |
| 30               | 22               | 0              | 1.685277                | -0.835547 | -0.512166 |
| 31               | 8                | 0              | 3.104377                | -0.047459 | -1.231822 |
| 32               | 8                | 0              | 2.091802                | -2.344043 | 0.314423  |
| 33               | 6                | 0              | 4.548029                | -0.014103 | -1.279268 |
| 34               | 6                | 0              | 1.629173                | -3.445405 | 1.125233  |
| 35               | 6                | 0              | 4.955703                | 0.944252  | -2.407676 |
| 36               | 6                | 0              | 5.087371                | -1.435412 | -1.498205 |
| 37               | 1                | 0              | 4.897393                | 0.377431  | -0.314908 |

|    |   |   |           |           |           |
|----|---|---|-----------|-----------|-----------|
| 38 | 1 | 0 | 0.731514  | -3.851730 | 0.642563  |
| 39 | 6 | 0 | 1.278416  | -2.914211 | 2.522575  |
| 40 | 6 | 0 | 2.736717  | -4.507753 | 1.160609  |
| 41 | 6 | 0 | -4.318273 | 2.323207  | -1.871699 |
| 42 | 6 | 0 | -4.093298 | 3.691263  | -1.580834 |
| 43 | 6 | 0 | -4.920485 | -2.565008 | 1.493677  |
| 44 | 6 | 0 | -4.593302 | -1.213839 | 1.763183  |
| 45 | 1 | 0 | -5.199241 | 2.035057  | -2.433332 |
| 46 | 1 | 0 | -4.805964 | 4.436145  | -1.914385 |
| 47 | 1 | 0 | -2.773679 | 5.113650  | -0.671519 |
| 48 | 1 | 0 | -3.602352 | 0.317154  | -1.684171 |
| 49 | 1 | 0 | -3.280051 | 0.421787  | 1.346843  |
| 50 | 1 | 0 | -5.189892 | -0.651178 | 2.471782  |
| 51 | 1 | 0 | -5.767758 | -3.022686 | 1.990449  |
| 52 | 1 | 0 | -4.388110 | -4.331277 | 0.403341  |
| 53 | 1 | 0 | 4.538808  | 1.939657  | -2.228730 |
| 54 | 1 | 0 | 4.575859  | 0.566504  | -3.362396 |
| 55 | 1 | 0 | 6.046972  | 1.021454  | -2.459664 |
| 56 | 1 | 0 | 4.733877  | -1.815874 | -2.462719 |
| 57 | 1 | 0 | 4.736539  | -2.100463 | -0.703206 |
| 58 | 1 | 0 | 6.182458  | -1.427546 | -1.498764 |
| 59 | 1 | 0 | 0.520681  | -2.128680 | 2.446931  |
| 60 | 1 | 0 | 2.174960  | -2.496439 | 2.991975  |
| 61 | 1 | 0 | 0.890759  | -3.725193 | 3.148234  |
| 62 | 1 | 0 | 3.632034  | -4.087738 | 1.630272  |
| 63 | 1 | 0 | 2.984999  | -4.830806 | 0.144990  |
| 64 | 1 | 0 | 2.405940  | -5.377127 | 1.739077  |

E<sub>ZPE</sub>: B3LYP/6-31G\* = -2381.51513 (a.u.)

Gsol: B3LYP/6-311++G\*\*/(SMD,M06-2X/6-31G\*,CH2Cl2) = -2382.05041 (a.u.)

### 3

Standard orientation:

| Center Number | Atomic Number | Atomic Type | Coordinates (Angstroms) |           |           |
|---------------|---------------|-------------|-------------------------|-----------|-----------|
|               |               |             | X                       | Y         | Z         |
| 1             | 6             | 0           | 1.393045                | -2.562892 | -2.933325 |
| 2             | 6             | 0           | 2.639995                | -1.949332 | -2.662172 |
| 3             | 6             | 0           | 2.860505                | -1.357559 | -1.375070 |
| 4             | 6             | 0           | 1.825459                | -1.417096 | -0.379816 |
| 5             | 6             | 0           | 0.583217                | -1.961155 | -0.710202 |
| 6             | 6             | 0           | 0.382556                | -2.557045 | -2.001607 |
| 7             | 6             | 0           | 4.108085                | -0.706147 | -1.154935 |
| 8             | 6             | 0           | 5.079951                | -0.670219 | -2.131645 |
| 9             | 6             | 0           | 4.866882                | -1.286273 | -3.387043 |
| 10            | 6             | 0           | 3.667240                | -1.909073 | -3.642619 |
| 11            | 1             | 0           | 1.233034                | -3.044769 | -3.893729 |
| 12            | 1             | 0           | 3.481133                | -2.376166 | -4.607100 |
| 13            | 1             | 0           | 5.644221                | -1.258377 | -4.145591 |
| 14            | 1             | 0           | 6.021002                | -0.163900 | -1.933464 |
| 15            | 1             | 0           | 4.290880                | -0.229239 | -0.199256 |
| 16            | 7             | 0           | -0.878486               | -3.125572 | -2.327078 |
| 17            | 8             | 0           | -0.441986               | -1.973633 | 0.154634  |
| 18            | 22            | 0           | -1.672336               | -0.684704 | 0.759985  |
| 19            | 8             | 0           | -3.171436               | -1.612812 | 0.468229  |
| 20            | 8             | 0           | -1.716508               | -0.511323 | 2.522917  |
| 21            | 6             | 0           | -1.553464               | -2.987573 | -3.533985 |
| 22            | 6             | 0           | -2.681263               | -3.755150 | -3.416926 |
| 23            | 7             | 0           | -2.725340               | -4.373585 | -2.183356 |
| 24            | 6             | 0           | -1.638534               | -3.975420 | -1.561096 |
| 25            | 1             | 0           | -1.177747               | -2.347749 | -4.317488 |
| 26            | 1             | 0           | -3.467674               | -3.897270 | -4.146140 |
| 27            | 1             | 0           | -1.337440               | -4.253319 | -0.563214 |
| 28            | 6             | 0           | -1.623468               | -0.610243 | 3.932078  |
| 29            | 6             | 0           | -3.023772               | -0.536145 | 4.543563  |
| 30            | 6             | 0           | -0.870413               | -1.881963 | 4.322351  |
| 31            | 1             | 0           | -1.042638               | 0.259324  | 4.271808  |
| 32            | 6             | 0           | -4.272864               | -2.327538 | 1.016722  |
| 33            | 6             | 0           | -5.340585               | -2.524927 | -0.060041 |

|     |    |   |           |           |           |
|-----|----|---|-----------|-----------|-----------|
| 34  | 6  | 0 | -3.796742 | -3.664322 | 1.588727  |
| 35  | 1  | 0 | -4.684084 | -1.715902 | 1.835231  |
| 36  | 1  | 0 | -3.626568 | -1.395725 | 4.229480  |
| 37  | 1  | 0 | -2.963359 | -0.538021 | 5.638166  |
| 38  | 1  | 0 | -3.534272 | 0.379091  | 4.226681  |
| 39  | 1  | 0 | -0.743671 | -1.930623 | 5.410207  |
| 40  | 1  | 0 | -1.422528 | -2.772420 | 4.000758  |
| 41  | 1  | 0 | 0.119294  | -1.899395 | 3.857361  |
| 42  | 1  | 0 | -6.205434 | -3.052554 | 0.359270  |
| 43  | 1  | 0 | -5.685338 | -1.563980 | -0.454950 |
| 44  | 1  | 0 | -4.931734 | -3.120143 | -0.883001 |
| 45  | 1  | 0 | -3.435646 | -4.313266 | 0.785093  |
| 46  | 1  | 0 | -2.988837 | -3.511867 | 2.311475  |
| 47  | 1  | 0 | -4.624179 | -4.173623 | 2.097019  |
| 48  | 22 | 0 | -0.270614 | 2.233299  | -0.323311 |
| 49  | 8  | 0 | 1.414430  | 2.815185  | -0.274747 |
| 50  | 8  | 0 | -2.061061 | 0.906487  | -0.241647 |
| 51  | 8  | 0 | -1.171321 | 3.515653  | 0.548753  |
| 52  | 8  | 0 | -0.516859 | 2.247086  | -2.110739 |
| 53  | 6  | 0 | 2.630233  | 3.334903  | 0.230739  |
| 54  | 6  | 0 | 3.673533  | 3.366171  | -0.887268 |
| 55  | 6  | 0 | 2.394239  | 4.712685  | 0.851678  |
| 56  | 6  | 0 | 0.246908  | 2.588802  | -3.262750 |
| 57  | 6  | 0 | 0.322590  | 1.376864  | -4.191766 |
| 58  | 6  | 0 | -0.381710 | 3.805320  | -3.943632 |
| 59  | 6  | 0 | -3.266769 | 1.389595  | -0.874240 |
| 60  | 6  | 0 | -4.394385 | 1.509104  | 0.149923  |
| 61  | 6  | 0 | -3.617069 | 0.526796  | -2.083426 |
| 62  | 6  | 0 | -2.026261 | 4.633900  | 0.682620  |
| 63  | 6  | 0 | -2.229002 | 4.927304  | 2.170182  |
| 64  | 6  | 0 | -1.459778 | 5.833770  | -0.078791 |
| 65  | 1  | 0 | 2.974653  | 2.647546  | 1.016233  |
| 66  | 1  | 0 | 3.809312  | 2.367835  | -1.314552 |
| 67  | 1  | 0 | 3.358337  | 4.047623  | -1.686313 |
| 68  | 1  | 0 | 4.638979  | 3.712935  | -0.499994 |
| 69  | 1  | 0 | 3.317314  | 5.090989  | 1.306268  |
| 70  | 1  | 0 | 2.067575  | 5.427783  | 0.087674  |
| 71  | 1  | 0 | 1.622253  | 4.659884  | 1.625808  |
| 72  | 1  | 0 | 1.261612  | 2.849120  | -2.929105 |
| 73  | 1  | 0 | 0.939888  | 1.603193  | -5.069365 |
| 74  | 1  | 0 | 0.762777  | 0.519885  | -3.672688 |
| 75  | 1  | 0 | -0.679556 | 1.096929  | -4.537666 |
| 76  | 1  | 0 | -0.420096 | 4.656477  | -3.255362 |
| 77  | 1  | 0 | -1.403570 | 3.578259  | -4.269002 |
| 78  | 1  | 0 | 0.202748  | 4.100844  | -4.823035 |
| 79  | 1  | 0 | -3.022741 | 2.395840  | -1.234839 |
| 80  | 1  | 0 | -5.280191 | 1.962412  | -0.310741 |
| 81  | 1  | 0 | -4.673416 | 0.526457  | 0.540105  |
| 82  | 1  | 0 | -4.080880 | 2.139478  | 0.988904  |
| 83  | 1  | 0 | -4.502961 | 0.928082  | -2.590858 |
| 84  | 1  | 0 | -2.783167 | 0.527832  | -2.791188 |
| 85  | 1  | 0 | -3.821769 | -0.504094 | -1.784004 |
| 86  | 1  | 0 | -3.000262 | 4.367779  | 0.242838  |
| 87  | 1  | 0 | -2.934840 | 5.754431  | 2.309676  |
| 88  | 1  | 0 | -2.622494 | 4.044203  | 2.683962  |
| 89  | 1  | 0 | -1.276408 | 5.201484  | 2.638036  |
| 90  | 1  | 0 | -0.485481 | 6.121549  | 0.330912  |
| 91  | 1  | 0 | -1.330186 | 5.588978  | -1.138089 |
| 92  | 1  | 0 | -2.136551 | 6.693017  | -0.003797 |
| 93  | 6  | 0 | 2.037181  | -0.849448 | 0.983630  |
| 94  | 6  | 0 | 3.048629  | -1.358061 | 1.870087  |
| 95  | 6  | 0 | 3.281017  | -0.712199 | 3.131070  |
| 96  | 6  | 0 | 2.479545  | 0.403130  | 3.492317  |
| 97  | 6  | 0 | 1.467382  | 0.832919  | 2.671007  |
| 98  | 6  | 0 | 1.229752  | 0.194118  | 1.424856  |
| 99  | 6  | 0 | 3.826900  | -2.510576 | 1.563925  |
| 100 | 6  | 0 | 4.787801  | -2.976694 | 2.433951  |
| 101 | 6  | 0 | 5.033182  | -2.317277 | 3.661145  |
| 102 | 6  | 0 | 4.289127  | -1.210249 | 3.998622  |
| 103 | 1  | 0 | 3.647350  | -3.033313 | 0.631194  |

|     |   |   |          |           |          |
|-----|---|---|----------|-----------|----------|
| 104 | 1 | 0 | 5.360780 | -3.863465 | 2.175975 |
| 105 | 1 | 0 | 5.798068 | -2.692080 | 4.335753 |
| 106 | 1 | 0 | 4.454488 | -0.701403 | 4.945791 |
| 107 | 1 | 0 | 2.664014 | 0.898749  | 4.442703 |
| 108 | 1 | 0 | 0.822584 | 1.660437  | 2.952453 |
| 109 | 8 | 0 | 0.156223 | 0.588902  | 0.690455 |

E<sub>ZPE</sub>: B3LYP/6-31G\* = -4005.84865 (a.u.)  
Gsol: B3LYP/6-311++G\*\*/(SMD,M06-2X/6-31G\*,CH2Cl2) = -4006.68610 (a.u.)

4

Standard orientation:

| Center Number | Atomic Number | Atomic Type | Coordinates (Angstroms) |           |           |
|---------------|---------------|-------------|-------------------------|-----------|-----------|
|               |               |             | X                       | Y         | Z         |
| 1             | 6             | 0           | 2.211278                | -2.204216 | -2.830776 |
| 2             | 6             | 0           | 3.199346                | -1.214170 | -2.612770 |
| 3             | 6             | 0           | 3.168205                | -0.459789 | -1.393928 |
| 4             | 6             | 0           | 2.168762                | -0.746146 | -0.399790 |
| 5             | 6             | 0           | 1.165172                | -1.677544 | -0.683098 |
| 6             | 6             | 0           | 1.216644                | -2.423216 | -1.910101 |
| 7             | 6             | 0           | 4.134460                | 0.576447  | -1.240332 |
| 8             | 6             | 0           | 5.078633                | 0.826774  | -2.212485 |
| 9             | 6             | 0           | 5.121007                | 0.055560  | -3.397557 |
| 10            | 6             | 0           | 4.193751                | -0.941994 | -3.589718 |
| 11            | 1             | 0           | 2.220637                | -2.781734 | -3.751196 |
| 12            | 1             | 0           | 4.199433                | -1.534832 | -4.501549 |
| 13            | 1             | 0           | 5.874978                | 0.259213  | -4.152795 |
| 14            | 1             | 0           | 5.798706                | 1.627574  | -2.065966 |
| 15            | 1             | 0           | 4.119633                | 1.180993  | -0.341278 |
| 16            | 7             | 0           | 0.243831                | -3.434347 | -2.164261 |
| 17            | 8             | 0           | 0.169952                | -1.949393 | 0.168165  |
| 18            | 22            | 0           | -1.351823               | -1.100051 | 0.872512  |
| 19            | 8             | 0           | -2.467767               | -2.479307 | 0.718698  |
| 20            | 8             | 0           | -1.276248               | -0.878924 | 2.630894  |
| 21            | 6             | 0           | 0.494001                | -4.788396 | -2.328614 |
| 22            | 6             | 0           | -0.725422               | -5.360816 | -2.583954 |
| 23            | 7             | 0           | -1.719926               | -4.404622 | -2.589683 |
| 24            | 6             | 0           | -1.105222               | -3.269965 | -2.334452 |
| 25            | 1             | 0           | 1.491488                | -5.188864 | -2.230032 |
| 26            | 1             | 0           | -0.946432               | -6.404116 | -2.766218 |
| 27            | 1             | 0           | -1.570775               | -2.297889 | -2.270025 |
| 28            | 6             | 0           | -0.964709               | -1.098716 | 3.996435  |
| 29            | 6             | 0           | -2.229771               | -1.509459 | 4.751049  |
| 30            | 6             | 0           | 0.163888                | -2.121385 | 4.124706  |
| 31            | 1             | 0           | -0.611925               | -0.135936 | 4.392719  |
| 32            | 6             | 0           | -3.018548               | -3.701797 | 1.192569  |
| 33            | 6             | 0           | -4.151211               | -4.147152 | 0.266654  |
| 34            | 6             | 0           | -1.917998               | -4.758657 | 1.300699  |
| 35            | 1             | 0           | -3.426621               | -3.502896 | 2.196281  |
| 36            | 1             | 0           | -2.601254               | -2.472952 | 4.383600  |
| 37            | 1             | 0           | -2.020967               | -1.605812 | 5.823008  |
| 38            | 1             | 0           | -3.018130               | -0.761502 | 4.618138  |
| 39            | 1             | 0           | 0.455504                | -2.237684 | 5.175015  |
| 40            | 1             | 0           | -0.156695               | -3.098868 | 3.746232  |
| 41            | 1             | 0           | 1.040530                | -1.799713 | 3.555180  |
| 42            | 1             | 0           | -4.609068               | -5.066769 | 0.650087  |
| 43            | 1             | 0           | -4.930484               | -3.380341 | 0.204656  |
| 44            | 1             | 0           | -3.762189               | -4.341935 | -0.738429 |
| 45            | 1             | 0           | -1.496259               | -4.972025 | 0.314129  |
| 46            | 1             | 0           | -1.110689               | -4.415650 | 1.955693  |
| 47            | 1             | 0           | -2.328334               | -5.687534 | 1.714538  |
| 48            | 22            | 0           | -1.112157               | 2.057697  | -0.392291 |
| 49            | 8             | 0           | 0.287931                | 3.154333  | -0.532238 |
| 50            | 8             | 0           | -2.358645               | 0.243955  | -0.068663 |
| 51            | 8             | 0           | -2.294693               | 3.030964  | 0.543730  |
| 52            | 8             | 0           | -1.510323               | 1.888243  | -2.142422 |
| 53            | 6             | 0           | 1.307226                | 4.068605  | -0.174412 |

|     |   |   |           |           |           |
|-----|---|---|-----------|-----------|-----------|
| 54  | 6 | 0 | 2.263876  | 4.252826  | -1.353331 |
| 55  | 6 | 0 | 0.684713  | 5.387053  | 0.287872  |
| 56  | 6 | 0 | -0.970351 | 2.324597  | -3.386153 |
| 57  | 6 | 0 | -0.404009 | 1.120709  | -4.139687 |
| 58  | 6 | 0 | -2.059447 | 3.048498  | -4.178339 |
| 59  | 6 | 0 | -3.740965 | 0.314548  | -0.483791 |
| 60  | 6 | 0 | -4.671717 | 0.074466  | 0.703976  |
| 61  | 6 | 0 | -3.995528 | -0.621925 | -1.661266 |
| 62  | 6 | 0 | -3.403857 | 3.892146  | 0.714580  |
| 63  | 6 | 0 | -3.308175 | 4.567903  | 2.083429  |
| 64  | 6 | 0 | -3.482492 | 4.899374  | -0.434146 |
| 65  | 1 | 0 | 1.862461  | 3.625145  | 0.664328  |
| 66  | 1 | 0 | 2.683527  | 3.290734  | -1.662899 |
| 67  | 1 | 0 | 1.738515  | 4.694925  | -2.208133 |
| 68  | 1 | 0 | 3.089757  | 4.918451  | -1.075445 |
| 69  | 1 | 0 | 1.462738  | 6.082946  | 0.622966  |
| 70  | 1 | 0 | 0.131195  | 5.857512  | -0.533343 |
| 71  | 1 | 0 | -0.008461 | 5.215425  | 1.117306  |
| 72  | 1 | 0 | -0.153426 | 3.028541  | -3.170795 |
| 73  | 1 | 0 | 0.050230  | 1.437919  | -5.085918 |
| 74  | 1 | 0 | 0.362489  | 0.616224  | -3.542901 |
| 75  | 1 | 0 | -1.198224 | 0.399109  | -4.364577 |
| 76  | 1 | 0 | -2.437269 | 3.910375  | -3.618225 |
| 77  | 1 | 0 | -2.898319 | 2.372755  | -4.380629 |
| 78  | 1 | 0 | -1.665647 | 3.407010  | -5.136701 |
| 79  | 1 | 0 | -3.887970 | 1.343759  | -0.831642 |
| 80  | 1 | 0 | -5.715558 | 0.226803  | 0.404502  |
| 81  | 1 | 0 | -4.566247 | -0.946867 | 1.081058  |
| 82  | 1 | 0 | -4.440114 | 0.771720  | 1.516226  |
| 83  | 1 | 0 | -5.027377 | -0.513490 | -2.016861 |
| 84  | 1 | 0 | -3.321612 | -0.369926 | -2.485833 |
| 85  | 1 | 0 | -3.837129 | -1.664723 | -1.374612 |
| 86  | 1 | 0 | -4.311439 | 3.268421  | 0.697548  |
| 87  | 1 | 0 | -4.192277 | 5.188649  | 2.270478  |
| 88  | 1 | 0 | -3.238148 | 3.816574  | 2.876624  |
| 89  | 1 | 0 | -2.419625 | 5.207589  | 2.134209  |
| 90  | 1 | 0 | -2.592701 | 5.538959  | -0.442208 |
| 91  | 1 | 0 | -3.541373 | 4.378167  | -1.395187 |
| 92  | 1 | 0 | -4.368310 | 5.536989  | -0.331234 |
| 93  | 6 | 0 | 2.181694  | -0.041257 | 0.914791  |
| 94  | 6 | 0 | 3.303494  | -0.134043 | 1.812848  |
| 95  | 6 | 0 | 3.323165  | 0.654277  | 3.012421  |
| 96  | 6 | 0 | 2.211038  | 1.486340  | 3.309308  |
| 97  | 6 | 0 | 1.111315  | 1.502820  | 2.489288  |
| 98  | 6 | 0 | 1.085129  | 0.721690  | 1.302849  |
| 99  | 6 | 0 | 4.402066  | -1.009720 | 1.580611  |
| 100 | 6 | 0 | 5.460939  | -1.079229 | 2.459286  |
| 101 | 6 | 0 | 5.490135  | -0.273728 | 3.621394  |
| 102 | 6 | 0 | 4.437441  | 0.570917  | 3.888868  |
| 103 | 1 | 0 | 4.393594  | -1.640898 | 0.699374  |
| 104 | 1 | 0 | 6.280877  | -1.763777 | 2.258521  |
| 105 | 1 | 0 | 6.334526  | -0.332784 | 4.302679  |
| 106 | 1 | 0 | 4.435932  | 1.183917  | 4.787580  |
| 107 | 1 | 0 | 2.232257  | 2.091774  | 4.212572  |
| 108 | 1 | 0 | 0.236008  | 2.099610  | 2.728820  |
| 109 | 8 | 0 | -0.064141 | 0.686743  | 0.578550  |

E<sub>ZPE</sub>: B3LYP/6-31G\* = -4005.84736 (a.u.)  
 Gsol: B3LYP/6-311++G\*\*/(SMD,M06-2X/6-31G\*,CH2Cl2) = -4006.68424 (a.u.)

### Species involved in the bifunctional LALB mechanism

#### Int<sub>1</sub>

Standard orientation:

| Center Number | Atomic Number | Atomic Type | Coordinates (Angstroms) |          |          |
|---------------|---------------|-------------|-------------------------|----------|----------|
|               |               |             | X                       | Y        | Z        |
| 1             | 6             | 0           | -0.615469               | 3.384160 | 0.103246 |

|    |    |   |           |           |           |
|----|----|---|-----------|-----------|-----------|
| 2  | 6  | 0 | -1.935169 | 3.187994  | -0.371215 |
| 3  | 6  | 0 | -2.443889 | 1.853656  | -0.496006 |
| 4  | 6  | 0 | -1.618434 | 0.738772  | -0.115198 |
| 5  | 6  | 0 | -0.295396 | 0.975595  | 0.263807  |
| 6  | 6  | 0 | 0.197065  | 2.314599  | 0.391481  |
| 7  | 6  | 0 | -2.167701 | -0.651877 | -0.138755 |
| 8  | 6  | 0 | -1.645435 | -1.624943 | -0.992898 |
| 9  | 6  | 0 | -2.239724 | -2.909905 | -1.105564 |
| 10 | 6  | 0 | -3.319900 | -3.244695 | -0.332221 |
| 11 | 6  | 0 | -3.259239 | -1.021679 | 0.725030  |
| 12 | 6  | 0 | -3.846162 | -2.326570 | 0.615191  |
| 13 | 1  | 0 | -0.241295 | 4.395679  | 0.233001  |
| 14 | 6  | 0 | -2.755987 | 4.290881  | -0.728311 |
| 15 | 6  | 0 | -3.756367 | 1.692264  | -1.021915 |
| 16 | 8  | 0 | -0.545102 | -1.374645 | -1.762163 |
| 17 | 1  | 0 | -1.810756 | -3.605766 | -1.820055 |
| 18 | 1  | 0 | -3.776711 | -4.227260 | -0.423060 |
| 19 | 6  | 0 | -4.927443 | -2.683550 | 1.463043  |
| 20 | 7  | 0 | 1.546533  | 2.534892  | 0.788371  |
| 21 | 7  | 0 | 3.466384  | 2.375312  | 1.905244  |
| 22 | 6  | 0 | 3.576974  | 3.367832  | 0.952861  |
| 23 | 6  | 0 | 2.405871  | 3.487273  | 0.255268  |
| 24 | 6  | 0 | 2.245129  | 1.898916  | 1.781049  |
| 25 | 1  | 0 | 4.491627  | 3.930626  | 0.827511  |
| 26 | 1  | 0 | 2.105929  | 4.119345  | -0.565738 |
| 27 | 1  | 0 | 1.810523  | 1.104630  | 2.367519  |
| 28 | 6  | 0 | -3.774611 | -0.147930 | 1.723873  |
| 29 | 8  | 0 | 0.554882  | -0.046070 | 0.534677  |
| 30 | 22 | 0 | 1.054410  | -1.156294 | -0.875968 |
| 31 | 8  | 0 | 2.194611  | -0.383528 | -1.986470 |
| 32 | 8  | 0 | 1.679909  | -2.653034 | -0.193532 |
| 33 | 6  | 0 | 3.464456  | -0.216251 | -2.612025 |
| 34 | 6  | 0 | 2.124356  | -3.949851 | 0.182331  |
| 35 | 6  | 0 | 3.528005  | -1.099617 | -3.857297 |
| 36 | 1  | 0 | 4.231393  | -0.544042 | -1.895609 |
| 37 | 6  | 0 | 3.669332  | 1.265198  | -2.921385 |
| 38 | 6  | 0 | 3.612413  | -4.086497 | -0.135593 |
| 39 | 1  | 0 | 1.556429  | -4.670496 | -0.423712 |
| 40 | 6  | 0 | 1.804527  | -4.173247 | 1.659399  |
| 41 | 1  | 0 | 4.902485  | 1.590267  | 3.074653  |
| 42 | 7  | 0 | 6.514872  | 0.590144  | 4.285415  |
| 43 | 6  | 0 | 5.684731  | 1.109047  | 3.665885  |
| 44 | 6  | 0 | -4.026718 | 4.096379  | -1.217426 |
| 45 | 6  | 0 | -4.523072 | 2.781181  | -1.373783 |
| 46 | 6  | 0 | -4.816799 | -0.529510 | 2.540231  |
| 47 | 6  | 0 | -5.410174 | -1.805846 | 2.406392  |
| 48 | 1  | 0 | -2.354151 | 5.295095  | -0.615561 |
| 49 | 1  | 0 | -4.644656 | 4.946445  | -1.492597 |
| 50 | 1  | 0 | -5.519318 | 2.627134  | -1.779251 |
| 51 | 1  | 0 | -4.150023 | 0.691533  | -1.155329 |
| 52 | 1  | 0 | -3.328254 | 0.831921  | 1.848776  |
| 53 | 1  | 0 | -5.183761 | 0.157635  | 3.297963  |
| 54 | 1  | 0 | -6.235040 | -2.092247 | 3.052836  |
| 55 | 1  | 0 | -5.362276 | -3.674853 | 1.357049  |
| 56 | 1  | 0 | 2.749993  | -0.807252 | -4.571150 |
| 57 | 1  | 0 | 3.377883  | -2.152216 | -3.594119 |
| 58 | 1  | 0 | 4.503751  | -1.002928 | -4.346616 |
| 59 | 1  | 0 | 3.595357  | 1.862176  | -2.007240 |
| 60 | 1  | 0 | 2.909760  | 1.614472  | -3.629913 |
| 61 | 1  | 0 | 4.658700  | 1.428068  | -3.363914 |
| 62 | 1  | 0 | 4.196586  | -3.370797 | 0.453543  |
| 63 | 1  | 0 | 3.798832  | -3.897877 | -1.198027 |
| 64 | 1  | 0 | 3.962878  | -5.097164 | 0.101982  |
| 65 | 1  | 0 | 0.733534  | -4.044755 | 1.844278  |
| 66 | 1  | 0 | 2.352853  | -3.457142 | 2.281182  |
| 67 | 1  | 0 | 2.090761  | -5.186682 | 1.962623  |

E<sub>ZPE</sub>: B3LYP/6-31G\* = -2474.93631 (a.u.)

Gsol: B3LYP/6-311++G\*\*/(SMD,M06-2X/6-31G\*,CH2Cl2) = -2475.50574 (a.u.)

Int<sub>2</sub>

Standard orientation:

| Center Number | Atomic Number | Atomic Type | Coordinates (Angstroms) |           |           |
|---------------|---------------|-------------|-------------------------|-----------|-----------|
|               |               |             | X                       | Y         | Z         |
| 1             | 6             | 0           | -5.945418               | 1.247315  | -1.073480 |
| 2             | 7             | 0           | -6.727371               | 0.495157  | -0.665256 |
| 3             | 6             | 0           | 3.016510                | -3.299206 | 0.710867  |
| 4             | 6             | 0           | 3.711463                | -2.428999 | -0.171520 |
| 5             | 6             | 0           | 1.860845                | -2.894707 | 1.325025  |
| 6             | 6             | 0           | 1.354339                | -1.584153 | 1.113053  |
| 7             | 6             | 0           | 2.038269                | -0.654590 | 0.327741  |
| 8             | 6             | 0           | 3.214561                | -1.098658 | -0.377490 |
| 9             | 6             | 0           | 1.582482                | 0.765996  | 0.220730  |
| 10            | 6             | 0           | 2.431628                | 1.832902  | 0.680604  |
| 11            | 6             | 0           | 0.341853                | 1.082237  | -0.338900 |
| 12            | 6             | 0           | -0.020552               | 2.449620  | -0.569766 |
| 13            | 6             | 0           | 0.820863                | 3.468536  | -0.195646 |
| 14            | 6             | 0           | 2.050802                | 3.195354  | 0.449869  |
| 15            | 1             | 0           | 3.406778                | -4.300149 | 0.878939  |
| 16            | 6             | 0           | 4.875399                | -2.858723 | -0.861069 |
| 17            | 1             | 0           | 1.304014                | -3.552397 | 1.985494  |
| 18            | 6             | 0           | 3.904088                | -0.274412 | -1.310801 |
| 19            | 6             | 0           | 3.642121                | 1.597201  | 1.391499  |
| 20            | 8             | 0           | -0.536520               | 0.121774  | -0.709586 |
| 21            | 1             | 0           | 0.522429                | 4.499139  | -0.366357 |
| 22            | 6             | 0           | 2.894140                | 4.248748  | 0.893520  |
| 23            | 7             | 0           | -1.245635               | 2.753755  | -1.231352 |
| 24            | 22            | 0           | -1.237746               | -1.072053 | 0.533328  |
| 25            | 7             | 0           | -3.417845               | 2.811974  | -1.709009 |
| 26            | 6             | 0           | -2.737726               | 3.620054  | -2.596248 |
| 27            | 6             | 0           | -1.397763               | 3.604075  | -2.318116 |
| 28            | 6             | 0           | -2.498275               | 2.310033  | -0.909993 |
| 29            | 1             | 0           | -3.252798               | 4.156917  | -3.380670 |
| 30            | 1             | 0           | -0.546853               | 4.074170  | -2.786256 |
| 31            | 1             | 0           | -2.674773               | 1.635630  | -0.085274 |
| 32            | 8             | 0           | -2.597534               | -0.354174 | 1.418686  |
| 33            | 8             | 0           | -1.664285               | -2.569992 | -0.284378 |
| 34            | 6             | 0           | -3.907757               | -0.426225 | 1.995048  |
| 35            | 6             | 0           | -2.009121               | -3.781025 | -0.945465 |
| 36            | 1             | 0           | -4.626443               | -0.236208 | 1.187823  |
| 37            | 6             | 0           | -4.144694               | -1.824618 | 2.561568  |
| 38            | 6             | 0           | -4.030530               | 0.671586  | 3.049010  |
| 39            | 6             | 0           | -3.190932               | -3.523679 | -1.878783 |
| 40            | 6             | 0           | -0.778270               | -4.322455 | -1.670742 |
| 41            | 1             | 0           | -2.312335               | -4.492970 | -0.164267 |
| 42            | 8             | 0           | 0.167612                | -1.266331 | 1.712036  |
| 43            | 6             | 0           | 4.433223                | 2.640032  | 1.820327  |
| 44            | 6             | 0           | 4.065558                | 3.981387  | 1.562621  |
| 45            | 6             | 0           | 5.525788                | -2.027131 | -1.743636 |
| 46            | 6             | 0           | 5.023935                | -0.725901 | -1.974575 |
| 47            | 1             | 0           | 2.587420                | 5.274442  | 0.702324  |
| 48            | 1             | 0           | 4.701425                | 4.793932  | 1.902756  |
| 49            | 1             | 0           | 5.348122                | 2.429154  | 2.367413  |
| 50            | 1             | 0           | 3.936115                | 0.576623  | 1.606564  |
| 51            | 1             | 0           | 3.530510                | 0.723523  | -1.508897 |
| 52            | 1             | 0           | 5.524220                | -0.074723 | -2.686428 |
| 53            | 1             | 0           | 6.413295                | -2.368826 | -2.268987 |
| 54            | 1             | 0           | 5.238860                | -3.868271 | -0.682902 |
| 55            | 1             | 0           | -3.429704               | -2.040003 | 3.364516  |
| 56            | 1             | 0           | -4.031293               | -2.581980 | 1.778715  |
| 57            | 1             | 0           | -5.158535               | -1.903761 | 2.968877  |
| 58            | 1             | 0           | -3.839574               | 1.655222  | 2.608378  |
| 59            | 1             | 0           | -3.310459               | 0.508967  | 3.858837  |
| 60            | 1             | 0           | -5.040553               | 0.676608  | 3.473425  |
| 61            | 1             | 0           | -2.913327               | -2.800077 | -2.653187 |
| 62            | 1             | 0           | -4.046125               | -3.125481 | -1.323540 |
| 63            | 1             | 0           | -3.500246               | -4.454242 | -2.367990 |
| 64            | 1             | 0           | 0.054692                | -4.453248 | -0.973033 |

|    |   |   |           |           |           |
|----|---|---|-----------|-----------|-----------|
| 65 | 1 | 0 | -0.463154 | -3.627792 | -2.457238 |
| 66 | 1 | 0 | -1.003387 | -5.290869 | -2.131811 |
| 67 | 1 | 0 | -5.167137 | 1.931868  | -1.426690 |

-----  
E<sub>ZPE</sub>: B3LYP/6-31G\* = -2474.93679 (a.u.)  
Gsol: B3LYP/6-311++G\*\*/(SMD,M06-2X/6-31G\*,CH2Cl2) = -2475.50217 (a.u.)

TS<sub>1</sub>

Standard orientation:

| Center<br>Number | Atomic<br>Number | Atomic<br>Type | Coordinates (Angstroms) |           |           |
|------------------|------------------|----------------|-------------------------|-----------|-----------|
|                  |                  |                | X                       | Y         | Z         |
| 1                | 6                | 0              | 1.060685                | 3.381038  | -0.514491 |
| 2                | 6                | 0              | 2.311798                | 3.083256  | 0.073776  |
| 3                | 6                | 0              | 2.611442                | 1.727003  | 0.435681  |
| 4                | 6                | 0              | 1.675810                | 0.679048  | 0.131345  |
| 5                | 6                | 0              | 0.427950                | 1.019611  | -0.397164 |
| 6                | 6                | 0              | 0.132023                | 2.387762  | -0.705907 |
| 7                | 6                | 0              | 2.017898                | -0.753544 | 0.391317  |
| 8                | 6                | 0              | 1.257198                | -1.529895 | 1.270051  |
| 9                | 6                | 0              | 1.656324                | -2.846515 | 1.624419  |
| 10               | 6                | 0              | 2.770150                | -3.411313 | 1.062124  |
| 11               | 6                | 0              | 3.142962                | -1.370503 | -0.263967 |
| 12               | 6                | 0              | 3.528193                | -2.707045 | 0.088952  |
| 13               | 1                | 0              | 0.836535                | 4.407036  | -0.792981 |
| 14               | 6                | 0              | 3.255362                | 4.112263  | 0.340126  |
| 15               | 6                | 0              | 3.842870                | 1.483322  | 1.108142  |
| 16               | 8                | 0              | 0.106192                | -1.053422 | 1.824477  |
| 17               | 1                | 0              | 1.046484                | -3.381519 | 2.345774  |
| 18               | 1                | 0              | 3.073477                | -4.418553 | 1.337463  |
| 19               | 6                | 0              | 4.641619                | -3.310141 | -0.552513 |
| 20               | 7                | 0              | -1.194732               | 2.728045  | -1.133333 |
| 21               | 7                | 0              | -3.230860               | 2.533471  | -1.865908 |
| 22               | 6                | 0              | -3.168648               | 3.742906  | -1.208830 |
| 23               | 6                | 0              | -1.892246               | 3.876662  | -0.752052 |
| 24               | 6                | 0              | -2.046548               | 1.934643  | -1.808530 |
| 25               | 1                | 0              | -4.023213               | 4.392745  | -1.109610 |
| 26               | 1                | 0              | -1.426391               | 4.651754  | -0.166937 |
| 27               | 1                | 0              | -1.863470               | 0.946561  | -2.192818 |
| 28               | 6                | 0              | 3.884999                | -0.721277 | -1.291144 |
| 29               | 8                | 0              | -0.513038               | 0.095175  | -0.652502 |
| 30               | 22               | 0              | -1.349136               | -0.940422 | 0.681535  |
| 31               | 8                | 0              | -2.632764               | -0.066317 | 1.512595  |
| 32               | 8                | 0              | -1.811281               | -2.484681 | 0.000198  |
| 33               | 6                | 0              | -4.012634               | 0.213005  | 1.793933  |
| 34               | 6                | 0              | -2.411516               | -3.530785 | -0.772075 |
| 35               | 6                | 0              | -4.560985               | -0.868166 | 2.721673  |
| 36               | 1                | 0              | -4.543465               | 0.188976  | 0.833016  |
| 37               | 6                | 0              | -4.099306               | 1.611639  | 2.400817  |
| 38               | 6                | 0              | -3.906972               | -3.593182 | -0.471483 |
| 39               | 1                | 0              | -1.925056               | -4.458851 | -0.440898 |
| 40               | 6                | 0              | -2.114607               | -3.288245 | -2.250731 |
| 41               | 1                | 0              | -4.046868               | 1.943680  | -2.128283 |
| 42               | 7                | 0              | -3.996598               | -0.186860 | -2.411033 |
| 43               | 6                | 0              | -4.860043               | 0.076902  | -1.647292 |
| 44               | 6                | 0              | 4.442882                | 3.832884  | 0.973171  |
| 45               | 6                | 0              | 4.727671                | 2.504817  | 1.371095  |
| 46               | 6                | 0              | 4.951405                | -1.340339 | -1.906125 |
| 47               | 6                | 0              | 5.346220                | -2.644285 | -1.529086 |
| 48               | 1                | 0              | 3.011606                | 5.130256  | 0.044956  |
| 49               | 1                | 0              | 5.155141                | 4.626551  | 1.179776  |
| 50               | 1                | 0              | 5.655284                | 2.288569  | 1.893881  |
| 51               | 1                | 0              | 4.076160                | 0.474196  | 1.425443  |
| 52               | 1                | 0              | 3.593450                | 0.274539  | -1.604851 |
| 53               | 1                | 0              | 5.491342                | -0.821204 | -2.693621 |
| 54               | 1                | 0              | 6.192476                | -3.119059 | -2.017732 |
| 55               | 1                | 0              | 4.919462                | -4.321053 | -0.262992 |
| 56               | 1                | 0              | -4.014733               | -0.878398 | 3.672438  |
| 57               | 1                | 0              | -4.473016               | -1.854644 | 2.255965  |



|    |   |   |           |           |           |
|----|---|---|-----------|-----------|-----------|
| 58 | 1 | 0 | -5.620861 | -0.684534 | 2.931005  |
| 59 | 1 | 0 | -3.676284 | 2.355118  | 1.716916  |
| 60 | 1 | 0 | -3.550026 | 1.659871  | 3.348288  |
| 61 | 1 | 0 | -5.145845 | 1.876143  | 2.590463  |
| 62 | 1 | 0 | -4.395080 | -2.667191 | -0.791859 |
| 63 | 1 | 0 | -4.081330 | -3.744390 | 0.599706  |
| 64 | 1 | 0 | -4.360764 | -4.432068 | -1.011993 |
| 65 | 1 | 0 | -1.034553 | -3.218120 | -2.419957 |
| 66 | 1 | 0 | -2.596296 | -2.362891 | -2.584165 |
| 67 | 1 | 0 | -2.502476 | -4.122040 | -2.847792 |

-----  
 E<sub>ZPE</sub>: B3LYP/6-31G\* = -2474.89123 (a.u.)  
 Gsol: B3LYP/6-311++G\*\*/(SMD,M06-2X/6-31G\*,CH2Cl2) = -2475.47565 (a.u.)

## TS<sub>2</sub>

Standard orientation:

| Center<br>Number | Atomic<br>Number | Atomic<br>Type | Coordinates (Angstroms) |           |           |
|------------------|------------------|----------------|-------------------------|-----------|-----------|
|                  |                  |                | X                       | Y         | Z         |
| 1                | 6                | 0              | -5.853367               | 0.892896  | -1.665137 |
| 2                | 7                | 0              | -5.111400               | 0.859396  | -0.741682 |
| 3                | 6                | 0              | 2.959075                | -3.483406 | 0.570153  |
| 4                | 6                | 0              | 3.679893                | -2.610019 | -0.287316 |
| 5                | 6                | 0              | 1.819668                | -3.061412 | 1.201889  |
| 6                | 6                | 0              | 1.352726                | -1.730261 | 1.033671  |
| 7                | 6                | 0              | 2.063520                | -0.801954 | 0.268145  |
| 8                | 6                | 0              | 3.223419                | -1.259800 | -0.454470 |
| 9                | 6                | 0              | 1.639566                | 0.629753  | 0.183695  |
| 10               | 6                | 0              | 2.508265                | 1.682211  | 0.640659  |
| 11               | 6                | 0              | 0.398488                | 0.971999  | -0.359815 |
| 12               | 6                | 0              | 0.075967                | 2.350299  | -0.583271 |
| 13               | 6                | 0              | 0.929936                | 3.359984  | -0.220210 |
| 14               | 6                | 0              | 2.155562                | 3.055887  | 0.420027  |
| 15               | 1                | 0              | 3.315577                | -4.501868 | 0.703917  |
| 16               | 6                | 0              | 4.828849                | -3.056085 | -0.991520 |
| 17               | 1                | 0              | 1.243797                | -3.721502 | 1.843013  |
| 18               | 6                | 0              | 3.936653                | -0.433126 | -1.368109 |
| 19               | 6                | 0              | 3.718169                | 1.418220  | 1.342735  |
| 20               | 8                | 0              | -0.513041               | 0.044307  | -0.717200 |
| 21               | 1                | 0              | 0.652549                | 4.396975  | -0.389716 |
| 22               | 6                | 0              | 3.022833                | 4.089430  | 0.864609  |
| 23               | 7                | 0              | -1.157396               | 2.655466  | -1.248129 |
| 24               | 22               | 0              | -1.289385               | -1.024621 | 0.619403  |
| 25               | 7                | 0              | -3.251515               | 2.557182  | -1.813893 |
| 26               | 6                | 0              | -2.623359               | 3.326505  | -2.767628 |
| 27               | 6                | 0              | -1.305585               | 3.394933  | -2.418985 |
| 28               | 6                | 0              | -2.362176               | 2.160119  | -0.915968 |
| 29               | 1                | 0              | -3.153483               | 3.747686  | -3.606799 |
| 30               | 1                | 0              | -0.461772               | 3.869237  | -2.893469 |
| 31               | 1                | 0              | -2.591455               | 1.534586  | -0.068772 |
| 32               | 8                | 0              | -2.420318               | -0.080762 | 1.590351  |
| 33               | 8                | 0              | -2.034477               | -2.423117 | -0.134905 |
| 34               | 6                | 0              | -3.708494               | 0.115133  | 2.214498  |
| 35               | 6                | 0              | -3.005310               | -3.283374 | -0.739808 |
| 36               | 1                | 0              | -4.396045               | 0.389360  | 1.405401  |
| 37               | 6                | 0              | -4.155016               | -1.192322 | 2.862216  |
| 38               | 6                | 0              | -3.578843               | 1.260488  | 3.214588  |
| 39               | 6                | 0              | -3.632112               | -2.577188 | -1.939657 |
| 40               | 6                | 0              | -2.325398               | -4.603237 | -1.096556 |
| 41               | 1                | 0              | -3.778052               | -3.465873 | 0.019817  |
| 42               | 8                | 0              | 0.194710                | -1.389193 | 1.663240  |
| 43               | 6                | 0              | 4.532035                | 2.442315  | 1.773079  |
| 44               | 6                | 0              | 4.191454                | 3.793087  | 1.525534  |
| 45               | 6                | 0              | 5.504160                | -2.221495 | -1.852164 |
| 46               | 6                | 0              | 5.041587                | -0.899944 | -2.046157 |
| 47               | 1                | 0              | 2.736909                | 5.122528  | 0.681575  |
| 48               | 1                | 0              | 4.845976                | 4.589666  | 1.867439  |
| 49               | 1                | 0              | 5.445104                | 2.209629  | 2.314055  |
| 50               | 1                | 0              | 3.991191                | 0.390097  | 1.548543  |

|    |   |   |           |           |           |
|----|---|---|-----------|-----------|-----------|
| 51 | 1 | 0 | 3.594246  | 0.580513  | -1.541495 |
| 52 | 1 | 0 | 5.559917  | -0.244981 | -2.741507 |
| 53 | 1 | 0 | 6.379747  | -2.575855 | -2.388826 |
| 54 | 1 | 0 | 5.160086  | -4.081258 | -0.842578 |
| 55 | 1 | 0 | -3.452014 | -1.503160 | 3.644802  |
| 56 | 1 | 0 | -4.224743 | -1.988875 | 2.114052  |
| 57 | 1 | 0 | -5.144757 | -1.067837 | 3.315319  |
| 58 | 1 | 0 | -3.240463 | 2.175804  | 2.717587  |
| 59 | 1 | 0 | -2.862803 | 1.010968  | 4.006246  |
| 60 | 1 | 0 | -4.551628 | 1.465687  | 3.675114  |
| 61 | 1 | 0 | -2.864066 | -2.355470 | -2.690107 |
| 62 | 1 | 0 | -4.122076 | -1.643038 | -1.645505 |
| 63 | 1 | 0 | -4.385125 | -3.226180 | -2.401495 |
| 64 | 1 | 0 | -1.872777 | -5.059815 | -0.210244 |
| 65 | 1 | 0 | -1.539798 | -4.438842 | -1.842411 |
| 66 | 1 | 0 | -3.057174 | -5.304717 | -1.512520 |
| 67 | 1 | 0 | -4.226177 | 2.146189  | -1.746604 |

E<sub>ZPE</sub>: B3LYP/6-31G\* = -2474.89308 (a.u.)

Gsol: B3LYP/6-311++G\*\*/(SMD,M06-2X/6-31G\*,CH2Cl2) = -2475.48242 (a.u.)

### Int<sub>3</sub>

Standard orientation:

| Center<br>Number | Atomic<br>Number | Atomic<br>Type | Coordinates (Angstroms) |           |           |
|------------------|------------------|----------------|-------------------------|-----------|-----------|
|                  |                  |                | X                       | Y         | Z         |
| 1                | 6                | 0              | -0.660706               | 3.378509  | 0.098500  |
| 2                | 6                | 0              | -1.970107               | 3.163071  | -0.395468 |
| 3                | 6                | 0              | -2.457108               | 1.821222  | -0.527830 |
| 4                | 6                | 0              | -1.622552               | 0.718108  | -0.132864 |
| 5                | 6                | 0              | -0.308875               | 0.973806  | 0.265909  |
| 6                | 6                | 0              | 0.161728                | 2.320019  | 0.398590  |
| 7                | 6                | 0              | -2.152414               | -0.679971 | -0.162451 |
| 8                | 6                | 0              | -1.602313               | -1.647843 | -1.005009 |
| 9                | 6                | 0              | -2.178476               | -2.940240 | -1.126441 |
| 10               | 6                | 0              | -3.268223               | -3.287276 | -0.372293 |
| 11               | 6                | 0              | -3.254310               | -1.062258 | 0.682666  |
| 12               | 6                | 0              | -3.822694               | -2.374575 | 0.564308  |
| 13               | 1                | 0              | -0.303093               | 4.395362  | 0.233269  |
| 14               | 6                | 0              | -2.801094               | 4.253996  | -0.765777 |
| 15               | 6                | 0              | -3.758422               | 1.640856  | -1.075036 |
| 16               | 8                | 0              | -0.491012               | -1.384383 | -1.753973 |
| 17               | 1                | 0              | -1.727758               | -3.631707 | -1.831707 |
| 18               | 1                | 0              | -3.711058               | -4.275565 | -0.469666 |
| 19               | 6                | 0              | -4.914188               | -2.744095 | 1.393476  |
| 20               | 7                | 0              | 1.503941                | 2.558994  | 0.812522  |
| 21               | 7                | 0              | 3.417151                | 2.411410  | 1.933109  |
| 22               | 6                | 0              | 3.526335                | 3.411795  | 0.989411  |
| 23               | 6                | 0              | 2.356757                | 3.522772  | 0.288905  |
| 24               | 6                | 0              | 2.200522                | 1.922412  | 1.802770  |
| 25               | 1                | 0              | 4.437274                | 3.981811  | 0.873570  |
| 26               | 1                | 0              | 2.054677                | 4.156816  | -0.529574 |
| 27               | 1                | 0              | 1.774712                | 1.118940  | 2.382398  |
| 28               | 6                | 0              | -3.797994               | -0.193960 | 1.671116  |
| 29               | 8                | 0              | 0.551474                | -0.033502 | 0.553958  |
| 30               | 22               | 0              | 1.086564                | -1.164483 | -0.828304 |
| 31               | 8                | 0              | 2.256841                | -0.409642 | -1.916868 |
| 32               | 8                | 0              | 1.683698                | -2.653188 | -0.106167 |
| 33               | 6                | 0              | 3.524254                | -0.219984 | -2.540399 |
| 34               | 6                | 0              | 2.211621                | -3.899440 | 0.328569  |
| 35               | 6                | 0              | 3.598182                | -1.090288 | -3.794183 |
| 36               | 1                | 0              | 4.294391                | -0.545674 | -1.826626 |
| 37               | 6                | 0              | 3.711071                | 1.266754  | -2.835525 |
| 38               | 6                | 0              | 3.619747                | -4.081415 | -0.235812 |
| 39               | 1                | 0              | 1.554253                | -4.681036 | -0.078390 |
| 40               | 6                | 0              | 2.167423                | -3.949060 | 1.854807  |
| 41               | 6                | 0              | -4.060656               | 4.040925  | -1.275414 |
| 42               | 6                | 0              | -4.534931               | 2.718501  | -1.439699 |
| 43               | 6                | 0              | -4.849419               | -0.587696 | 2.469711  |

|    |   |   |           |           |           |
|----|---|---|-----------|-----------|-----------|
| 44 | 6 | 0 | -5.424333 | -1.871474 | 2.327088  |
| 45 | 1 | 0 | -2.415844 | 5.263959  | -0.646771 |
| 46 | 1 | 0 | -4.686486 | 4.881801  | -1.560668 |
| 47 | 1 | 0 | -5.521992 | 2.549915  | -1.861468 |
| 48 | 1 | 0 | -4.135310 | 0.634551  | -1.214583 |
| 49 | 1 | 0 | -3.366135 | 0.791498  | 1.802698  |
| 50 | 1 | 0 | -5.238043 | 0.095532  | 3.220126  |
| 51 | 1 | 0 | -6.256735 | -2.167528 | 2.959341  |
| 52 | 1 | 0 | -5.334556 | -3.740921 | 1.281300  |
| 53 | 1 | 0 | 2.817569  | -0.799364 | -4.505778 |
| 54 | 1 | 0 | 3.459464  | -2.146852 | -3.541318 |
| 55 | 1 | 0 | 4.573230  | -0.978117 | -4.281573 |
| 56 | 1 | 0 | 3.628520  | 1.854805  | -1.916329 |
| 57 | 1 | 0 | 2.948418  | 1.613175  | -3.542166 |
| 58 | 1 | 0 | 4.699038  | 1.445866  | -3.274821 |
| 59 | 1 | 0 | 4.290485  | -3.306734 | 0.152428  |
| 60 | 1 | 0 | 3.608982  | -4.019007 | -1.329115 |
| 61 | 1 | 0 | 4.021752  | -5.060035 | 0.049271  |
| 62 | 1 | 0 | 1.145751  | -3.793476 | 2.214950  |
| 63 | 1 | 0 | 2.809044  | -3.170303 | 2.281482  |
| 64 | 1 | 0 | 2.518275  | -4.922868 | 2.214361  |
| 65 | 1 | 0 | 4.684411  | 1.686098  | 2.973268  |
| 66 | 6 | 0 | 6.221823  | 0.643196  | 4.175417  |
| 67 | 7 | 0 | 5.407548  | 1.206056  | 3.542501  |

E<sub>ZPE</sub>: B3LYP/6-31G\* = -2474.917374 (a.u.)

Gsol: B3LYP/6-311++G\*\*/(SMD,M06-2X/6-31G\*,CH2Cl2) = -2475.49175 (a.u.)

#### Int<sub>4</sub>

Standard orientation:

| Center<br>Number | Atomic<br>Number | Atomic<br>Type | Coordinates (Angstroms) |           |           |
|------------------|------------------|----------------|-------------------------|-----------|-----------|
|                  |                  |                | X                       | Y         | Z         |
| 1                | 7                | 0              | -5.800463               | 1.338424  | -1.097902 |
| 2                | 6                | 0              | -6.587093               | 0.583251  | -0.661086 |
| 3                | 1                | 0              | -5.023672               | 1.954693  | -1.425510 |
| 4                | 6                | 0              | 3.049630                | -3.268164 | 0.717421  |
| 5                | 6                | 0              | 3.736147                | -2.388915 | -0.162649 |
| 6                | 6                | 0              | 1.888293                | -2.877761 | 1.330137  |
| 7                | 6                | 0              | 1.366941                | -1.572986 | 1.118739  |
| 8                | 6                | 0              | 2.040894                | -0.635162 | 0.334608  |
| 9                | 6                | 0              | 3.223762                | -1.064432 | -0.368687 |
| 10               | 6                | 0              | 1.564897                | 0.778375  | 0.224605  |
| 11               | 6                | 0              | 2.396937                | 1.859374  | 0.682644  |
| 12               | 6                | 0              | 0.319352                | 1.073860  | -0.335427 |
| 13               | 6                | 0              | -0.063535               | 2.435526  | -0.566449 |
| 14               | 6                | 0              | 0.761089                | 3.468937  | -0.195537 |
| 15               | 6                | 0              | 1.995556                | 3.215703  | 0.449477  |
| 16               | 1                | 0              | 3.451123                | -4.264678 | 0.885141  |
| 17               | 6                | 0              | 4.906514                | -2.804255 | -0.850122 |
| 18               | 1                | 0              | 1.337940                | -3.542691 | 1.988739  |
| 19               | 6                | 0              | 3.905026                | -0.231570 | -1.300466 |
| 20               | 6                | 0              | 3.610611                | 1.643479  | 1.394430  |
| 21               | 8                | 0              | -0.544270               | 0.100311  | -0.704895 |
| 22               | 1                | 0              | 0.445922                | 4.494486  | -0.366762 |
| 23               | 6                | 0              | 2.822635                | 4.282679  | 0.891336  |
| 24               | 7                | 0              | -1.297411               | 2.717630  | -1.223332 |
| 25               | 22               | 0              | -1.234213               | -1.102162 | 0.539060  |
| 26               | 7                | 0              | -3.465731               | 2.719741  | -1.698091 |
| 27               | 6                | 0              | -2.811470               | 3.539421  | -2.593500 |
| 28               | 6                | 0              | -1.471737               | 3.556290  | -2.316146 |
| 29               | 6                | 0              | -2.533950               | 2.244470  | -0.895226 |
| 30               | 1                | 0              | -3.342900               | 4.057043  | -3.379334 |
| 31               | 1                | 0              | -0.633614               | 4.044453  | -2.788465 |
| 32               | 1                | 0              | -2.697428               | 1.570349  | -0.068121 |
| 33               | 8                | 0              | -2.603061               | -0.398447 | 1.420082  |
| 34               | 8                | 0              | -1.636490               | -2.608792 | -0.273644 |
| 35               | 6                | 0              | -3.926312               | -0.475394 | 1.968915  |
| 36               | 6                | 0              | -1.904587               | -3.836056 | -0.940430 |

|    |   |   |           |           |           |
|----|---|---|-----------|-----------|-----------|
| 37 | 1 | 0 | -4.628149 | -0.285023 | 1.147415  |
| 38 | 6 | 0 | -4.169426 | -1.875164 | 2.528905  |
| 39 | 6 | 0 | -4.073649 | 0.620770  | 3.021283  |
| 40 | 6 | 0 | -3.190385 | -3.694314 | -1.752980 |
| 41 | 6 | 0 | -0.694586 | -4.217088 | -1.792015 |
| 42 | 1 | 0 | -2.051214 | -4.595000 | -0.158377 |
| 43 | 8 | 0 | 0.175679  | -1.269487 | 1.716283  |
| 44 | 6 | 0 | 4.385436  | 2.699064  | 1.821700  |
| 45 | 6 | 0 | 3.997669  | 4.034278  | 1.561333  |
| 46 | 6 | 0 | 5.548602  | -1.964430 | -1.730969 |
| 47 | 6 | 0 | 5.031513  | -0.669247 | -1.962294 |
| 48 | 1 | 0 | 2.500391  | 5.303237  | 0.698408  |
| 49 | 1 | 0 | 4.620948  | 4.856935  | 1.900283  |
| 50 | 1 | 0 | 5.303059  | 2.503114  | 2.369689  |
| 51 | 1 | 0 | 3.919847  | 0.627894  | 1.611518  |
| 52 | 1 | 0 | 3.519900  | 0.761826  | -1.499134 |
| 53 | 1 | 0 | 5.525213  | -0.011756 | -2.672897 |
| 54 | 1 | 0 | 6.441189  | -2.295123 | -2.254663 |
| 55 | 1 | 0 | 5.281682  | -3.809433 | -0.671751 |
| 56 | 1 | 0 | -3.470315 | -2.089332 | 3.346120  |
| 57 | 1 | 0 | -4.037882 | -2.631498 | 1.747912  |
| 58 | 1 | 0 | -5.191146 | -1.957613 | 2.915255  |
| 59 | 1 | 0 | -3.879724 | 1.605683  | 2.584861  |
| 60 | 1 | 0 | -3.368982 | 0.460823  | 3.845151  |
| 61 | 1 | 0 | -5.091983 | 0.620748  | 3.425244  |
| 62 | 1 | 0 | -3.069510 | -2.928482 | -2.527112 |
| 63 | 1 | 0 | -4.027651 | -3.405886 | -1.109591 |
| 64 | 1 | 0 | -3.440225 | -4.643751 | -2.239842 |
| 65 | 1 | 0 | 0.206682  | -4.282803 | -1.174542 |
| 66 | 1 | 0 | -0.526137 | -3.465690 | -2.571330 |
| 67 | 1 | 0 | -0.858957 | -5.187430 | -2.274219 |

E<sub>ZPE</sub>: B3LYP/6-31G\* = -2474.918564 (a.u.)

Gsol: B3LYP/6-311++G\*\*/(SMD,M06-2X/6-31G\*,CH2Cl2) = -2475.48659 (a.u.)

### Int<sub>5</sub>

Standard orientation:

| Center Number | Atomic Number | Atomic Type | Coordinates (Angstroms) |           |           |
|---------------|---------------|-------------|-------------------------|-----------|-----------|
|               |               |             | X                       | Y         | Z         |
| 1             | 6             | 0           | 2.058102                | 3.458282  | 0.170821  |
| 2             | 6             | 0           | 3.304886                | 2.981967  | 0.639248  |
| 3             | 6             | 0           | 3.561901                | 1.571247  | 0.624627  |
| 4             | 6             | 0           | 2.570621                | 0.669612  | 0.104664  |
| 5             | 6             | 0           | 1.315840                | 1.169162  | -0.254724 |
| 6             | 6             | 0           | 1.080836                | 2.582992  | -0.238627 |
| 7             | 6             | 0           | 2.851905                | -0.792008 | -0.014834 |
| 8             | 6             | 0           | 2.058837                | -1.711442 | 0.669080  |
| 9             | 6             | 0           | 2.373139                | -3.096439 | 0.675456  |
| 10            | 6             | 0           | 3.441927                | -3.568713 | -0.040760 |
| 11            | 6             | 0           | 3.926579                | -1.288119 | -0.832775 |
| 12            | 6             | 0           | 4.231480                | -2.690889 | -0.830453 |
| 13            | 1             | 0           | 1.872467                | 4.528343  | 0.142289  |
| 14            | 6             | 0           | 4.294574                | 3.876279  | 1.128576  |
| 15            | 6             | 0           | 4.803172                | 1.123410  | 1.161070  |
| 16            | 8             | 0           | 0.958551                | -1.306084 | 1.358297  |
| 17            | 1             | 0           | 1.741079                | -3.757692 | 1.259844  |
| 18            | 1             | 0           | 3.685461                | -4.628659 | -0.030436 |
| 19            | 6             | 0           | 5.300580                | -3.177216 | -1.628056 |
| 20            | 7             | 0           | -0.194428               | 3.091938  | -0.630030 |
| 21            | 7             | 0           | -2.059419               | 3.421970  | -1.787098 |
| 22            | 6             | 0           | -2.021431               | 4.316520  | -0.736948 |
| 23            | 6             | 0           | -0.877219               | 4.131548  | -0.012193 |
| 24            | 6             | 0           | -0.955080               | 2.704071  | -1.693855 |
| 25            | 1             | 0           | -2.819246               | 5.025921  | -0.569104 |
| 26            | 1             | 0           | -0.493365               | 4.606851  | 0.876505  |
| 27            | 1             | 0           | -0.665886               | 1.894184  | -2.343880 |
| 28            | 6             | 0           | 4.697252                | -0.446837 | -1.684613 |
| 29            | 8             | 0           | 0.310622                | 0.365983  | -0.646147 |

|    |    |   |           |           |           |
|----|----|---|-----------|-----------|-----------|
| 30 | 22 | 0 | -0.590992 | -0.928226 | 0.396756  |
| 31 | 8  | 0 | -1.517099 | -0.500867 | 1.881880  |
| 32 | 8  | 0 | -0.903065 | -2.489776 | -0.412314 |
| 33 | 6  | 0 | -1.211121 | -0.157652 | 3.234951  |
| 34 | 6  | 0 | -1.774364 | -3.565678 | -0.716311 |
| 35 | 6  | 0 | -1.904082 | -1.148562 | 4.169335  |
| 36 | 6  | 0 | -1.633036 | 1.289030  | 3.489881  |
| 37 | 1  | 0 | -0.123508 | -0.248709 | 3.360519  |
| 38 | 6  | 0 | -2.005688 | -4.420138 | 0.531026  |
| 39 | 6  | 0 | -1.176999 | -4.361003 | -1.877045 |
| 40 | 1  | 0 | -2.736279 | -3.135365 | -1.036038 |
| 41 | 1  | 0 | -3.385284 | 3.101131  | -2.830267 |
| 42 | 6  | 0 | 5.489933  | 3.406756  | 1.619843  |
| 43 | 6  | 0 | 5.735560  | 2.013455  | 1.645765  |
| 44 | 6  | 0 | 5.718847  | -0.952855 | -2.458224 |
| 45 | 6  | 0 | 6.036221  | -2.330448 | -2.425172 |
| 46 | 1  | 0 | 4.081561  | 4.942850  | 1.116502  |
| 47 | 1  | 0 | 6.238496  | 4.097962  | 1.997045  |
| 48 | 1  | 0 | 6.670205  | 1.640170  | 2.055745  |
| 49 | 1  | 0 | 5.006971  | 0.059903  | 1.195512  |
| 50 | 1  | 0 | 4.463349  | 0.610690  | -1.730983 |
| 51 | 1  | 0 | 6.283807  | -0.285701 | -3.104047 |
| 52 | 1  | 0 | 6.848534  | -2.716280 | -3.035034 |
| 53 | 1  | 0 | 5.520266  | -4.242389 | -1.603923 |
| 54 | 1  | 0 | -1.645599 | -0.936476 | 5.213351  |
| 55 | 1  | 0 | -2.993880 | -1.082823 | 4.066239  |
| 56 | 1  | 0 | -1.593723 | -2.173034 | 3.939763  |
| 57 | 1  | 0 | -1.375969 | 1.590577  | 4.512068  |
| 58 | 1  | 0 | -1.126710 | 1.965331  | 2.793192  |
| 59 | 1  | 0 | -2.714690 | 1.404722  | 3.355604  |
| 60 | 1  | 0 | -2.708948 | -5.233785 | 0.318838  |
| 61 | 1  | 0 | -1.061229 | -4.858735 | 0.872476  |
| 62 | 1  | 0 | -2.416619 | -3.811441 | 1.343724  |
| 63 | 1  | 0 | -1.845483 | -5.178920 | -2.170206 |
| 64 | 1  | 0 | -1.019978 | -3.711310 | -2.743653 |
| 65 | 1  | 0 | -0.209438 | -4.785084 | -1.587207 |
| 66 | 6  | 0 | -5.190128 | 2.319193  | -3.869160 |
| 67 | 7  | 0 | -4.231852 | 2.773064  | -3.364115 |
| 68 | 8  | 0 | -2.387434 | -0.247149 | -0.789286 |
| 69 | 6  | 0 | -3.527653 | 0.005386  | -1.178571 |
| 70 | 1  | 0 | -3.654867 | 0.454272  | -2.176534 |
| 71 | 6  | 0 | -4.762035 | -0.240499 | -0.434585 |
| 72 | 6  | 0 | -4.742003 | -0.776623 | 0.867071  |
| 73 | 6  | 0 | -5.985008 | 0.068153  | -1.056949 |
| 74 | 6  | 0 | -5.941748 | -1.009482 | 1.528623  |
| 75 | 1  | 0 | -3.786649 | -0.979431 | 1.340733  |
| 76 | 6  | 0 | -7.181888 | -0.170392 | -0.385532 |
| 77 | 1  | 0 | -5.989630 | 0.503869  | -2.053612 |
| 78 | 6  | 0 | -7.158979 | -0.711171 | 0.902342  |
| 79 | 1  | 0 | -5.936900 | -1.420783 | 2.534217  |
| 80 | 1  | 0 | -8.128271 | 0.066746  | -0.862307 |
| 81 | 1  | 0 | -8.093288 | -0.896976 | 1.425725  |

E<sub>ZPE</sub>: B3LYP/6-31G\* = -2820.39369 (a.u.)

Gsol: B3LYP/6-311++G\*\*/(SMD,M06-2X/6-31G\*,CH2Cl2) = -2821.06851 (a.u.)

#### Int<sub>6</sub>

Standard orientation:

| Center Number | Atomic Number | Atomic Type | Coordinates (Angstroms) |           |           |
|---------------|---------------|-------------|-------------------------|-----------|-----------|
|               |               |             | X                       | Y         | Z         |
| 1             | 6             | 0           | -1.412037               | -3.471122 | 0.547882  |
| 2             | 6             | 0           | -2.758356               | -3.171768 | 0.864440  |
| 3             | 6             | 0           | -3.250626               | -1.845276 | 0.630001  |
| 4             | 6             | 0           | -2.379015               | -0.847024 | 0.074205  |
| 5             | 6             | 0           | -1.026873               | -1.149080 | -0.105103 |
| 6             | 6             | 0           | -0.564315               | -2.490036 | 0.092215  |
| 7             | 6             | 0           | -2.892727               | 0.508617  | -0.282706 |
| 8             | 6             | 0           | -2.367775               | 1.642680  | 0.334940  |

|    |    |   |           |           |           |
|----|----|---|-----------|-----------|-----------|
| 9  | 6  | 0 | -2.920651 | 2.930070  | 0.096390  |
| 10 | 6  | 0 | -3.947969 | 3.092965  | -0.796567 |
| 11 | 6  | 0 | -3.921413 | 0.678773  | -1.274311 |
| 12 | 6  | 0 | -4.461709 | 1.985500  | -1.521835 |
| 13 | 1  | 0 | -1.048219 | -4.488209 | 0.664652  |
| 14 | 6  | 0 | -3.624351 | -4.161584 | 1.401751  |
| 15 | 6  | 0 | -4.599368 | -1.568256 | 0.994230  |
| 16 | 8  | 0 | -1.325416 | 1.551050  | 1.197887  |
| 17 | 1  | 0 | -2.504716 | 3.770916  | 0.643203  |
| 18 | 1  | 0 | -4.371145 | 4.079199  | -0.973090 |
| 19 | 6  | 0 | -5.483479 | 2.150562  | -2.493650 |
| 20 | 7  | 0 | 0.796300  | -2.811289 | -0.193631 |
| 21 | 7  | 0 | 2.702896  | -3.015168 | -1.311714 |
| 22 | 6  | 0 | 2.793357  | -3.734897 | -0.137939 |
| 23 | 6  | 0 | 1.625246  | -3.625450 | 0.565557  |
| 24 | 6  | 0 | 1.500348  | -2.472925 | -1.312573 |
| 25 | 1  | 0 | 3.689499  | -4.279739 | 0.123132  |
| 26 | 1  | 0 | 1.306286  | -4.020296 | 1.517375  |
| 27 | 1  | 0 | 1.093385  | -1.829440 | -2.076618 |
| 28 | 6  | 0 | -4.419177 | -0.399391 | -2.060299 |
| 29 | 8  | 0 | -0.132557 | -0.215690 | -0.485220 |
| 30 | 22 | 0 | 0.414647  | 1.239800  | 0.585343  |
| 31 | 8  | 0 | 1.092500  | 1.123263  | 2.250769  |
| 32 | 8  | 0 | 0.714599  | 2.728172  | -0.347668 |
| 33 | 6  | 0 | 0.791285  | 1.040058  | 3.642286  |
| 34 | 6  | 0 | 0.755876  | 4.147347  | -0.386501 |
| 35 | 6  | 0 | 0.207604  | 2.366566  | 4.129664  |
| 36 | 1  | 0 | 1.750493  | 0.866442  | 4.153819  |
| 37 | 6  | 0 | -0.131456 | -0.149390 | 3.910429  |
| 38 | 6  | 0 | 2.149993  | 4.633655  | 0.011126  |
| 39 | 1  | 0 | 0.024507  | 4.522727  | 0.345599  |
| 40 | 6  | 0 | 0.340616  | 4.607898  | -1.783145 |
| 41 | 1  | 0 | 3.869205  | -2.855820 | -2.598386 |
| 42 | 7  | 0 | 4.583507  | -2.684822 | -3.344871 |
| 43 | 6  | 0 | 5.415253  | -2.435305 | -4.135604 |
| 44 | 8  | 0 | 2.511639  | 0.591454  | -0.053365 |
| 45 | 6  | 0 | 3.511476  | 0.631879  | 0.669549  |
| 46 | 1  | 0 | 3.381202  | 0.895587  | 1.732350  |
| 47 | 6  | 0 | 4.871469  | 0.365169  | 0.218484  |
| 48 | 6  | 0 | 5.143609  | -0.044794 | -1.099320 |
| 49 | 6  | 0 | 5.924514  | 0.531002  | 1.135581  |
| 50 | 6  | 0 | 6.455607  | -0.283827 | -1.491145 |
| 51 | 1  | 0 | 4.321679  | -0.185310 | -1.792518 |
| 52 | 6  | 0 | 7.237432  | 0.300380  | 0.737287  |
| 53 | 1  | 0 | 5.705092  | 0.844011  | 2.153954  |
| 54 | 6  | 0 | 7.499293  | -0.106598 | -0.574742 |
| 55 | 1  | 0 | 6.660059  | -0.626302 | -2.500607 |
| 56 | 1  | 0 | 8.053277  | 0.431891  | 1.442027  |
| 57 | 1  | 0 | 8.523728  | -0.293743 | -0.885478 |
| 58 | 6  | 0 | -4.925849 | -3.859560 | 1.727628  |
| 59 | 6  | 0 | -5.409505 | -2.544518 | 1.530011  |
| 60 | 6  | 0 | -5.401644 | -0.203301 | -3.006036 |
| 61 | 6  | 0 | -5.951552 | 1.081378  | -3.222401 |
| 62 | 1  | 0 | -3.232568 | -5.163965 | 1.559278  |
| 63 | 1  | 0 | -5.578821 | -4.621822 | 2.143541  |
| 64 | 1  | 0 | -6.431892 | -2.301020 | 1.806423  |
| 65 | 1  | 0 | -4.984618 | -0.565142 | 0.854845  |
| 66 | 1  | 0 | -4.004872 | -1.390820 | -1.917234 |
| 67 | 1  | 0 | -5.754477 | -1.045805 | -3.595156 |
| 68 | 1  | 0 | -6.730241 | 1.221490  | -3.967101 |
| 69 | 1  | 0 | -5.883643 | 3.148642  | -2.658418 |
| 70 | 1  | 0 | -0.742897 | 2.567776  | 3.626416  |
| 71 | 1  | 0 | 0.898591  | 3.189650  | 3.916621  |
| 72 | 1  | 0 | 0.034234  | 2.335259  | 5.211707  |
| 73 | 1  | 0 | 0.330237  | -1.078713 | 3.558791  |
| 74 | 1  | 0 | -1.083211 | -0.015251 | 3.387648  |
| 75 | 1  | 0 | -0.329239 | -0.249315 | 4.984001  |
| 76 | 1  | 0 | 2.899256  | 4.265337  | -0.698645 |
| 77 | 1  | 0 | 2.412175  | 4.273677  | 1.012079  |
| 78 | 1  | 0 | 2.189275  | 5.729031  | 0.018345  |

|    |   |   |           |          |           |
|----|---|---|-----------|----------|-----------|
| 79 | 1 | 0 | -0.656498 | 4.228496 | -2.025813 |
| 80 | 1 | 0 | 1.046130  | 4.232835 | -2.532855 |
| 81 | 1 | 0 | 0.322686  | 5.702737 | -1.837821 |

E<sub>ZPE</sub>: B3LYP/6-31G\* = -2820.38061 (a.u.)  
Gsol: B3LYP/6-311++G\*\*/(SMD,M06-2X/6-31G\*,CH2Cl2) = -2821.07185 (a.u.)

**Int<sub>7</sub>**

Standard orientation:

| Center Number | Atomic Number | Atomic Type | Coordinates (Angstroms) |           |           |
|---------------|---------------|-------------|-------------------------|-----------|-----------|
|               |               |             | X                       | Y         | Z         |
| 1             | 6             | 0           | 3.117101                | -3.706909 | 0.483633  |
| 2             | 6             | 0           | 3.945624                | -3.009069 | -0.435185 |
| 3             | 6             | 0           | 2.120457                | -3.054591 | 1.163334  |
| 4             | 6             | 0           | 1.922938                | -1.657709 | 0.987798  |
| 5             | 6             | 0           | 2.777735                | -0.903636 | 0.184596  |
| 6             | 6             | 0           | 3.768096                | -1.593891 | -0.599048 |
| 7             | 6             | 0           | 2.663674                | 0.584753  | 0.160218  |
| 8             | 6             | 0           | 3.779695                | 1.404370  | 0.550635  |
| 9             | 6             | 0           | 1.465913                | 1.197708  | -0.218708 |
| 10            | 6             | 0           | 1.413353                | 2.623214  | -0.361640 |
| 11            | 6             | 0           | 2.502031                | 3.406599  | -0.064324 |
| 12            | 6             | 0           | 3.700395                | 2.829256  | 0.415634  |
| 13            | 1             | 0           | 3.270714                | -4.774352 | 0.624666  |
| 14            | 6             | 0           | 4.930140                | -3.686667 | -1.201737 |
| 15            | 1             | 0           | 1.459167                | -3.577796 | 1.847270  |
| 16            | 6             | 0           | 4.575617                | -0.936155 | -1.570151 |
| 17            | 6             | 0           | 4.973362                | 0.863566  | 1.109064  |
| 18            | 8             | 0           | 0.350732                | 0.495101  | -0.487863 |
| 19            | 1             | 0           | 2.429843                | 4.485966  | -0.165933 |
| 20            | 6             | 0           | 4.805885                | 3.639473  | 0.789396  |
| 21            | 7             | 0           | 0.233080                | 3.250332  | -0.867060 |
| 22            | 22            | 0           | -0.627786               | -0.631456 | 0.651466  |
| 23            | 7             | 0           | -1.874492               | 3.904835  | -1.083041 |
| 24            | 6             | 0           | -1.107888               | 4.548730  | -2.032538 |
| 25            | 6             | 0           | 0.197408                | 4.161381  | -1.913565 |
| 26            | 6             | 0           | -1.043034               | 3.134361  | -0.404571 |
| 27            | 1             | 0           | -1.545683               | 5.240586  | -2.738011 |
| 28            | 1             | 0           | 1.088136                | 4.412162  | -2.467725 |
| 29            | 1             | 0           | -1.306548               | 2.482295  | 0.412899  |
| 30            | 8             | 0           | -1.558929               | 0.150627  | 1.960438  |
| 31            | 8             | 0           | -1.116986               | -2.239422 | 0.022393  |
| 32            | 6             | 0           | -2.707667               | 0.226252  | 2.792708  |
| 33            | 6             | 0           | -0.829812               | -3.327511 | -0.854478 |
| 34            | 1             | 0           | -3.575879               | 0.407424  | 2.141305  |
| 35            | 6             | 0           | -2.907292               | -1.097788 | 3.531504  |
| 36            | 6             | 0           | -2.544250               | 1.410846  | 3.744881  |
| 37            | 6             | 0           | -1.466252               | -4.597184 | -0.289893 |
| 38            | 6             | 0           | -1.317313               | -2.996620 | -2.265610 |
| 39            | 1             | 0           | 0.259940                | -3.460390 | -0.873464 |
| 40            | 8             | 0           | 0.885049                | -1.073675 | 1.639301  |
| 41            | 1             | 0           | -3.580757               | 3.945990  | -1.019921 |
| 42            | 6             | 0           | -5.781110               | 3.643200  | -1.179128 |
| 43            | 7             | 0           | -4.629909               | 3.847363  | -1.068587 |
| 44            | 8             | 0           | -2.414554               | 0.197173  | -0.639770 |
| 45            | 6             | 0           | -3.575113               | 0.418763  | -0.978456 |
| 46            | 6             | 0           | -4.725091               | -0.456746 | -0.730725 |
| 47            | 6             | 0           | -4.563512               | -1.740000 | -0.175475 |
| 48            | 6             | 0           | -5.679242               | -2.541176 | 0.038018  |
| 49            | 6             | 0           | -6.955949               | -2.067948 | -0.291486 |
| 50            | 6             | 0           | -7.120934               | -0.791807 | -0.834820 |
| 51            | 6             | 0           | -6.007526               | 0.015146  | -1.060219 |
| 52            | 1             | 0           | -3.798063               | 1.355104  | -1.516015 |
| 53            | 1             | 0           | -3.564018               | -2.087687 | 0.065532  |
| 54            | 1             | 0           | -5.562076               | -3.535426 | 0.460219  |
| 55            | 1             | 0           | -7.824758               | -2.698170 | -0.120340 |
| 56            | 1             | 0           | -8.113656               | -0.425857 | -1.079397 |
| 57            | 1             | 0           | -6.129194               | 1.019755  | -1.458694 |

|    |   |   |           |           |           |
|----|---|---|-----------|-----------|-----------|
| 58 | 6 | 0 | 5.949917  | 3.078104  | 1.305624  |
| 59 | 6 | 0 | 6.023364  | 1.675502  | 1.476250  |
| 60 | 6 | 0 | 5.703166  | -3.014067 | -2.120079 |
| 61 | 6 | 0 | 5.511366  | -1.625766 | -2.309608 |
| 62 | 1 | 0 | 4.722900  | 4.717313  | 0.669859  |
| 63 | 1 | 0 | 6.788451  | 3.705753  | 1.594153  |
| 64 | 1 | 0 | 6.917048  | 1.232818  | 1.907873  |
| 65 | 1 | 0 | 5.046231  | -0.206727 | 1.259671  |
| 66 | 1 | 0 | 4.438180  | 0.126179  | -1.736477 |
| 67 | 1 | 0 | 6.106257  | -1.096799 | -3.049618 |
| 68 | 1 | 0 | 6.449674  | -3.544573 | -2.704764 |
| 69 | 1 | 0 | 5.053731  | -4.757348 | -1.054305 |
| 70 | 1 | 0 | -2.044249 | -1.308263 | 4.172950  |
| 71 | 1 | 0 | -3.020828 | -1.924515 | 2.822144  |
| 72 | 1 | 0 | -3.805627 | -1.057214 | 4.158076  |
| 73 | 1 | 0 | -2.398328 | 2.340163  | 3.184889  |
| 74 | 1 | 0 | -1.674942 | 1.259217  | 4.394103  |
| 75 | 1 | 0 | -3.435154 | 1.524017  | 4.373104  |
| 76 | 1 | 0 | -2.558681 | -4.507865 | -0.267220 |
| 77 | 1 | 0 | -1.112998 | -4.782672 | 0.729479  |
| 78 | 1 | 0 | -1.206398 | -5.463020 | -0.909781 |
| 79 | 1 | 0 | -0.846042 | -2.078513 | -2.630978 |
| 80 | 1 | 0 | -2.404161 | -2.857318 | -2.278286 |
| 81 | 1 | 0 | -1.065696 | -3.810239 | -2.955789 |

E<sub>ZPE</sub>: B3LYP/6-31G\* = -2820.39071 (a.u.)

Gsol: B3LYP/6-311++G\*\*/(SMD,M06-2X/6-31G\*,CH2Cl2) = -2821.06320 (a.u.)

### Int<sub>6</sub>

Standard orientation:

| Center Number | Atomic Number | Atomic Type | Coordinates (Angstroms) |           |           |
|---------------|---------------|-------------|-------------------------|-----------|-----------|
|               |               |             | X                       | Y         | Z         |
| 1             | 8             | 0           | -2.272166               | -0.785391 | -0.482539 |
| 2             | 6             | 0           | -3.422216               | -0.387768 | -0.280545 |
| 3             | 1             | 0           | -3.668134               | 0.101960  | 0.673915  |
| 4             | 6             | 0           | -4.511279               | -0.537665 | -1.244970 |
| 5             | 6             | 0           | -4.285865               | -1.122827 | -2.504502 |
| 6             | 6             | 0           | -5.798672               | -0.100065 | -0.890730 |
| 7             | 6             | 0           | -5.340625               | -1.267392 | -3.396549 |
| 8             | 1             | 0           | -3.283075               | -1.449420 | -2.760945 |
| 9             | 6             | 0           | -6.852749               | -0.251037 | -1.789328 |
| 10            | 1             | 0           | -5.963422               | 0.364025  | 0.077852  |
| 11            | 6             | 0           | -6.623622               | -0.833173 | -3.038015 |
| 12            | 1             | 0           | -5.171952               | -1.716011 | -4.371335 |
| 13            | 1             | 0           | -7.848633               | 0.086696  | -1.518438 |
| 14            | 1             | 0           | -7.446340               | -0.948524 | -3.738732 |
| 15            | 1             | 0           | -4.017390               | 3.041491  | 0.585209  |
| 16            | 7             | 0           | -4.745329               | 2.697980  | 1.268725  |
| 17            | 6             | 0           | -5.493436               | 2.199473  | 2.024785  |
| 18            | 6             | 0           | 1.846774                | 3.552679  | -0.586225 |
| 19            | 6             | 0           | 3.189888                | 3.210095  | -0.304424 |
| 20            | 6             | 0           | 3.513187                | 1.843359  | -0.012355 |
| 21            | 6             | 0           | 2.493182                | 0.831890  | -0.091813 |
| 22            | 6             | 0           | 1.171616                | 1.214128  | -0.338658 |
| 23            | 6             | 0           | 0.864882                | 2.593169  | -0.577842 |
| 24            | 6             | 0           | 2.823504                | -0.604530 | 0.144623  |
| 25            | 6             | 0           | 3.790799                | -1.306841 | -0.655911 |
| 26            | 6             | 0           | 4.181862                | -2.639504 | -0.292840 |
| 27            | 6             | 0           | 3.579936                | -3.251102 | 0.840047  |
| 28            | 6             | 0           | 2.189769                | -1.292988 | 1.180884  |
| 29            | 6             | 0           | 2.598115                | -2.605600 | 1.545937  |
| 30            | 1             | 0           | 1.582266                | 4.592235  | -0.760096 |
| 31            | 6             | 0           | 4.202156                | 4.205635  | -0.251438 |
| 32            | 6             | 0           | 4.852657                | 1.557892  | 0.380250  |
| 33            | 7             | 0           | -0.493880               | 2.980749  | -0.793283 |
| 34            | 6             | 0           | 4.365716                | -0.747629 | -1.832482 |
| 35            | 6             | 0           | 5.145139                | -3.325833 | -1.078024 |
| 36            | 1             | 0           | 3.894754                | -4.252246 | 1.125814  |



|    |    |   |           |           |           |
|----|----|---|-----------|-----------|-----------|
| 37 | 1  | 0 | 2.103639  | -3.071867 | 2.392504  |
| 38 | 8  | 0 | 1.160145  | -0.729296 | 1.865449  |
| 39 | 8  | 0 | 0.159923  | 0.331850  | -0.387886 |
| 40 | 22 | 0 | -0.485022 | -0.809036 | 0.966845  |
| 41 | 8  | 0 | -0.650262 | -2.574731 | 0.800033  |
| 42 | 8  | 0 | -1.523415 | -0.003348 | 2.184490  |
| 43 | 6  | 0 | -0.612016 | -3.820776 | 0.122154  |
| 44 | 6  | 0 | -2.167022 | -0.010114 | 3.459407  |
| 45 | 6  | 0 | -0.176376 | -3.625742 | -1.330480 |
| 46 | 6  | 0 | -1.239880 | 0.642188  | 4.484448  |
| 47 | 6  | 0 | -1.975677 | -4.501724 | 0.246754  |
| 48 | 1  | 0 | 0.141515  | -4.434215 | 0.637481  |
| 49 | 6  | 0 | -2.572096 | -1.431224 | 3.848432  |
| 50 | 1  | 0 | -3.072845 | 0.603072  | 3.351265  |
| 51 | 6  | 0 | -1.537470 | 2.748823  | 0.048190  |
| 52 | 7  | 0 | -2.654211 | 3.292796  | -0.401724 |
| 53 | 6  | 0 | -2.323554 | 3.907119  | -1.591572 |
| 54 | 6  | 0 | -0.990834 | 3.728048  | -1.849356 |
| 55 | 1  | 0 | -1.436693 | 2.182706  | 0.962681  |
| 56 | 1  | 0 | -3.060762 | 4.431676  | -2.182425 |
| 57 | 1  | 0 | -0.358076 | 4.030792  | -2.669044 |
| 58 | 6  | 0 | 5.490530  | 3.884965  | 0.105574  |
| 59 | 6  | 0 | 5.809152  | 2.546965  | 0.437306  |
| 60 | 6  | 0 | 5.693352  | -2.745752 | -2.199272 |
| 61 | 6  | 0 | 5.286265  | -1.446779 | -2.582301 |
| 62 | 1  | 0 | 3.931537  | 5.232749  | -0.485659 |
| 63 | 1  | 0 | 6.257002  | 4.653734  | 0.148846  |
| 64 | 1  | 0 | 6.820223  | 2.296402  | 0.747162  |
| 65 | 1  | 0 | 5.116634  | 0.542586  | 0.649433  |
| 66 | 1  | 0 | 4.059692  | 0.244174  | -2.145871 |
| 67 | 1  | 0 | 5.701216  | -0.995471 | -3.479833 |
| 68 | 1  | 0 | 6.426014  | -3.283793 | -2.794577 |
| 69 | 1  | 0 | 5.434794  | -4.330883 | -0.778907 |
| 70 | 1  | 0 | 0.805512  | -3.144249 | -1.375657 |
| 71 | 1  | 0 | -0.897716 | -2.995788 | -1.862636 |
| 72 | 1  | 0 | -0.110201 | -4.591870 | -1.844007 |
| 73 | 1  | 0 | -0.971851 | 1.655899  | 4.170176  |
| 74 | 1  | 0 | -0.317849 | 0.060239  | 4.589250  |
| 75 | 1  | 0 | -1.732760 | 0.702356  | 5.461628  |
| 76 | 1  | 0 | -2.745695 | -3.910854 | -0.261678 |
| 77 | 1  | 0 | -2.258035 | -4.607518 | 1.299216  |
| 78 | 1  | 0 | -1.948928 | -5.499682 | -0.206137 |
| 79 | 1  | 0 | -1.686427 | -2.066938 | 3.962956  |
| 80 | 1  | 0 | -3.219029 | -1.875311 | 3.084583  |
| 81 | 1  | 0 | -3.118928 | -1.424872 | 4.798074  |

E<sub>ZPE</sub>: B3LYP/6-31G\* = -2820.39589 (a.u.)

Gsol: B3LYP/6-311++G\*\*/(SMD,M06-2X/6-31G\*,CH2Cl2) = -2821.06846 (a.u.)

### TS<sub>3</sub>

Standard orientation:

| Center Number | Atomic Number | Atomic Type | Coordinates (Angstroms) |           |           |
|---------------|---------------|-------------|-------------------------|-----------|-----------|
|               |               |             | X                       | Y         | Z         |
| 1             | 6             | 0           | 2.772300                | 3.253793  | -0.318860 |
| 2             | 6             | 0           | 3.914737                | 2.553779  | 0.126412  |
| 3             | 6             | 0           | 3.823309                | 1.138322  | 0.335368  |
| 4             | 6             | 0           | 2.606213                | 0.443489  | 0.015599  |
| 5             | 6             | 0           | 1.473396                | 1.173765  | -0.362585 |
| 6             | 6             | 0           | 1.580199                | 2.596949  | -0.512246 |
| 7             | 6             | 0           | 2.528370                | -1.040023 | 0.154562  |
| 8             | 6             | 0           | 1.592344                | -1.596067 | 1.026384  |
| 9             | 6             | 0           | 1.613232                | -2.983761 | 1.334627  |
| 10            | 6             | 0           | 2.512899                | -3.817968 | 0.723523  |
| 11            | 6             | 0           | 3.411212                | -1.920432 | -0.562837 |
| 12            | 6             | 0           | 3.410523                | -3.323857 | -0.261770 |
| 13            | 1             | 0           | 2.845943                | 4.322770  | -0.495924 |
| 14            | 6             | 0           | 5.131380                | 3.236933  | 0.397096  |
| 15            | 6             | 0           | 4.966182                | 0.484044  | 0.880303  |

|    |    |   |           |           |           |
|----|----|---|-----------|-----------|-----------|
| 16 | 8  | 0 | 0.635737  | -0.825032 | 1.600888  |
| 17 | 1  | 0 | 0.892769  | -3.352060 | 2.057785  |
| 18 | 1  | 0 | 2.533087  | -4.877802 | 0.967679  |
| 19 | 6  | 0 | 4.289573  | -4.190866 | -0.962068 |
| 20 | 7  | 0 | 0.416657  | 3.373888  | -0.829751 |
| 21 | 7  | 0 | -1.504903 | 4.014551  | -1.642028 |
| 22 | 6  | 0 | -1.010873 | 5.067594  | -0.909433 |
| 23 | 6  | 0 | 0.190861  | 4.679078  | -0.396852 |
| 24 | 6  | 0 | -0.645094 | 3.005287  | -1.578460 |
| 25 | 1  | 0 | -1.552922 | 5.993548  | -0.799463 |
| 26 | 1  | 0 | 0.884133  | 5.186487  | 0.252450  |
| 27 | 1  | 0 | -0.789703 | 2.030914  | -2.012379 |
| 28 | 6  | 0 | 4.278058  | -1.467079 | -1.597280 |
| 29 | 8  | 0 | 0.293658  | 0.599083  | -0.628893 |
| 30 | 22 | 0 | -0.851276 | -0.429965 | 0.518022  |
| 31 | 8  | 0 | -1.693046 | 0.430260  | 1.851101  |
| 32 | 8  | 0 | -1.350695 | -2.115067 | 0.188898  |
| 33 | 6  | 0 | -1.462911 | 0.753033  | 3.222066  |
| 34 | 6  | 0 | -1.970869 | -3.155361 | -0.541560 |
| 35 | 6  | 0 | -2.438103 | -0.031904 | 4.098605  |
| 36 | 6  | 0 | -1.593710 | 2.265154  | 3.401721  |
| 37 | 1  | 0 | -0.435789 | 0.445037  | 3.461677  |
| 38 | 6  | 0 | -2.494731 | -4.207799 | 0.436734  |
| 39 | 6  | 0 | -0.988132 | -3.729384 | -1.563248 |
| 40 | 1  | 0 | -2.829381 | -2.721488 | -1.077986 |
| 41 | 1  | 0 | -2.499486 | 3.862326  | -2.106209 |
| 42 | 6  | 0 | 6.220615  | 2.564416  | 0.896758  |
| 43 | 6  | 0 | 6.124705  | 1.175703  | 1.153665  |
| 44 | 6  | 0 | 5.106960  | -2.337888 | -2.270528 |
| 45 | 6  | 0 | 5.125711  | -3.714025 | -1.945969 |
| 46 | 1  | 0 | 5.177322  | 4.308255  | 0.214561  |
| 47 | 1  | 0 | 7.145041  | 3.094379  | 1.108267  |
| 48 | 1  | 0 | 6.975604  | 0.648113  | 1.576115  |
| 49 | 1  | 0 | 4.913564  | -0.576570 | 1.091910  |
| 50 | 1  | 0 | 4.271041  | -0.416666 | -1.866777 |
| 51 | 1  | 0 | 5.749959  | -1.962812 | -3.062540 |
| 52 | 1  | 0 | 5.788847  | -4.389561 | -2.479345 |
| 53 | 1  | 0 | 4.279597  | -5.249490 | -0.711691 |
| 54 | 1  | 0 | -2.245496 | 0.166584  | 5.159487  |
| 55 | 1  | 0 | -3.473546 | 0.253706  | 3.878513  |
| 56 | 1  | 0 | -2.329890 | -1.107401 | 3.924629  |
| 57 | 1  | 0 | -1.392697 | 2.547377  | 4.441908  |
| 58 | 1  | 0 | -0.880530 | 2.790911  | 2.758167  |
| 59 | 1  | 0 | -2.604631 | 2.598266  | 3.140532  |
| 60 | 1  | 0 | -3.022974 | -5.003977 | -0.100464 |
| 61 | 1  | 0 | -1.664954 | -4.655962 | 0.994512  |
| 62 | 1  | 0 | -3.188065 | -3.752352 | 1.150933  |
| 63 | 1  | 0 | -1.465922 | -4.519932 | -2.153773 |
| 64 | 1  | 0 | -0.643725 | -2.946961 | -2.247734 |
| 65 | 1  | 0 | -0.113000 | -4.148612 | -1.056309 |
| 66 | 6  | 0 | -4.076091 | 2.069537  | -2.545695 |
| 67 | 7  | 0 | -3.750885 | 3.197962  | -2.624991 |
| 68 | 8  | 0 | -2.348899 | 0.092166  | -0.950074 |
| 69 | 6  | 0 | -3.425185 | -0.141978 | -1.535230 |
| 70 | 1  | 0 | -3.405763 | -0.348830 | -2.609166 |
| 71 | 6  | 0 | -4.697041 | -0.416137 | -0.845091 |
| 72 | 6  | 0 | -4.806084 | -0.312297 | 0.549991  |
| 73 | 6  | 0 | -5.797150 | -0.845861 | -1.602877 |
| 74 | 6  | 0 | -6.006527 | -0.643434 | 1.174349  |
| 75 | 1  | 0 | -3.952652 | 0.028941  | 1.126593  |
| 76 | 6  | 0 | -6.992339 | -1.179650 | -0.974297 |
| 77 | 1  | 0 | -5.711495 | -0.894155 | -2.685367 |
| 78 | 6  | 0 | -7.097438 | -1.078713 | 0.416601  |
| 79 | 1  | 0 | -6.094260 | -0.562419 | 2.254504  |
| 80 | 1  | 0 | -7.843256 | -1.510149 | -1.563253 |
| 81 | 1  | 0 | -8.031816 | -1.335630 | 0.908838  |

-----  
E<sub>ZPE</sub>: B3LYP/6-31G\* = -2820.37602 (a.u.)  
Gsol: B3LYP/6-311++G\*\*/(SMD,M06-2X/6-31G\*,CH2Cl2) = -2821.06103 (a.u.)

TS<sub>4</sub>

Standard orientation:

| Center<br>Number | Atomic<br>Number | Atomic<br>Type | Coordinates (Angstroms) |           |           |
|------------------|------------------|----------------|-------------------------|-----------|-----------|
|                  |                  |                | X                       | Y         | Z         |
| 1                | 6                | 0              | 2.626572                | 3.167058  | -1.097187 |
| 2                | 6                | 0              | 3.855912                | 2.526845  | -0.824973 |
| 3                | 6                | 0              | 3.845017                | 1.193543  | -0.296186 |
| 4                | 6                | 0              | 2.600225                | 0.487898  | -0.164460 |
| 5                | 6                | 0              | 1.398047                | 1.155447  | -0.425255 |
| 6                | 6                | 0              | 1.435689                | 2.527039  | -0.848621 |
| 7                | 6                | 0              | 2.567306                | -0.921979 | 0.321114  |
| 8                | 6                | 0              | 1.830793                | -1.231074 | 1.468660  |
| 9                | 6                | 0              | 1.944830                | -2.511787 | 2.080159  |
| 10               | 6                | 0              | 2.708667                | -3.495473 | 1.507758  |
| 11               | 6                | 0              | 3.289047                | -1.976511 | -0.339846 |
| 12               | 6                | 0              | 3.370388                | -3.273617 | 0.269549  |
| 13               | 1                | 0              | 2.638637                | 4.183126  | -1.480726 |
| 14               | 6                | 0              | 5.089460                | 3.207002  | -1.015374 |
| 15               | 6                | 0              | 5.097806                | 0.636366  | 0.092664  |
| 16               | 8                | 0              | 0.993202                | -0.327906 | 2.029841  |
| 17               | 1                | 0              | 1.403799                | -2.675522 | 3.006959  |
| 18               | 1                | 0              | 2.796226                | -4.469972 | 1.983028  |
| 19               | 6                | 0              | 4.090778                | -4.310035 | -0.379994 |
| 20               | 7                | 0              | 0.217100                | 3.283938  | -0.927668 |
| 21               | 7                | 0              | -1.889893               | 3.843268  | -1.038945 |
| 22               | 6                | 0              | -1.191289               | 4.986410  | -0.727255 |
| 23               | 6                | 0              | 0.126275                | 4.649538  | -0.658899 |
| 24               | 6                | 0              | -1.035685               | 2.829542  | -1.148841 |
| 25               | 1                | 0              | -1.682640               | 5.932766  | -0.565700 |
| 26               | 1                | 0              | 0.993642                | 5.234569  | -0.405768 |
| 27               | 1                | 0              | -1.302316               | 1.801966  | -1.330598 |
| 28               | 6                | 0              | 3.908508                | -1.805149 | -1.610577 |
| 29               | 8                | 0              | 0.208341                | 0.561495  | -0.333217 |
| 30               | 22               | 0              | -0.697023               | -0.185868 | 1.195933  |
| 31               | 8                | 0              | -1.495357               | 1.023013  | 2.205815  |
| 32               | 8                | 0              | -1.276474               | -1.853897 | 1.450751  |
| 33               | 6                | 0              | -2.576409               | 1.497311  | 3.007893  |
| 34               | 6                | 0              | -1.445419               | -3.248910 | 1.264446  |
| 35               | 6                | 0              | -2.994225               | 0.418964  | 4.006555  |
| 36               | 1                | 0              | -3.406134               | 1.711581  | 2.321663  |
| 37               | 6                | 0              | -2.137564               | 2.794003  | 3.685822  |
| 38               | 6                | 0              | -2.865934               | -3.646167 | 1.670207  |
| 39               | 1                | 0              | -0.733388               | -3.748619 | 1.937086  |
| 40               | 6                | 0              | -1.111605               | -3.640511 | -0.176177 |
| 41               | 1                | 0              | -2.959059               | 3.660682  | -0.962649 |
| 42               | 6                | 0              | 6.280195                | 2.620886  | -0.658987 |
| 43               | 6                | 0              | 6.275149                | 1.328267  | -0.082209 |
| 44               | 6                | 0              | 4.585375                | -2.837080 | -2.223419 |
| 45               | 6                | 0              | 4.691613                | -4.102270 | -1.600843 |
| 46               | 1                | 0              | 5.069628                | 4.211275  | -1.432998 |
| 47               | 1                | 0              | 7.218261                | 3.150262  | -0.800388 |
| 48               | 1                | 0              | 7.212528                | 0.876755  | 0.231404  |
| 49               | 1                | 0              | 5.118075                | -0.347926 | 0.543531  |
| 50               | 1                | 0              | 3.830247                | -0.844950 | -2.108411 |
| 51               | 1                | 0              | 5.038928                | -2.677170 | -3.198213 |
| 52               | 1                | 0              | 5.234645                | -4.905835 | -2.090772 |
| 53               | 1                | 0              | 4.147934                | -5.282173 | 0.104992  |
| 54               | 1                | 0              | -2.171625               | 0.195117  | 4.695725  |
| 55               | 1                | 0              | -3.266505               | -0.505807 | 3.486937  |
| 56               | 1                | 0              | -3.858266               | 0.753060  | 4.592157  |
| 57               | 1                | 0              | -1.844842               | 3.536408  | 2.936683  |
| 58               | 1                | 0              | -1.283182               | 2.611228  | 4.347182  |
| 59               | 1                | 0              | -2.958952               | 3.209952  | 4.280512  |
| 60               | 1                | 0              | -3.602985               | -3.190428 | 0.999250  |
| 61               | 1                | 0              | -3.078421               | -3.321405 | 2.694037  |
| 62               | 1                | 0              | -2.987099               | -4.734524 | 1.620867  |
| 63               | 1                | 0              | -0.086489               | -3.348842 | -0.424931 |
| 64               | 1                | 0              | -1.795453               | -3.151664 | -0.878706 |

|    |   |   |           |           |           |
|----|---|---|-----------|-----------|-----------|
| 65 | 1 | 0 | -1.200568 | -4.725385 | -0.306345 |
| 66 | 8 | 0 | -2.290865 | -0.098769 | -0.368554 |
| 67 | 6 | 0 | -3.509369 | -0.341359 | -0.244967 |
| 68 | 1 | 0 | -3.952203 | -0.444129 | 0.749920  |
| 69 | 6 | 0 | -4.322079 | -0.832909 | -1.375426 |
| 70 | 6 | 0 | -3.740079 | -1.037841 | -2.634357 |
| 71 | 6 | 0 | -5.666570 | -1.171960 | -1.165950 |
| 72 | 6 | 0 | -4.498561 | -1.573861 | -3.672437 |
| 73 | 1 | 0 | -2.695438 | -0.781327 | -2.779091 |
| 74 | 6 | 0 | -6.421744 | -1.709611 | -2.203708 |
| 75 | 1 | 0 | -6.116648 | -0.985967 | -0.194329 |
| 76 | 6 | 0 | -5.838147 | -1.910110 | -3.458684 |
| 77 | 1 | 0 | -4.046708 | -1.733331 | -4.647622 |
| 78 | 1 | 0 | -7.464408 | -1.967068 | -2.040202 |
| 79 | 1 | 0 | -6.428277 | -2.328562 | -4.269730 |
| 80 | 7 | 0 | -4.324460 | 2.976413  | -0.578481 |
| 81 | 6 | 0 | -4.525714 | 1.891119  | -0.171315 |

-----  
E<sub>ZPE</sub>: B3LYP/6-31G\* = -2820.37774 (a.u.)  
Gsol: B3LYP/6-311++G\*\*/(SMD,M06-2X/6-31G\*,CH2Cl2) = -2821.07185 (a.u.)

TS<sub>5</sub>

Standard orientation:

| Center<br>Number | Atomic<br>Number | Atomic<br>Type | Coordinates (Angstroms) |           |           |
|------------------|------------------|----------------|-------------------------|-----------|-----------|
|                  |                  |                | X                       | Y         | Z         |
| 1                | 6                | 0              | -4.225901               | 2.920298  | -0.990740 |
| 2                | 7                | 0              | -3.832567               | 4.028160  | -1.046048 |
| 3                | 1                | 0              | -2.332707               | 4.421582  | -1.223388 |
| 4                | 6                | 0              | 2.241771                | -3.978967 | 0.276003  |
| 5                | 6                | 0              | 3.204883                | -3.431018 | -0.613581 |
| 6                | 6                | 0              | 1.373096                | -3.166390 | 0.958125  |
| 7                | 6                | 0              | 1.443068                | -1.752458 | 0.816473  |
| 8                | 6                | 0              | 2.437523                | -1.161480 | 0.038045  |
| 9                | 6                | 0              | 3.298431                | -2.004682 | -0.746382 |
| 10               | 6                | 0              | 2.588481                | 0.322297  | 0.053127  |
| 11               | 6                | 0              | 3.818353                | 0.923438  | 0.491082  |
| 12               | 6                | 0              | 1.514189                | 1.139890  | -0.319299 |
| 13               | 6                | 0              | 1.726401                | 2.556189  | -0.403308 |
| 14               | 6                | 0              | 2.920741                | 3.137862  | -0.051685 |
| 15               | 6                | 0              | 3.989736                | 2.345679  | 0.421551  |
| 16               | 1                | 0              | 2.190243                | -5.059197 | 0.392979  |
| 17               | 6                | 0              | 4.062107                | -4.263983 | -1.379434 |
| 18               | 1                | 0              | 0.614633                | -3.572351 | 1.620330  |
| 19               | 6                | 0              | 4.235572                | -1.489445 | -1.686322 |
| 20               | 6                | 0              | 4.891389                | 0.162411  | 1.039855  |
| 21               | 8                | 0              | 0.304290                | 0.666575  | -0.634449 |
| 22               | 1                | 0              | 3.036444                | 4.217237  | -0.100211 |
| 23               | 6                | 0              | 5.209113                | 2.938041  | 0.847954  |
| 24               | 7                | 0              | 0.686663                | 3.402275  | -0.916577 |
| 25               | 22               | 0              | -0.921388               | -0.355465 | 0.431337  |
| 26               | 7                | 0              | -1.245967               | 4.342441  | -1.267448 |
| 27               | 6                | 0              | -0.331027               | 5.014826  | -2.043788 |
| 28               | 6                | 0              | 0.883705                | 4.433479  | -1.829758 |
| 29               | 6                | 0              | -0.623343               | 3.373921  | -0.605456 |
| 30               | 1                | 0              | -0.615742               | 5.832836  | -2.686261 |
| 31               | 1                | 0              | 1.856086                | 4.628947  | -2.250789 |
| 32               | 1                | 0              | -1.102138               | 2.679514  | 0.062988  |
| 33               | 8                | 0              | -1.656962               | 0.481196  | 1.834965  |
| 34               | 8                | 0              | -1.532204               | -1.928092 | -0.117775 |
| 35               | 6                | 0              | -1.751051               | 0.634595  | 3.248290  |
| 36               | 6                | 0              | -1.812593               | -3.207344 | -0.657562 |
| 37               | 6                | 0              | -1.877750               | -0.734118 | 3.919436  |
| 38               | 6                | 0              | -0.548975               | 1.431196  | 3.756239  |
| 39               | 1                | 0              | -2.668858               | 1.211423  | 3.433601  |
| 40               | 6                | 0              | -2.741502               | -3.966924 | 0.290059  |
| 41               | 6                | 0              | -2.395921               | -3.056445 | -2.063557 |
| 42               | 1                | 0              | -0.854513               | -3.741397 | -0.725478 |
| 43               | 8                | 0              | 0.532664                | -0.989616 | 1.465193  |

|    |   |   |           |           |           |
|----|---|---|-----------|-----------|-----------|
| 44 | 8 | 0 | -2.395575 | 0.582161  | -0.864562 |
| 45 | 6 | 0 | -3.552109 | 0.625408  | -1.329297 |
| 46 | 6 | 0 | -4.729801 | -0.042625 | -0.735613 |
| 47 | 6 | 0 | -4.747952 | -0.466876 | 0.600453  |
| 48 | 6 | 0 | -5.864684 | -1.130479 | 1.102573  |
| 49 | 6 | 0 | -6.963926 | -1.384945 | 0.275909  |
| 50 | 6 | 0 | -6.949544 | -0.964746 | -1.056128 |
| 51 | 6 | 0 | -5.838470 | -0.290062 | -1.557223 |
| 52 | 1 | 0 | -3.676641 | 0.951453  | -2.367833 |
| 53 | 1 | 0 | -3.895157 | -0.250969 | 1.233698  |
| 54 | 1 | 0 | -5.883376 | -1.447480 | 2.141972  |
| 55 | 1 | 0 | -7.832449 | -1.904564 | 0.671971  |
| 56 | 1 | 0 | -7.804571 | -1.155987 | -1.698557 |
| 57 | 1 | 0 | -5.828366 | 0.057634  | -2.587564 |
| 58 | 6 | 0 | 4.967802  | -3.729195 | -2.267131 |
| 59 | 6 | 0 | 5.043001  | -2.326014 | -2.425687 |
| 60 | 6 | 0 | 6.056447  | 0.765366  | 1.457274  |
| 61 | 6 | 0 | 6.228636  | 2.166522  | 1.351892  |
| 62 | 1 | 0 | 5.314492  | 4.018338  | 0.777299  |
| 63 | 1 | 0 | 7.156306  | 2.626805  | 1.680122  |
| 64 | 1 | 0 | 6.852432  | 0.157289  | 1.878628  |
| 65 | 1 | 0 | 4.776658  | -0.909900 | 1.139809  |
| 66 | 1 | 0 | 4.301133  | -0.416462 | -1.828603 |
| 67 | 1 | 0 | 5.742525  | -1.902115 | -3.141563 |
| 68 | 1 | 0 | 5.614573  | -4.378120 | -2.851234 |
| 69 | 1 | 0 | 3.980483  | -5.341858 | -1.256680 |
| 70 | 1 | 0 | -0.981781 | -1.331943 | 3.725547  |
| 71 | 1 | 0 | -2.748287 | -1.274905 | 3.532210  |
| 72 | 1 | 0 | -1.999346 | -0.619888 | 5.002812  |
| 73 | 1 | 0 | -0.496768 | 2.405021  | 3.257308  |
| 74 | 1 | 0 | 0.377923  | 0.884858  | 3.555671  |
| 75 | 1 | 0 | -0.631149 | 1.605176  | 4.835580  |
| 76 | 1 | 0 | -3.697082 | -3.441351 | 0.391366  |
| 77 | 1 | 0 | -2.288069 | -4.055001 | 1.283029  |
| 78 | 1 | 0 | -2.936239 | -4.976254 | -0.091149 |
| 79 | 1 | 0 | -1.714910 | -2.483507 | -2.701231 |
| 80 | 1 | 0 | -3.361124 | -2.539699 | -2.028026 |
| 81 | 1 | 0 | -2.548097 | -4.042182 | -2.518549 |

E<sub>ZPE</sub>: B3LYP/6-31G\* = -2820.37292 (a.u.)  
 Gsol: B3LYP/6-311++G\*\*/(SMD,M06-2X/6-31G\*,CH2Cl2) = -2821.05565 (a.u.)

### TS<sub>6</sub>

Standard orientation:

| Center Number | Atomic Number | Atomic Type | Coordinates (Angstroms) |           |           |
|---------------|---------------|-------------|-------------------------|-----------|-----------|
|               |               |             | X                       | Y         | Z         |
| 1             | 8             | 0           | -2.345782               | -0.098395 | -0.290050 |
| 2             | 6             | 0           | -3.558635               | -0.279599 | -0.028690 |
| 3             | 1             | 0           | -3.863415               | -0.578692 | 0.978457  |
| 4             | 6             | 0           | -4.538040               | -0.553072 | -1.107395 |
| 5             | 6             | 0           | -5.841704               | -0.947663 | -0.778012 |
| 6             | 6             | 0           | -4.148586               | -0.493389 | -2.451974 |
| 7             | 6             | 0           | -6.747629               | -1.280281 | -1.781588 |
| 8             | 1             | 0           | -6.143575               | -0.973366 | 0.266208  |
| 9             | 6             | 0           | -5.057578               | -0.823002 | -3.455126 |
| 10            | 1             | 0           | -3.133112               | -0.193667 | -2.690624 |
| 11            | 6             | 0           | -6.356393               | -1.217201 | -3.122269 |
| 12            | 1             | 0           | -7.757985               | -1.584239 | -1.522237 |
| 13            | 1             | 0           | -4.754085               | -0.776761 | -4.497612 |
| 14            | 1             | 0           | -7.063456               | -1.475572 | -3.906204 |
| 15            | 6             | 0           | -4.357668               | 1.840944  | 0.508846  |
| 16            | 7             | 0           | -4.274600               | 2.994137  | 0.293515  |
| 17            | 1             | 0           | -3.012754               | 3.689936  | -0.494671 |
| 18            | 6             | 0           | 2.476105                | 3.310298  | -0.674268 |
| 19            | 6             | 0           | 3.729029                | 2.734339  | -0.365899 |
| 20            | 6             | 0           | 3.791452                | 1.335395  | -0.051330 |
| 21            | 6             | 0           | 2.603495                | 0.528306  | -0.108273 |
| 22            | 6             | 0           | 1.368080                | 1.137792  | -0.356509 |

|    |    |   |           |           |           |
|----|----|---|-----------|-----------|-----------|
| 23 | 6  | 0 | 1.339012  | 2.540767  | -0.653871 |
| 24 | 6  | 0 | 2.657848  | -0.937103 | 0.161572  |
| 25 | 6  | 0 | 1.904946  | -1.455344 | 1.217763  |
| 26 | 6  | 0 | 2.051754  | -2.814440 | 1.615732  |
| 27 | 6  | 0 | 2.879899  | -3.658938 | 0.922447  |
| 28 | 6  | 0 | 3.463455  | -1.833052 | -0.622175 |
| 29 | 6  | 0 | 3.583611  | -3.207975 | -0.226880 |
| 30 | 1  | 0 | 2.412299  | 4.375024  | -0.883205 |
| 31 | 6  | 0 | 4.907654  | 3.527154  | -0.322942 |
| 32 | 6  | 0 | 5.055956  | 0.812849  | 0.348043  |
| 33 | 8  | 0 | 1.027910  | -0.677205 | 1.888341  |
| 34 | 1  | 0 | 1.487605  | -3.150991 | 2.480050  |
| 35 | 1  | 0 | 2.993091  | -4.695090 | 1.233570  |
| 36 | 6  | 0 | 4.386988  | -4.090627 | -0.995295 |
| 37 | 7  | 0 | 0.081113  | 3.160991  | -0.961131 |
| 38 | 7  | 0 | -2.007004 | 3.756494  | -0.852625 |
| 39 | 6  | 0 | -1.474713 | 4.383716  | -1.956607 |
| 40 | 6  | 0 | -0.163018 | 4.016228  | -2.030093 |
| 41 | 6  | 0 | -1.064801 | 3.021004  | -0.272258 |
| 42 | 1  | 0 | -2.064256 | 5.021412  | -2.595693 |
| 43 | 1  | 0 | 0.609487  | 4.256301  | -2.742217 |
| 44 | 1  | 0 | -1.210379 | 2.417036  | 0.609823  |
| 45 | 6  | 0 | 4.135558  | -1.426809 | -1.809931 |
| 46 | 8  | 0 | 0.208966  | 0.475141  | -0.363248 |
| 47 | 22 | 0 | -0.669812 | -0.419834 | 1.092206  |
| 48 | 8  | 0 | -1.362690 | 0.727696  | 2.264839  |
| 49 | 8  | 0 | -1.253639 | -2.106850 | 1.188738  |
| 50 | 6  | 0 | -2.263915 | 1.000148  | 3.341882  |
| 51 | 6  | 0 | -1.411601 | -3.434356 | 0.712180  |
| 52 | 6  | 0 | -2.411723 | -0.234622 | 4.229721  |
| 53 | 1  | 0 | -3.229622 | 1.248038  | 2.883697  |
| 54 | 6  | 0 | -1.744605 | 2.216352  | 4.106511  |
| 55 | 6  | 0 | -1.185425 | -3.490963 | -0.799724 |
| 56 | 6  | 0 | -2.789154 | -3.955707 | 1.124772  |
| 57 | 1  | 0 | -0.640127 | -4.043009 | 1.205995  |
| 58 | 6  | 0 | 6.178257  | 1.608739  | 0.393460  |
| 59 | 6  | 0 | 6.113435  | 2.978634  | 0.043012  |
| 60 | 6  | 0 | 5.036342  | -3.657769 | -2.129085 |
| 61 | 6  | 0 | 4.896335  | -2.312392 | -2.541734 |
| 62 | 1  | 0 | 7.009131  | 3.592362  | 0.078489  |
| 63 | 1  | 0 | 4.832603  | 4.582909  | -0.573869 |
| 64 | 1  | 0 | 7.125557  | 1.180139  | 0.709478  |
| 65 | 1  | 0 | 5.126538  | -0.229695 | 0.632503  |
| 66 | 1  | 0 | 4.032273  | -0.401397 | -2.147237 |
| 67 | 1  | 0 | 5.390793  | -1.973583 | -3.448545 |
| 68 | 1  | 0 | 5.644390  | -4.344821 | -2.711222 |
| 69 | 1  | 0 | 4.471178  | -5.126173 | -0.672622 |
| 70 | 1  | 0 | -1.452793 | -0.490768 | 4.694888  |
| 71 | 1  | 0 | -2.750162 | -1.096157 | 3.644495  |
| 72 | 1  | 0 | -3.143993 | -0.047518 | 5.023522  |
| 73 | 1  | 0 | -1.659758 | 3.082446  | 3.442257  |
| 74 | 1  | 0 | -0.758378 | 2.007358  | 4.535931  |
| 75 | 1  | 0 | -2.432540 | 2.477299  | 4.918852  |
| 76 | 1  | 0 | -0.183222 | -3.128397 | -1.050978 |
| 77 | 1  | 0 | -1.920982 | -2.870276 | -1.322404 |
| 78 | 1  | 0 | -1.278016 | -4.521331 | -1.161959 |
| 79 | 1  | 0 | -3.583891 | -3.390768 | 0.624532  |
| 80 | 1  | 0 | -2.925275 | -3.864456 | 2.207442  |
| 81 | 1  | 0 | -2.896120 | -5.011794 | 0.851238  |

E<sub>ZPE</sub>: B3LYP/6-31G\* = -2820.37946 (a.u.)  
Gsol: B3LYP/6-311++G\*\*/(SMD,M06-2X/6-31G\*,CH2Cl2) = -2821.05984 (a.u.)

### Int<sub>0</sub>

Standard orientation:

| Center<br>Number | Atomic<br>Number | Atomic<br>Type | Coordinates (Angstroms) |          |           |
|------------------|------------------|----------------|-------------------------|----------|-----------|
|                  |                  |                | X                       | Y        | Z         |
| 1                | 6                | 0              | 2.331948                | 3.328621 | -0.032007 |

|    |    |   |           |           |           |
|----|----|---|-----------|-----------|-----------|
| 2  | 6  | 0 | 3.473928  | 2.740311  | 0.555639  |
| 3  | 6  | 0 | 3.569334  | 1.308678  | 0.611397  |
| 4  | 6  | 0 | 2.537748  | 0.493925  | 0.035464  |
| 5  | 6  | 0 | 1.368387  | 1.099696  | -0.438941 |
| 6  | 6  | 0 | 1.302719  | 2.534580  | -0.480939 |
| 7  | 6  | 0 | 2.669611  | -0.987691 | -0.049595 |
| 8  | 6  | 0 | 1.704305  | -1.804606 | 0.552430  |
| 9  | 6  | 0 | 1.902872  | -3.217055 | 0.600860  |
| 10 | 6  | 0 | 2.981086  | -3.803972 | -0.006631 |
| 11 | 6  | 0 | 3.761422  | -1.598332 | -0.760178 |
| 12 | 6  | 0 | 3.924520  | -3.024021 | -0.726801 |
| 13 | 1  | 0 | 2.285069  | 4.410150  | -0.124433 |
| 14 | 6  | 0 | 4.516281  | 3.542553  | 1.095469  |
| 15 | 6  | 0 | 4.704962  | 0.753005  | 1.269325  |
| 16 | 8  | 0 | 0.606442  | -1.299244 | 1.122667  |
| 17 | 1  | 0 | 1.169127  | -3.809032 | 1.138485  |
| 18 | 1  | 0 | 3.118158  | -4.882217 | 0.040758  |
| 19 | 6  | 0 | 5.005745  | -3.626741 | -1.420455 |
| 20 | 7  | 0 | 0.122434  | 3.157737  | -1.018805 |
| 21 | 7  | 0 | -1.669196 | 3.514795  | -2.193247 |
| 22 | 6  | 0 | -1.492624 | 4.632541  | -1.403905 |
| 23 | 6  | 0 | -0.369080 | 4.413437  | -0.667525 |
| 24 | 6  | 0 | -0.701238 | 2.632178  | -1.939312 |
| 25 | 1  | 0 | -2.174168 | 5.467499  | -1.421699 |
| 26 | 1  | 0 | 0.107872  | 5.017309  | 0.085466  |
| 27 | 1  | 0 | -0.612960 | 1.641153  | -2.346349 |
| 28 | 6  | 0 | 4.690366  | -0.853077 | -1.542228 |
| 29 | 8  | 0 | 0.327462  | 0.405678  | -0.894596 |
| 30 | 22 | 0 | -0.959843 | -0.534725 | 0.271299  |
| 31 | 8  | 0 | -1.495641 | 0.081066  | 1.886519  |
| 32 | 8  | 0 | -1.629597 | -2.125361 | -0.290352 |
| 33 | 6  | 0 | -1.021566 | 0.044543  | 3.226848  |
| 34 | 6  | 0 | -1.814909 | -3.432295 | 0.234986  |
| 35 | 6  | 0 | -2.118354 | -0.520181 | 4.130604  |
| 36 | 6  | 0 | -0.589432 | 1.452229  | 3.640649  |
| 37 | 1  | 0 | -0.147659 | -0.620098 | 3.255493  |
| 38 | 6  | 0 | -3.254722 | -3.590120 | 0.728125  |
| 39 | 1  | 0 | -1.133396 | -3.559166 | 1.089505  |
| 40 | 6  | 0 | -1.447862 | -4.450395 | -0.845206 |
| 41 | 1  | 0 | -2.471122 | 3.270830  | -2.782392 |
| 42 | 6  | 0 | -3.591466 | 0.917273  | -2.590196 |
| 43 | 7  | 0 | -3.619199 | 1.744006  | -3.408441 |
| 44 | 8  | 0 | -2.340738 | 0.417473  | -0.719854 |
| 45 | 6  | 0 | -3.426324 | -0.031464 | -1.440933 |
| 46 | 1  | 0 | -3.239558 | -1.034617 | -1.863435 |
| 47 | 6  | 0 | -4.746404 | -0.084824 | -0.655377 |
| 48 | 6  | 0 | -5.913328 | -0.547973 | -1.274454 |
| 49 | 6  | 0 | -4.781865 | 0.309509  | 0.683076  |
| 50 | 6  | 0 | -7.109490 | -0.613884 | -0.561378 |
| 51 | 1  | 0 | -5.889118 | -0.857137 | -2.318053 |
| 52 | 6  | 0 | -5.981910 | 0.238557  | 1.396154  |
| 53 | 1  | 0 | -3.866699 | 0.643602  | 1.159800  |
| 54 | 6  | 0 | -7.146075 | -0.219288 | 0.778673  |
| 55 | 1  | 0 | -8.010731 | -0.975477 | -1.049631 |
| 56 | 1  | 0 | -6.003884 | 0.540976  | 2.440228  |
| 57 | 1  | 0 | -8.077112 | -0.272849 | 1.336951  |
| 58 | 6  | 0 | 5.687310  | 1.556281  | 1.802020  |
| 59 | 6  | 0 | 5.605082  | 2.966912  | 1.704827  |
| 60 | 6  | 0 | 5.722239  | -1.469461 | -2.216530 |
| 61 | 6  | 0 | 5.895272  | -2.870968 | -2.150161 |
| 62 | 1  | 0 | 4.427626  | 4.624776  | 1.028074  |
| 63 | 1  | 0 | 6.393507  | 3.587325  | 2.121697  |
| 64 | 1  | 0 | 6.536018  | 1.102227  | 2.306465  |
| 65 | 1  | 0 | 4.780607  | -0.324099 | 1.357179  |
| 66 | 1  | 0 | 4.571086  | 0.221760  | -1.619655 |
| 67 | 1  | 0 | 6.407573  | -0.870015 | -2.810682 |
| 68 | 1  | 0 | 6.716119  | -3.345083 | -2.681406 |
| 69 | 1  | 0 | 5.110861  | -4.708656 | -1.371878 |
| 70 | 1  | 0 | -1.767089 | -0.591212 | 5.167035  |
| 71 | 1  | 0 | -3.006245 | 0.122875  | 4.110168  |

|    |   |   |           |           |           |
|----|---|---|-----------|-----------|-----------|
| 72 | 1 | 0 | -2.412537 | -1.521087 | 3.797775  |
| 73 | 1 | 0 | -0.204415 | 1.455033  | 4.667407  |
| 74 | 1 | 0 | 0.202102  | 1.816368  | 2.976979  |
| 75 | 1 | 0 | -1.437209 | 2.145830  | 3.586117  |
| 76 | 1 | 0 | -3.403643 | -4.578670 | 1.179057  |
| 77 | 1 | 0 | -3.491017 | -2.826840 | 1.476731  |
| 78 | 1 | 0 | -3.961202 | -3.479363 | -0.102624 |
| 79 | 1 | 0 | -2.102402 | -4.331707 | -1.716648 |
| 80 | 1 | 0 | -0.412316 | -4.305738 | -1.167915 |
| 81 | 1 | 0 | -1.557321 | -5.474236 | -0.467514 |

-----  
 E<sub>ZPE</sub>: B3LYP/6-31G\* = -2820.40775 (a.u.)  
 Gsol: B3LYP/6-311++G\*\*/(SMD,M06-2X/6-31G\*,CH2Cl2) = -2821.08643 (a.u.)

int<sub>0</sub>

Standard orientation:

| Center<br>Number | Atomic<br>Number | Atomic<br>Type | Coordinates (Angstroms) |           |           |
|------------------|------------------|----------------|-------------------------|-----------|-----------|
|                  |                  |                | X                       | Y         | Z         |
| 1                | 6                | 0              | -2.970559               | -2.715869 | -1.093472 |
| 2                | 6                | 0              | -4.049752               | -2.016090 | -0.509619 |
| 3                | 6                | 0              | -3.832207               | -0.688341 | -0.005971 |
| 4                | 6                | 0              | -2.555025               | -0.065103 | -0.172601 |
| 5                | 6                | 0              | -1.481087               | -0.800576 | -0.694821 |
| 6                | 6                | 0              | -1.717162               | -2.149148 | -1.138141 |
| 7                | 6                | 0              | -2.303260               | 1.356288  | 0.201595  |
| 8                | 6                | 0              | -1.270692               | 1.671036  | 1.091402  |
| 9                | 6                | 0              | -1.071373               | 3.016814  | 1.514275  |
| 10               | 6                | 0              | -1.842202               | 4.036092  | 1.021067  |
| 11               | 6                | 0              | -3.061177               | 2.429838  | -0.385886 |
| 12               | 6                | 0              | -2.840889               | 3.781467  | 0.045161  |
| 13               | 1                | 0              | -3.153679               | -3.710636 | -1.489568 |
| 14               | 6                | 0              | -5.332469               | -2.618064 | -0.387571 |
| 15               | 6                | 0              | -4.921546               | -0.052679 | 0.659375  |
| 16               | 8                | 0              | -0.449810               | 0.736026  | 1.605945  |
| 17               | 1                | 0              | -0.289119               | 3.204248  | 2.243455  |
| 18               | 1                | 0              | -1.682993               | 5.058243  | 1.357530  |
| 19               | 6                | 0              | -3.599933               | 4.836484  | -0.525680 |
| 20               | 7                | 0              | -0.602879               | -2.938584 | -1.595671 |
| 21               | 7                | 0              | 1.393784                | -3.539795 | -2.218579 |
| 22               | 6                | 0              | 0.692420                | -4.703838 | -1.986554 |
| 23               | 6                | 0              | -0.558078               | -4.332385 | -1.600982 |
| 24               | 6                | 0              | 0.607660                | -2.487036 | -1.970538 |
| 25               | 1                | 0              | 1.133362                | -5.680434 | -2.104911 |
| 26               | 1                | 0              | -1.401276               | -4.930560 | -1.303186 |
| 27               | 1                | 0              | 0.900996                | -1.449052 | -1.987721 |
| 28               | 6                | 0              | -4.013372               | 2.223550  | -1.425752 |
| 29               | 8                | 0              | -0.269131               | -0.289486 | -0.808683 |
| 30               | 22               | 0              | 0.961329                | -0.254454 | 0.815140  |
| 31               | 8                | 0              | 0.819332                | -2.016841 | 1.181541  |
| 32               | 8                | 0              | 2.157450                | 0.315159  | 2.074414  |
| 33               | 6                | 0              | 1.038382                | -2.971425 | 2.212312  |
| 34               | 6                | 0              | 2.309408                | 1.339431  | 3.038561  |
| 35               | 6                | 0              | 2.538388                | -3.159608 | 2.447093  |
| 36               | 1                | 0              | 0.619285                | -3.919976 | 1.841517  |
| 37               | 6                | 0              | 0.283946                | -2.574415 | 3.481984  |
| 38               | 6                | 0              | 3.092265                | 0.798928  | 4.237477  |
| 39               | 1                | 0              | 1.301211                | 1.629747  | 3.372778  |
| 40               | 6                | 0              | 2.990107                | 2.556983  | 2.407577  |
| 41               | 1                | 0              | 2.402744                | -3.434352 | -2.366377 |
| 42               | 8                | 0              | 2.230485                | -0.026841 | -0.617607 |
| 43               | 6                | 0              | 3.610020                | -0.153831 | -0.562741 |
| 44               | 1                | 0              | 3.973751                | -0.245965 | 0.473342  |
| 45               | 6                | 0              | 4.355998                | 1.000433  | -1.240167 |
| 46               | 6                | 0              | 3.677246                | 1.867946  | -2.098092 |
| 47               | 6                | 0              | 5.722719                | 1.184598  | -1.005087 |
| 48               | 6                | 0              | 4.363962                | 2.914267  | -2.717133 |
| 49               | 1                | 0              | 2.614564                | 1.721488  | -2.260206 |
| 50               | 6                | 0              | 6.408196                | 2.227572  | -1.627708 |



|    |   |   |           |           |           |
|----|---|---|-----------|-----------|-----------|
| 51 | 1 | 0 | 6.252835  | 0.512987  | -0.332214 |
| 52 | 6 | 0 | 5.728779  | 3.094953  | -2.486365 |
| 53 | 1 | 0 | 3.829805  | 3.590228  | -3.379718 |
| 54 | 1 | 0 | 7.469234  | 2.366514  | -1.437882 |
| 55 | 1 | 0 | 6.260813  | 3.910770  | -2.968552 |
| 56 | 6 | 0 | 3.937974  | -1.437699 | -1.264568 |
| 57 | 7 | 0 | 4.056163  | -2.441673 | -1.839364 |
| 58 | 6 | 0 | -6.144495 | -0.671153 | 0.781488  |
| 59 | 6 | 0 | -6.363555 | -1.962578 | 0.241024  |
| 60 | 6 | 0 | -4.528921 | 4.593920  | -1.511475 |
| 61 | 6 | 0 | -4.722939 | 3.271007  | -1.971402 |
| 62 | 1 | 0 | -5.477280 | -3.618849 | -0.789463 |
| 63 | 1 | 0 | -7.337681 | -2.434037 | 0.336943  |
| 64 | 1 | 0 | -6.952436 | -0.163693 | 1.301979  |
| 65 | 1 | 0 | -4.769523 | 0.933443  | 1.082211  |
| 66 | 1 | 0 | -4.169381 | 1.220393  | -1.804926 |
| 67 | 1 | 0 | -5.435841 | 3.077349  | -2.769006 |
| 68 | 1 | 0 | -5.099605 | 5.411058  | -1.944516 |
| 69 | 1 | 0 | -3.420802 | 5.850107  | -0.173072 |
| 70 | 1 | 0 | 2.986227  | -2.218383 | 2.780736  |
| 71 | 1 | 0 | 3.035027  | -3.470588 | 1.521132  |
| 72 | 1 | 0 | 2.720166  | -3.926360 | 3.209668  |
| 73 | 1 | 0 | -0.779588 | -2.430813 | 3.265854  |
| 74 | 1 | 0 | 0.681111  | -1.636413 | 3.884456  |
| 75 | 1 | 0 | 0.382097  | -3.351946 | 4.248975  |
| 76 | 1 | 0 | 4.100621  | 0.494172  | 3.932552  |
| 77 | 1 | 0 | 2.586383  | -0.070778 | 4.669469  |
| 78 | 1 | 0 | 3.185002  | 1.564337  | 5.017152  |
| 79 | 1 | 0 | 2.409955  | 2.923476  | 1.554303  |
| 80 | 1 | 0 | 3.993259  | 2.296844  | 2.049809  |
| 81 | 1 | 0 | 3.084757  | 3.371037  | 3.136416  |

E<sub>ZPE</sub>: B3LYP/6-31G\* = -2820.40910 (a.u.)

Gsol: B3LYP/6-311++G\*\*/(SMD,M06-2X/6-31G\*,CH2Cl2) = -2821.08520 (a.u.)

### Int<sub>11</sub>

Standard orientation:

| Center Number | Atomic Number | Atomic Type | Coordinates (Angstroms) |           |           |
|---------------|---------------|-------------|-------------------------|-----------|-----------|
|               |               |             | X                       | Y         | Z         |
| 1             | 6             | 0           | 2.744494                | -3.812362 | -0.745831 |
| 2             | 6             | 0           | 3.725203                | -2.930863 | -1.272932 |
| 3             | 6             | 0           | 1.681840                | -3.330677 | -0.028621 |
| 4             | 6             | 0           | 1.539130                | -1.934997 | 0.229759  |
| 5             | 6             | 0           | 2.533054                | -1.041695 | -0.180074 |
| 6             | 6             | 0           | 3.614289                | -1.526064 | -0.997986 |
| 7             | 6             | 0           | 2.455000                | 0.397969  | 0.200403  |
| 8             | 6             | 0           | 3.506853                | 1.025162  | 0.948020  |
| 9             | 6             | 0           | 1.341393                | 1.156341  | -0.189527 |
| 10            | 6             | 0           | 1.435247                | 2.589406  | -0.089010 |
| 11            | 6             | 0           | 2.468208                | 3.213062  | 0.571726  |
| 12            | 6             | 0           | 3.503998                | 2.446650  | 1.150143  |
| 13            | 1             | 0           | 2.841870                | -4.879524 | -0.933495 |
| 14            | 6             | 0           | 4.794828                | -3.411752 | -2.071673 |
| 15            | 1             | 0           | 0.920620                | -3.996397 | 0.365867  |
| 16            | 6             | 0           | 4.584971                | -0.667332 | -1.590127 |
| 17            | 6             | 0           | 4.563087                | 0.279568  | 1.548081  |
| 18            | 8             | 0           | 0.231786                | 0.628080  | -0.692193 |
| 19            | 1             | 0           | 2.487058                | 4.294975  | 0.673276  |
| 20            | 6             | 0           | 4.541299                | 3.058210  | 1.905643  |
| 21            | 7             | 0           | 0.487082                | 3.399734  | -0.806821 |
| 22            | 22            | 0           | -1.058000               | -0.509039 | 0.306181  |
| 23            | 7             | 0           | -1.287369               | 4.081227  | -1.851487 |
| 24            | 6             | 0           | -0.302272               | 5.007744  | -2.121536 |
| 25            | 6             | 0           | 0.813063                | 4.584241  | -1.467715 |
| 26            | 6             | 0           | -0.800880               | 3.115213  | -1.063540 |
| 27            | 1             | 0           | -0.467969               | 5.864690  | -2.754322 |
| 28            | 1             | 0           | 1.811117                | 4.987369  | -1.439990 |
| 29            | 1             | 0           | -1.365452               | 2.247835  | -0.722224 |

|    |   |   |           |           |           |
|----|---|---|-----------|-----------|-----------|
| 30 | 8 | 0 | -1.571258 | -0.235475 | 2.007917  |
| 31 | 8 | 0 | -1.832035 | -1.866282 | -0.604064 |
| 32 | 6 | 0 | -1.369971 | -0.565014 | 3.375713  |
| 33 | 6 | 0 | -2.028856 | -3.270819 | -0.528995 |
| 34 | 1 | 0 | -2.192687 | -0.084912 | 3.928172  |
| 35 | 6 | 0 | -1.463125 | -2.078010 | 3.582667  |
| 36 | 6 | 0 | -0.044657 | 0.018413  | 3.869034  |
| 37 | 1 | 0 | -1.376945 | -3.667642 | 0.263113  |
| 38 | 6 | 0 | -3.484061 | -3.566669 | -0.161472 |
| 39 | 6 | 0 | -1.621471 | -3.895334 | -1.864191 |
| 40 | 8 | 0 | 0.462459  | -1.523382 | 0.906570  |
| 41 | 1 | 0 | -2.232659 | 4.019658  | -2.242114 |
| 42 | 6 | 0 | -3.702796 | 1.747891  | -2.039251 |
| 43 | 7 | 0 | -3.740940 | 2.755038  | -2.619349 |
| 44 | 8 | 0 | -2.419113 | 0.741899  | -0.398625 |
| 45 | 6 | 0 | -3.525269 | 0.521327  | -1.195650 |
| 46 | 6 | 0 | -4.828692 | 0.262892  | -0.425212 |
| 47 | 6 | 0 | -4.863896 | 0.409587  | 0.962325  |
| 48 | 6 | 0 | -6.051913 | 0.167324  | 1.656880  |
| 49 | 6 | 0 | -7.205226 | -0.216631 | 0.971554  |
| 50 | 6 | 0 | -7.168951 | -0.364692 | -0.417371 |
| 51 | 6 | 0 | -5.983828 | -0.126991 | -1.112412 |
| 52 | 1 | 0 | -3.360185 | -0.326007 | -1.883057 |
| 53 | 1 | 0 | -3.953859 | 0.685585  | 1.483678  |
| 54 | 1 | 0 | -6.073932 | 0.277592  | 2.738193  |
| 55 | 1 | 0 | -8.127379 | -0.404656 | 1.515247  |
| 56 | 1 | 0 | -8.061368 | -0.668874 | -0.958097 |
| 57 | 1 | 0 | -5.958568 | -0.245267 | -2.194354 |
| 58 | 6 | 0 | 5.546961  | 2.304347  | 2.461429  |
| 59 | 6 | 0 | 5.547455  | 0.898995  | 2.283883  |
| 60 | 6 | 0 | 5.604958  | -1.164051 | -2.372566 |
| 61 | 6 | 0 | 5.724242  | -2.552174 | -2.611869 |
| 62 | 1 | 0 | 4.519128  | 4.137508  | 2.040901  |
| 63 | 1 | 0 | 6.333634  | 2.779152  | 3.041132  |
| 64 | 1 | 0 | 6.332884  | 0.301476  | 2.738953  |
| 65 | 1 | 0 | 4.572113  | -0.797599 | 1.430019  |
| 66 | 1 | 0 | 4.509010  | 0.402371  | -1.432168 |
| 67 | 1 | 0 | 6.323472  | -0.478235 | -2.814707 |
| 68 | 1 | 0 | 6.536352  | -2.932236 | -3.225721 |
| 69 | 1 | 0 | 4.859017  | -4.481893 | -2.257528 |
| 70 | 1 | 0 | -0.665626 | -2.581975 | 3.029052  |
| 71 | 1 | 0 | -2.429503 | -2.453064 | 3.227723  |
| 72 | 1 | 0 | -1.368774 | -2.327409 | 4.646369  |
| 73 | 1 | 0 | -0.024776 | 1.103069  | 3.715632  |
| 74 | 1 | 0 | 0.791229  | -0.425601 | 3.321153  |
| 75 | 1 | 0 | 0.087611  | -0.178972 | 4.939660  |
| 76 | 1 | 0 | -4.162078 | -3.185285 | -0.933526 |
| 77 | 1 | 0 | -3.748264 | -3.088419 | 0.787089  |
| 78 | 1 | 0 | -3.644643 | -4.646995 | -0.062898 |
| 79 | 1 | 0 | -0.575837 | -3.665082 | -2.089673 |
| 80 | 1 | 0 | -2.246402 | -3.501197 | -2.674106 |
| 81 | 1 | 0 | -1.740595 | -4.985166 | -1.834698 |

E<sub>ZPE</sub>: B3LYP/6-31G\* = -2820.40710 (a.u.)

Gsol: B3LYP/6-311++G\*\*/(SMD,M06-2X/6-31G\*,CH2Cl2) = -2821.08314 (a.u.)

### Int<sub>12</sub>

Standard orientation:

| Center Number | Atomic Number | Atomic Type | Coordinates (Angstroms) |           |           |
|---------------|---------------|-------------|-------------------------|-----------|-----------|
|               |               |             | X                       | Y         | Z         |
| 1             | 8             | 0           | -2.332684               | 0.935493  | -0.207798 |
| 2             | 6             | 0           | -3.614930               | 1.214972  | 0.229461  |
| 3             | 1             | 0           | -3.688215               | 1.164825  | 1.329758  |
| 4             | 6             | 0           | -4.704838               | 0.323273  | -0.374703 |
| 5             | 6             | 0           | -5.865632               | 0.034947  | 0.348366  |
| 6             | 6             | 0           | -4.551424               | -0.186792 | -1.667350 |
| 7             | 6             | 0           | -6.869022               | -0.755668 | -0.215348 |
| 8             | 1             | 0           | -5.984797               | 0.424635  | 1.357295  |

|    |    |   |           |           |           |
|----|----|---|-----------|-----------|-----------|
| 9  | 6  | 0 | -5.554171 | -0.976397 | -2.230775 |
| 10 | 1  | 0 | -3.636062 | 0.024729  | -2.210503 |
| 11 | 6  | 0 | -6.715467 | -1.261299 | -1.507372 |
| 12 | 1  | 0 | -7.765817 | -0.979897 | 0.356124  |
| 13 | 1  | 0 | -5.429346 | -1.370938 | -3.235918 |
| 14 | 1  | 0 | -7.494572 | -1.878315 | -1.947120 |
| 15 | 6  | 0 | -3.896375 | 2.634389  | -0.166321 |
| 16 | 7  | 0 | -3.993685 | 3.732371  | -0.537568 |
| 17 | 1  | 0 | -2.304990 | 4.429696  | -1.358793 |
| 18 | 6  | 0 | 2.891608  | 3.170791  | -0.121114 |
| 19 | 6  | 0 | 3.965695  | 2.382325  | 0.339925  |
| 20 | 6  | 0 | 3.795169  | 0.959874  | 0.410787  |
| 21 | 6  | 0 | 2.554972  | 0.360338  | 0.011293  |
| 22 | 6  | 0 | 1.456783  | 1.172994  | -0.316949 |
| 23 | 6  | 0 | 1.687709  | 2.588226  | -0.447710 |
| 24 | 6  | 0 | 2.412561  | -1.122210 | -0.021827 |
| 25 | 6  | 0 | 1.450366  | -1.735216 | 0.782236  |
| 26 | 6  | 0 | 1.415497  | -3.156912 | 0.895753  |
| 27 | 6  | 0 | 2.261262  | -3.945073 | 0.160289  |
| 28 | 6  | 0 | 3.250193  | -1.937526 | -0.859443 |
| 29 | 6  | 0 | 3.178796  | -3.367755 | -0.758372 |
| 30 | 1  | 0 | 3.017916  | 4.248467  | -0.172396 |
| 31 | 6  | 0 | 5.194014  | 2.975095  | 0.742099  |
| 32 | 6  | 0 | 4.884713  | 0.197499  | 0.927295  |
| 33 | 8  | 0 | 0.561881  | -1.015282 | 1.485566  |
| 34 | 1  | 0 | 0.699713  | -3.588362 | 1.589159  |
| 35 | 1  | 0 | 2.228711  | -5.028107 | 0.258832  |
| 36 | 6  | 0 | 4.011335  | -4.172794 | -1.578534 |
| 37 | 7  | 0 | 0.647348  | 3.441917  | -0.959932 |
| 38 | 7  | 0 | -1.286427 | 4.325626  | -1.390659 |
| 39 | 6  | 0 | -0.346261 | 5.178816  | -1.926764 |
| 40 | 6  | 0 | 0.868570  | 4.623796  | -1.666013 |
| 41 | 6  | 0 | -0.678321 | 3.280685  | -0.817074 |
| 42 | 1  | 0 | -0.612314 | 6.082968  | -2.450133 |
| 43 | 1  | 0 | 1.859758  | 4.941448  | -1.940254 |
| 44 | 1  | 0 | -1.191756 | 2.425304  | -0.381242 |
| 45 | 6  | 0 | 4.144051  | -1.391698 | -1.824593 |
| 46 | 8  | 0 | 0.240319  | 0.701944  | -0.549654 |
| 47 | 22 | 0 | -1.017356 | -0.335887 | 0.587817  |
| 48 | 8  | 0 | -1.768703 | -0.014190 | 2.203955  |
| 49 | 8  | 0 | -1.562606 | -1.828799 | -0.198762 |
| 50 | 6  | 0 | -1.636202 | -0.134071 | 3.613563  |
| 51 | 6  | 0 | -1.972463 | -3.177141 | -0.343423 |
| 52 | 6  | 0 | -1.502343 | -1.601007 | 4.026856  |
| 53 | 1  | 0 | -2.568358 | 0.264694  | 4.044152  |
| 54 | 6  | 0 | -0.467728 | 0.723230  | 4.106375  |
| 55 | 6  | 0 | -2.110817 | -3.488662 | -1.834178 |
| 56 | 6  | 0 | -3.264371 | -3.425484 | 0.435756  |
| 57 | 1  | 0 | -1.174359 | -3.807199 | 0.073610  |
| 58 | 6  | 0 | 6.058042  | 0.799948  | 1.319141  |
| 59 | 6  | 0 | 6.225643  | 2.203186  | 1.218320  |
| 60 | 6  | 0 | 4.875053  | -3.608514 | -2.490053 |
| 61 | 6  | 0 | 4.929346  | -2.201340 | -2.616456 |
| 62 | 1  | 0 | 7.160221  | 2.663021  | 1.527295  |
| 63 | 1  | 0 | 5.297005  | 4.055978  | 0.672439  |
| 64 | 1  | 0 | 6.865284  | 0.191127  | 1.717591  |
| 65 | 1  | 0 | 4.771997  | -0.875362 | 1.023974  |
| 66 | 1  | 0 | 4.193198  | -0.315115 | -1.944862 |
| 67 | 1  | 0 | 5.594891  | -1.752068 | -3.349390 |
| 68 | 1  | 0 | 5.503508  | -4.236619 | -3.115663 |
| 69 | 1  | 0 | 3.944973  | -5.254231 | -1.477971 |
| 70 | 1  | 0 | -0.585547 | -2.025853 | 3.609413  |
| 71 | 1  | 0 | -2.357795 | -2.180162 | 3.661953  |
| 72 | 1  | 0 | -1.469935 | -1.690163 | 5.119493  |
| 73 | 1  | 0 | -0.610120 | 1.768017  | 3.807011  |
| 74 | 1  | 0 | 0.470525  | 0.360786  | 3.676579  |
| 75 | 1  | 0 | -0.396155 | 0.688011  | 5.200154  |
| 76 | 1  | 0 | -1.171373 | -3.277870 | -2.354668 |
| 77 | 1  | 0 | -2.902150 | -2.875651 | -2.278812 |
| 78 | 1  | 0 | -2.362710 | -4.545492 | -1.982940 |

|    |   |   |           |           |          |
|----|---|---|-----------|-----------|----------|
| 79 | 1 | 0 | -4.076718 | -2.805774 | 0.042483 |
| 80 | 1 | 0 | -3.125526 | -3.183866 | 1.494645 |
| 81 | 1 | 0 | -3.559638 | -4.478822 | 0.358509 |

E<sub>ZPE</sub>: B3LYP/6-31G\* = -2820.40651 (a.u.)  
Gsol: B3LYP/6-311++G\*\*/(SMD,M06-2X/6-31G\*,CH2Cl2) = -2821.08249 (a.u.)

TS<sub>7</sub>

Standard orientation:

| Center Number | Atomic Number | Atomic Type | Coordinates (Angstroms) |           |           |
|---------------|---------------|-------------|-------------------------|-----------|-----------|
|               |               |             | X                       | Y         | Z         |
| 1             | 6             | 0           | -2.565629               | -3.358309 | -0.800123 |
| 2             | 6             | 0           | -3.782692               | -2.765220 | -0.382207 |
| 3             | 6             | 0           | -3.799062               | -1.372649 | -0.028339 |
| 4             | 6             | 0           | -2.613627               | -0.567872 | -0.183415 |
| 5             | 6             | 0           | -1.420540               | -1.192734 | -0.544332 |
| 6             | 6             | 0           | -1.425825               | -2.602861 | -0.844314 |
| 7             | 6             | 0           | -2.624458               | 0.899127  | 0.088537  |
| 8             | 6             | 0           | -1.741178               | 1.449342  | 1.024323  |
| 9             | 6             | 0           | -1.881740               | 2.807518  | 1.428924  |
| 10            | 6             | 0           | -2.811251               | 3.628161  | 0.845893  |
| 11            | 6             | 0           | -3.532009               | 1.778401  | -0.603096 |
| 12            | 6             | 0           | -3.635799               | 3.153950  | -0.208183 |
| 13            | 1             | 0           | -2.531683               | -4.417263 | -1.042286 |
| 14            | 6             | 0           | -4.965055               | -3.542949 | -0.260003 |
| 15            | 6             | 0           | -5.014583               | -0.850045 | 0.499268  |
| 16            | 8             | 0           | -0.751029               | 0.727751  | 1.593305  |
| 17            | 1             | 0           | -1.228682               | 3.166992  | 2.217825  |
| 18            | 1             | 0           | -2.911110               | 4.662025  | 1.168856  |
| 19            | 6             | 0           | -4.538959               | 4.015137  | -0.884492 |
| 20            | 7             | 0           | -0.125494               | -3.200661 | -1.011574 |
| 21            | 7             | 0           | 2.040236                | -2.761182 | -1.096007 |
| 22            | 6             | 0           | 1.821996                | -3.659726 | -0.052189 |
| 23            | 6             | 0           | 0.496021                | -3.940930 | 0.008123  |
| 24            | 6             | 0           | 0.850799                | -2.524933 | -1.647553 |
| 25            | 1             | 0           | 2.634778                | -4.015819 | 0.561745  |
| 26            | 1             | 0           | -0.082201               | -4.567038 | 0.668709  |
| 27            | 1             | 0           | 0.681516                | -1.817275 | -2.442256 |
| 28            | 8             | 0           | -0.259237               | -0.535755 | -0.655532 |
| 29            | 22            | 0           | 0.862659                | 0.272208  | 0.689313  |
| 30            | 8             | 0           | 1.448984                | -0.610887 | 2.134129  |
| 31            | 8             | 0           | 1.446679                | 1.958202  | 0.424098  |
| 32            | 6             | 0           | 1.051961                | -0.838099 | 3.484082  |
| 33            | 6             | 0           | 1.721493                | 3.177097  | 1.105799  |
| 34            | 6             | 0           | 0.997721                | -2.342355 | 3.747195  |
| 35            | 1             | 0           | 0.045076                | -0.413771 | 3.600122  |
| 36            | 6             | 0           | 2.017734                | -0.114771 | 4.422566  |
| 37            | 1             | 0           | 1.062308                | 3.226960  | 1.984980  |
| 38            | 6             | 0           | 1.392106                | 4.344352  | 0.176036  |
| 39            | 6             | 0           | 3.174833                | 3.190179  | 1.583194  |
| 40            | 1             | 0           | 2.547655                | -1.726018 | -0.876001 |
| 41            | 6             | 0           | 2.805513                | 0.153235  | -2.750968 |
| 42            | 7             | 0           | 2.381458                | -0.085638 | -3.805893 |
| 43            | 8             | 0           | 2.537599                | -0.406328 | -0.473631 |
| 44            | 6             | 0           | 3.272774                | 0.402452  | -1.358658 |
| 45            | 1             | 0           | 3.030273                | 1.451199  | -1.134489 |
| 46            | 6             | 0           | 4.785870                | 0.206281  | -1.222995 |
| 47            | 6             | 0           | 5.659176                | 0.453809  | -2.287676 |
| 48            | 6             | 0           | 5.307207                | -0.171491 | 0.019136  |
| 49            | 6             | 0           | 7.037742                | 0.326079  | -2.111733 |
| 50            | 1             | 0           | 5.263935                | 0.736811  | -3.259950 |
| 51            | 6             | 0           | 6.686173                | -0.299571 | 0.192183  |
| 52            | 1             | 0           | 4.624146                | -0.368840 | 0.838986  |
| 53            | 6             | 0           | 7.555401                | -0.050872 | -0.871463 |
| 54            | 1             | 0           | 7.705788                | 0.515378  | -2.947752 |
| 55            | 1             | 0           | 7.081413                | -0.595706 | 1.160576  |
| 56            | 1             | 0           | 8.628847                | -0.153323 | -0.736203 |
| 57            | 6             | 0           | -6.139341               | -1.634795 | 0.625577  |

|    |   |   |           |           |           |
|----|---|---|-----------|-----------|-----------|
| 58 | 6 | 0 | -6.126388 | -2.992335 | 0.228518  |
| 59 | 6 | 0 | -4.320229 | 1.353607  | -1.710825 |
| 60 | 6 | 0 | -5.173842 | 2.218977  | -2.359614 |
| 61 | 6 | 0 | -5.299723 | 3.562714  | -1.938159 |
| 62 | 1 | 0 | -4.927710 | -4.591133 | -0.548198 |
| 63 | 1 | 0 | -7.024134 | -3.596554 | 0.324313  |
| 64 | 1 | 0 | -7.047356 | -1.205116 | 1.040165  |
| 65 | 1 | 0 | -5.045498 | 0.184742  | 0.817090  |
| 66 | 1 | 0 | -4.229232 | 0.331657  | -2.060825 |
| 67 | 1 | 0 | -5.751750 | 1.864911  | -3.209398 |
| 68 | 1 | 0 | -5.981759 | 4.233516  | -2.453375 |
| 69 | 1 | 0 | -4.606532 | 5.051042  | -0.559091 |
| 70 | 1 | 0 | 0.650886  | -2.540528 | 4.768060  |
| 71 | 1 | 0 | 0.308886  | -2.827869 | 3.048742  |
| 72 | 1 | 0 | 1.990364  | -2.792142 | 3.626504  |
| 73 | 1 | 0 | 1.713072  | -0.249366 | 5.467125  |
| 74 | 1 | 0 | 3.035209  | -0.505879 | 4.306091  |
| 75 | 1 | 0 | 2.033343  | 0.958528  | 4.206346  |
| 76 | 1 | 0 | 1.555674  | 5.300715  | 0.686855  |
| 77 | 1 | 0 | 2.029516  | 4.316420  | -0.715335 |
| 78 | 1 | 0 | 0.347272  | 4.292118  | -0.143404 |
| 79 | 1 | 0 | 3.864852  | 3.146825  | 0.732638  |
| 80 | 1 | 0 | 3.385254  | 4.105751  | 2.148319  |
| 81 | 1 | 0 | 3.376207  | 2.330571  | 2.230902  |

E<sub>ZPE</sub>: B3LYP/6-31G\* = -2820.39029 (a.u.)

Gsol: B3LYP/6-311++G\*\*/(SMD,M06-2X/6-31G\*,CH2Cl2) = -2821.06194 (a.u.)

### TS<sub>8</sub>

Standard orientation:

| Center Number | Atomic Number | Atomic Type | Coordinates (Angstroms) |           |           |
|---------------|---------------|-------------|-------------------------|-----------|-----------|
|               |               |             | X                       | Y         | Z         |
| 1             | 6             | 0           | 5.046126                | -0.028997 | 0.380468  |
| 2             | 7             | 0           | 5.984465                | -0.322986 | 0.998306  |
| 3             | 8             | 0           | 2.744716                | -0.462956 | 0.058368  |
| 4             | 6             | 0           | 3.821160                | 0.331614  | -0.377952 |
| 5             | 1             | 0           | 3.591441                | 1.374916  | -0.120715 |
| 6             | 6             | 0           | 4.023763                | 0.238329  | -1.893555 |
| 7             | 6             | 0           | 2.909726                | 0.480003  | -2.712042 |
| 8             | 6             | 0           | 5.253017                | -0.059715 | -2.486847 |
| 9             | 6             | 0           | 3.028150                | 0.424127  | -4.099772 |
| 10            | 1             | 0           | 1.950503                | 0.707073  | -2.254273 |
| 11            | 6             | 0           | 5.369958                | -0.115666 | -3.878780 |
| 12            | 1             | 0           | 6.122483                | -0.250756 | -1.864182 |
| 13            | 6             | 0           | 4.260712                | 0.125041  | -4.687969 |
| 14            | 1             | 0           | 2.159408                | 0.619734  | -4.723180 |
| 15            | 1             | 0           | 6.331562                | -0.351687 | -4.326763 |
| 16            | 1             | 0           | 4.353285                | 0.081627  | -5.769883 |
| 17            | 1             | 0           | 2.830335                | -1.810398 | -0.358929 |
| 18            | 6             | 0           | -2.284073               | -3.340451 | -0.795751 |
| 19            | 6             | 0           | -3.530366               | -2.718128 | -0.538033 |
| 20            | 6             | 0           | -3.562460               | -1.316010 | -0.224318 |
| 21            | 6             | 0           | -2.351297               | -0.536964 | -0.249188 |
| 22            | 6             | 0           | -1.134364               | -1.188176 | -0.447643 |
| 23            | 6             | 0           | -1.132742               | -2.604350 | -0.721321 |
| 24            | 6             | 0           | -2.358021               | 0.935845  | -0.013806 |
| 25            | 6             | 0           | -1.582966               | 1.482471  | 1.016327  |
| 26            | 6             | 0           | -1.722585               | 2.858258  | 1.359810  |
| 27            | 6             | 0           | -2.535870               | 3.691240  | 0.637155  |
| 28            | 6             | 0           | -3.140249               | 1.820529  | -0.837258 |
| 29            | 6             | 0           | -3.239315               | 3.211512  | -0.498863 |
| 30            | 1             | 0           | -2.242392               | -4.404651 | -1.012660 |
| 31            | 6             | 0           | -4.734303               | -3.472257 | -0.541323 |
| 32            | 6             | 0           | -4.823015               | -0.757271 | 0.133487  |
| 33            | 8             | 0           | -0.711969               | 0.741670  | 1.730540  |
| 34            | 1             | 0           | -1.163434               | 3.221931  | 2.215754  |
| 35            | 1             | 0           | -2.635141               | 4.738290  | 0.914674  |
| 36            | 6             | 0           | -4.019075               | 4.079925  | -1.306576 |

|    |    |   |           |           |           |
|----|----|---|-----------|-----------|-----------|
| 37 | 7  | 0 | 0.167605  | -3.224738 | -0.742970 |
| 38 | 7  | 0 | 2.337123  | -2.823331 | -0.608832 |
| 39 | 6  | 0 | 2.002330  | -3.719536 | 0.405876  |
| 40 | 6  | 0 | 0.672606  | -3.979981 | 0.329664  |
| 41 | 6  | 0 | 1.212833  | -2.564848 | -1.273320 |
| 42 | 1  | 0 | 2.744656  | -4.087884 | 1.097018  |
| 43 | 1  | 0 | 0.021287  | -4.599170 | 0.925517  |
| 44 | 1  | 0 | 1.134515  | -1.846172 | -2.070341 |
| 45 | 6  | 0 | -3.806270 | 1.385330  | -2.019033 |
| 46 | 8  | 0 | 0.043062  | -0.550810 | -0.425998 |
| 47 | 22 | 0 | 1.008881  | 0.199091  | 1.089646  |
| 48 | 8  | 0 | 1.346603  | -0.775901 | 2.536904  |
| 49 | 8  | 0 | 1.713301  | 1.863885  | 1.022858  |
| 50 | 6  | 0 | 0.982711  | -1.179449 | 3.853002  |
| 51 | 6  | 0 | 1.894913  | 3.013966  | 1.843513  |
| 52 | 6  | 0 | -0.315276 | -1.986194 | 3.806029  |
| 53 | 6  | 0 | 0.884085  | 0.042720  | 4.766245  |
| 54 | 1  | 0 | 1.798114  | -1.825684 | 4.209156  |
| 55 | 6  | 0 | 3.238491  | 2.930337  | 2.570565  |
| 56 | 1  | 0 | 1.090155  | 3.023430  | 2.593065  |
| 57 | 6  | 0 | 1.777591  | 4.262951  | 0.969960  |
| 58 | 6  | 0 | -5.970170 | -1.519205 | 0.140597  |
| 59 | 6  | 0 | -5.935250 | -2.888295 | -0.214016 |
| 60 | 6  | 0 | -4.664920 | 3.618164  | -2.430713 |
| 61 | 6  | 0 | -4.542634 | 2.256617  | -2.791918 |
| 62 | 1  | 0 | -6.849846 | -3.474566 | -0.212735 |
| 63 | 1  | 0 | -6.913812 | -1.062686 | 0.427096  |
| 64 | 1  | 0 | -4.871371 | 0.287329  | 0.415356  |
| 65 | 1  | 0 | -4.683494 | -4.528724 | -0.795242 |
| 66 | 1  | 0 | -3.717225 | 0.348318  | -2.322208 |
| 67 | 1  | 0 | -5.030704 | 1.892797  | -3.692535 |
| 68 | 1  | 0 | -5.254255 | 4.293811  | -3.044553 |
| 69 | 1  | 0 | -4.085828 | 5.128021  | -1.022687 |
| 70 | 1  | 0 | -0.194582 | -2.866552 | 3.165834  |
| 71 | 1  | 0 | -1.124946 | -1.370992 | 3.402121  |
| 72 | 1  | 0 | -0.592955 | -2.326456 | 4.810440  |
| 73 | 1  | 0 | 0.083532  | 0.705564  | 4.422827  |
| 74 | 1  | 0 | 1.827614  | 0.598540  | 4.765126  |
| 75 | 1  | 0 | 0.668599  | -0.264851 | 5.796145  |
| 76 | 1  | 0 | 4.070176  | 2.945169  | 1.856748  |
| 77 | 1  | 0 | 3.307756  | 2.006972  | 3.154635  |
| 78 | 1  | 0 | 3.359279  | 3.780651  | 3.251924  |
| 79 | 1  | 0 | 0.807134  | 4.287374  | 0.465692  |
| 80 | 1  | 0 | 2.565328  | 4.269762  | 0.207760  |
| 81 | 1  | 0 | 1.879667  | 5.169285  | 1.578645  |

E<sub>ZPE</sub>: B3LYP/6-31G\* = -2820.38773 (a.u.)

Gsol: B3LYP/6-311++G\*\*/(SMD,M06-2X/6-31G\*,CH2Cl2) = -2821.05937 (a.u.)

TS<sub>9</sub>

Standard orientation:

| Center<br>Number | Atomic<br>Number | Atomic<br>Type | Coordinates (Angstroms) |           |           |
|------------------|------------------|----------------|-------------------------|-----------|-----------|
|                  |                  |                | X                       | Y         | Z         |
| 1                | 6                | 0              | -3.129941               | 3.647786  | 0.478705  |
| 2                | 6                | 0              | -4.013372               | 2.950454  | -0.386616 |
| 3                | 6                | 0              | -2.068317               | 3.004807  | 1.059650  |
| 4                | 6                | 0              | -1.839110               | 1.615805  | 0.837931  |
| 5                | 6                | 0              | -2.771275               | 0.854899  | 0.124583  |
| 6                | 6                | 0              | -3.828204               | 1.539838  | -0.574298 |
| 7                | 6                | 0              | -2.677966               | -0.632998 | 0.112859  |
| 8                | 6                | 0              | -3.780167               | -1.446820 | 0.565575  |
| 9                | 6                | 0              | -1.502755               | -1.263874 | -0.296497 |
| 10               | 6                | 0              | -1.484597               | -2.702299 | -0.393982 |
| 11               | 6                | 0              | -2.555320               | -3.484974 | -0.063256 |
| 12               | 6                | 0              | -3.729615               | -2.877391 | 0.445082  |
| 13               | 1                | 0              | -3.294519               | 4.707984  | 0.657376  |
| 14               | 6                | 0              | -5.060045               | 3.621296  | -1.071634 |
| 15               | 1                | 0              | -1.375806               | 3.531104  | 1.708891  |

|    |    |   |           |           |           |
|----|----|---|-----------|-----------|-----------|
| 16 | 6  | 0 | -4.696574 | 0.881092  | -1.491155 |
| 17 | 6  | 0 | -4.940127 | -0.887942 | 1.175239  |
| 18 | 8  | 0 | -0.386446 | -0.603789 | -0.642438 |
| 19 | 1  | 0 | -2.493795 | -4.565785 | -0.155426 |
| 20 | 6  | 0 | -4.831509 | -3.666878 | 0.869131  |
| 21 | 7  | 0 | -0.242130 | -3.252116 | -0.876696 |
| 22 | 22 | 0 | 0.802172  | 0.390985  | 0.501961  |
| 23 | 7  | 0 | 1.911530  | -2.811140 | -1.063727 |
| 24 | 6  | 0 | 1.426651  | -3.119599 | -2.332480 |
| 25 | 6  | 0 | 0.098466  | -3.390801 | -2.226650 |
| 26 | 6  | 0 | 0.882395  | -2.904409 | -0.229415 |
| 27 | 1  | 0 | 2.063364  | -3.083432 | -3.202496 |
| 28 | 1  | 0 | -0.643261 | -3.651468 | -2.964877 |
| 29 | 1  | 0 | 0.905186  | -2.598327 | 0.805951  |
| 30 | 8  | 0 | 1.429975  | -0.494954 | 1.938589  |
| 31 | 8  | 0 | 1.526034  | 1.985537  | 0.025897  |
| 32 | 6  | 0 | 2.647977  | -0.649343 | 2.662652  |
| 33 | 6  | 0 | 1.223804  | 3.374343  | -0.083046 |
| 34 | 1  | 0 | 3.456858  | -0.749853 | 1.925759  |
| 35 | 6  | 0 | 2.901645  | 0.589875  | 3.521426  |
| 36 | 6  | 0 | 2.561121  | -1.925309 | 3.500948  |
| 37 | 6  | 0 | 1.693852  | 4.096488  | 1.179867  |
| 38 | 6  | 0 | 1.871742  | 3.931236  | -1.351592 |
| 39 | 1  | 0 | 0.136193  | 3.485843  | -0.171491 |
| 40 | 8  | 0 | -0.730230 | 1.070809  | 1.371547  |
| 41 | 1  | 0 | 2.476202  | -1.831899 | -0.840670 |
| 42 | 6  | 0 | 3.338643  | -0.249171 | -2.764096 |
| 43 | 7  | 0 | 3.247936  | -0.699941 | -3.831161 |
| 44 | 8  | 0 | 2.497168  | -0.449120 | -0.561771 |
| 45 | 6  | 0 | 3.415478  | 0.254713  | -1.366570 |
| 46 | 6  | 0 | 4.839783  | 0.171352  | -0.820294 |
| 47 | 6  | 0 | 5.761995  | -0.786928 | -1.252947 |
| 48 | 6  | 0 | 7.032177  | -0.855561 | -0.676844 |
| 49 | 6  | 0 | 7.391741  | 0.032857  | 0.337201  |
| 50 | 6  | 0 | 6.476271  | 0.994308  | 0.772681  |
| 51 | 6  | 0 | 5.208995  | 1.062989  | 0.195518  |
| 52 | 1  | 0 | 3.115019  | 1.308638  | -1.387796 |
| 53 | 1  | 0 | 5.494477  | -1.472653 | -2.052764 |
| 54 | 1  | 0 | 7.741606  | -1.601623 | -1.024996 |
| 55 | 1  | 0 | 8.381737  | -0.019017 | 0.782452  |
| 56 | 1  | 0 | 6.752166  | 1.694406  | 1.556956  |
| 57 | 1  | 0 | 4.492059  | 1.808005  | 0.531344  |
| 58 | 6  | 0 | -5.985344 | -1.680899 | 1.594285  |
| 59 | 6  | 0 | -5.944522 | -3.084872 | 1.428295  |
| 60 | 6  | 0 | -5.889449 | 2.947342  | -1.938545 |
| 61 | 6  | 0 | -5.692142 | 1.564019  | -2.155186 |
| 62 | 1  | 0 | -4.769333 | -4.746763 | 0.755008  |
| 63 | 1  | 0 | -6.780307 | -3.696881 | 1.755535  |
| 64 | 1  | 0 | -6.850628 | -1.220417 | 2.063522  |
| 65 | 1  | 0 | -4.990271 | 0.183639  | 1.322805  |
| 66 | 1  | 0 | -4.555796 | -0.176705 | -1.682546 |
| 67 | 1  | 0 | -6.329318 | 1.033301  | -2.857942 |
| 68 | 1  | 0 | -6.682536 | 3.473073  | -2.463142 |
| 69 | 1  | 0 | -5.185104 | 4.689103  | -0.905266 |
| 70 | 1  | 0 | 2.094093  | 0.722523  | 4.250325  |
| 71 | 1  | 0 | 2.951218  | 1.487092  | 2.896033  |
| 72 | 1  | 0 | 3.849752  | 0.495332  | 4.063535  |
| 73 | 1  | 0 | 2.398442  | -2.802906 | 2.865306  |
| 74 | 1  | 0 | 1.733038  | -1.858690 | 4.215428  |
| 75 | 1  | 0 | 3.491362  | -2.081762 | 4.059117  |
| 76 | 1  | 0 | 2.781121  | 4.006961  | 1.291882  |
| 77 | 1  | 0 | 1.219459  | 3.665707  | 2.067562  |
| 78 | 1  | 0 | 1.441347  | 5.162485  | 1.133589  |
| 79 | 1  | 0 | 1.531003  | 3.377166  | -2.232458 |
| 80 | 1  | 0 | 2.964660  | 3.860160  | -1.295993 |
| 81 | 1  | 0 | 1.604863  | 4.985915  | -1.486301 |

-----  
E<sub>ZPE</sub>: B3LYP/6-31G\* = -2820.38917 (a.u.)  
Gsol: B3LYP/6-311++G\*\*/(SMD,M06-2X/6-31G\*,CH2Cl2) = -2821.05953 (a.u.)

TS<sub>10</sub>

Standard orientation:

| Center<br>Number | Atomic<br>Number | Atomic<br>Type | Coordinates (Angstroms) |           |           |
|------------------|------------------|----------------|-------------------------|-----------|-----------|
|                  |                  |                | X                       | Y         | Z         |
| 1                | 6                | 0              | 4.789914                | -0.039641 | 1.068919  |
| 2                | 7                | 0              | 5.480416                | -0.221778 | 1.985144  |
| 3                | 8                | 0              | 2.636391                | -0.442907 | 0.178795  |
| 4                | 6                | 0              | 3.858983                | 0.194580  | -0.068551 |
| 5                | 1                | 0              | 3.679171                | 1.278819  | -0.095688 |
| 6                | 6                | 0              | 4.473948                | -0.227638 | -1.408611 |
| 7                | 6                | 0              | 3.612761                | -0.421755 | -2.496949 |
| 8                | 6                | 0              | 5.851930                | -0.377978 | -1.593478 |
| 9                | 6                | 0              | 4.125222                | -0.759202 | -3.750056 |
| 10               | 1                | 0              | 2.542529                | -0.314947 | -2.348944 |
| 11               | 6                | 0              | 6.362987                | -0.716157 | -2.848727 |
| 12               | 1                | 0              | 6.529500                | -0.239358 | -0.755358 |
| 13               | 6                | 0              | 5.502705                | -0.907786 | -3.930123 |
| 14               | 1                | 0              | 3.447198                | -0.902997 | -4.587662 |
| 15               | 1                | 0              | 7.435676                | -0.834736 | -2.976911 |
| 16               | 1                | 0              | 5.901627                | -1.171707 | -4.906000 |
| 17               | 1                | 0              | 2.710391                | -1.868286 | 0.089431  |
| 18               | 6                | 0              | -2.380410               | -3.470208 | 0.273614  |
| 19               | 6                | 0              | -3.621377               | -2.807336 | 0.437651  |
| 20               | 6                | 0              | -3.671647               | -1.377509 | 0.306548  |
| 21               | 6                | 0              | -2.487789               | -0.630848 | -0.039290 |
| 22               | 6                | 0              | -1.263413               | -1.297459 | -0.097725 |
| 23               | 6                | 0              | -1.253020               | -2.733806 | 0.036560  |
| 24               | 6                | 0              | -2.549742               | 0.837561  | -0.287218 |
| 25               | 6                | 0              | -3.411054               | 1.388404  | -1.300049 |
| 26               | 6                | 0              | -3.584654               | 2.809853  | -1.394222 |
| 27               | 6                | 0              | -2.884220               | 3.646008  | -0.485545 |
| 28               | 6                | 0              | -1.770999               | 1.708766  | 0.481634  |
| 29               | 6                | 0              | -1.997054               | 3.114553  | 0.413944  |
| 30               | 1                | 0              | -2.320418               | -4.551157 | 0.366032  |
| 31               | 6                | 0              | -4.798477               | -3.534108 | 0.759608  |
| 32               | 6                | 0              | -4.921821               | -0.745123 | 0.565347  |
| 33               | 7                | 0              | 0.046832                | -3.338061 | -0.129090 |
| 34               | 6                | 0              | -4.088680               | 0.579966  | -2.257129 |
| 35               | 6                | 0              | -4.439419               | 3.350661  | -2.390044 |
| 36               | 1                | 0              | -3.048022               | 4.720598  | -0.525163 |
| 37               | 1                | 0              | -1.450248               | 3.747117  | 1.105513  |
| 38               | 8                | 0              | -0.833941               | 1.256194  | 1.333924  |
| 39               | 8                | 0              | -0.091502               | -0.680602 | -0.310444 |
| 40               | 22               | 0              | 0.857278                | 0.490351  | 0.918264  |
| 41               | 8                | 0              | 1.657499                | 2.046784  | 0.472366  |
| 42               | 8                | 0              | 1.110676                | -0.191818 | 2.548627  |
| 43               | 6                | 0              | 1.508116                | 3.450902  | 0.299780  |
| 44               | 6                | 0              | 1.333949                | -0.080224 | 3.951182  |
| 45               | 6                | 0              | 1.560260                | 4.148589  | 1.658904  |
| 46               | 6                | 0              | 0.012235                | 0.244372  | 4.648118  |
| 47               | 1                | 0              | 0.526855                | 3.629887  | -0.158230 |
| 48               | 6                | 0              | 2.589896                | 3.954166  | -0.657359 |
| 49               | 6                | 0              | 2.431375                | 0.942049  | 4.241421  |
| 50               | 1                | 0              | 1.681025                | -1.069553 | 4.284791  |
| 51               | 7                | 0              | 2.203906                | -2.881854 | -0.045364 |
| 52               | 6                | 0              | 1.928639                | -3.414439 | -1.301647 |
| 53               | 6                | 0              | 0.600656                | -3.698362 | -1.363543 |
| 54               | 6                | 0              | 1.053392                | -2.856604 | 0.618311  |
| 55               | 1                | 0              | 2.702592                | -3.532225 | -2.044037 |
| 56               | 1                | 0              | -0.013408               | -4.106605 | -2.150650 |
| 57               | 1                | 0              | 0.913709                | -2.384411 | 1.579702  |
| 58               | 6                | 0              | -5.090027               | 2.536043  | -3.288414 |
| 59               | 6                | 0              | -4.899030               | 1.136427  | -3.222620 |
| 60               | 6                | 0              | -6.042545               | -1.475443 | 0.892871  |
| 61               | 6                | 0              | -5.991196               | -2.886467 | 0.979114  |
| 62               | 1                | 0              | -4.732680               | -4.616656 | 0.842469  |
| 63               | 1                | 0              | -6.885321               | -3.449726 | 1.231027  |
| 64               | 1                | 0              | -6.977544               | -0.958926 | 1.092823  |



|    |   |   |           |           |           |
|----|---|---|-----------|-----------|-----------|
| 65 | 1 | 0 | -4.982582 | 0.334997  | 0.515226  |
| 66 | 1 | 0 | -3.946986 | -0.494700 | -2.232587 |
| 67 | 1 | 0 | -5.393270 | 0.491534  | -3.944781 |
| 68 | 1 | 0 | -5.737043 | 2.962138  | -4.050278 |
| 69 | 1 | 0 | -4.561073 | 4.430815  | -2.435456 |
| 70 | 1 | 0 | 2.534126  | 3.986163  | 2.135282  |
| 71 | 1 | 0 | 0.781773  | 3.754204  | 2.319873  |
| 72 | 1 | 0 | 1.407492  | 5.228640  | 1.546914  |
| 73 | 1 | 0 | -0.742745 | -0.514137 | 4.417917  |
| 74 | 1 | 0 | -0.368385 | 1.214089  | 4.311394  |
| 75 | 1 | 0 | 0.152686  | 0.277623  | 5.734870  |
| 76 | 1 | 0 | 2.546280  | 3.411192  | -1.607072 |
| 77 | 1 | 0 | 3.587423  | 3.817164  | -0.223188 |
| 78 | 1 | 0 | 2.451294  | 5.021793  | -0.864112 |
| 79 | 1 | 0 | 2.119979  | 1.941502  | 3.916886  |
| 80 | 1 | 0 | 3.357061  | 0.676205  | 3.722406  |
| 81 | 1 | 0 | 2.637801  | 0.979738  | 5.317416  |

E<sub>ZPE</sub>: B3LYP/6-31G\* = -2820.38813 (a.u.)

Gsol: B3LYP/6-311++G\*\*/(SMD,M06-2X/6-31G\*,CH2Cl2) = -2821.06054 (a.u.)

### Int<sub>13</sub>

Standard orientation:

| Center Number | Atomic Number | Atomic Type | Coordinates (Angstroms) |           |           |
|---------------|---------------|-------------|-------------------------|-----------|-----------|
|               |               |             | X                       | Y         | Z         |
| 1             | 6             | 0           | -2.022250               | -3.430289 | -0.460560 |
| 2             | 6             | 0           | -3.311996               | -2.996888 | -0.067501 |
| 3             | 6             | 0           | -3.551870               | -1.594649 | 0.122192  |
| 4             | 6             | 0           | -2.500108               | -0.646540 | -0.134709 |
| 5             | 6             | 0           | -1.225217               | -1.120797 | -0.441579 |
| 6             | 6             | 0           | -1.002291               | -2.525970 | -0.617512 |
| 7             | 6             | 0           | -2.743093               | 0.823033  | -0.029309 |
| 8             | 6             | 0           | -2.015761               | 1.601692  | 0.872634  |
| 9             | 6             | 0           | -2.349785               | 2.964122  | 1.098470  |
| 10            | 6             | 0           | -3.343471               | 3.570367  | 0.374392  |
| 11            | 6             | 0           | -3.729390               | 1.473485  | -0.851875 |
| 12            | 6             | 0           | -4.039669               | 2.858086  | -0.636739 |
| 13            | 1             | 0           | -1.833627               | -4.489017 | -0.617156 |
| 14            | 6             | 0           | -4.357714               | -3.930136 | 0.163436  |
| 15            | 6             | 0           | -4.837981               | -1.206251 | 0.594311  |
| 16            | 8             | 0           | -0.976748               | 1.088741  | 1.583774  |
| 17            | 1             | 0           | -1.794679               | 3.502915  | 1.859850  |
| 18            | 1             | 0           | -3.595631               | 4.612826  | 0.554172  |
| 19            | 6             | 0           | -5.020630               | 3.492732  | -1.443498 |
| 20            | 7             | 0           | 0.326429                | -2.972081 | -0.879000 |
| 21            | 7             | 0           | 2.432171                | -2.900808 | -1.608282 |
| 22            | 6             | 0           | 2.338319                | -3.804260 | -0.563766 |
| 23            | 6             | 0           | 1.053039                | -3.862953 | -0.098451 |
| 24            | 6             | 0           | 1.207233                | -2.433420 | -1.774226 |
| 25            | 1             | 0           | 3.203020                | -4.351677 | -0.214777 |
| 26            | 1             | 0           | 0.587481                | -4.413275 | 0.704292  |
| 27            | 1             | 0           | 0.911359                | -1.688884 | -2.498120 |
| 28            | 6             | 0           | -4.403398               | 0.805251  | -1.913690 |
| 29            | 8             | 0           | -0.173213               | -0.288985 | -0.587385 |
| 30            | 22            | 0           | 0.654961                | 0.600311  | 0.849630  |
| 31            | 8             | 0           | 1.202345                | -0.300936 | 2.287461  |
| 32            | 8             | 0           | 1.367961                | 2.232913  | 0.526143  |
| 33            | 6             | 0           | 0.799939                | -0.705774 | 3.592740  |
| 34            | 6             | 0           | 1.394862                | 3.541013  | 1.090951  |
| 35            | 6             | 0           | 1.817544                | -0.191320 | 4.609813  |
| 36            | 6             | 0           | 0.646926                | -2.225764 | 3.623914  |
| 37            | 1             | 0           | -0.178182               | -0.241432 | 3.786619  |
| 38            | 1             | 0           | 0.639300                | 3.581654  | 1.889519  |
| 39            | 6             | 0           | 1.023426                | 4.552756  | 0.007373  |
| 40            | 6             | 0           | 2.769039                | 3.808674  | 1.706565  |
| 41            | 1             | 0           | 2.644362                | -1.042767 | -0.542571 |
| 42            | 6             | 0           | 2.854437                | 0.665056  | -2.467692 |
| 43            | 7             | 0           | 2.399436                | 0.636162  | -3.535148 |

|    |   |   |           |           |           |
|----|---|---|-----------|-----------|-----------|
| 44 | 8 | 0 | 2.624787  | -0.115709 | -0.217991 |
| 45 | 6 | 0 | 3.424701  | 0.696229  | -1.102049 |
| 46 | 1 | 0 | 3.294323  | 1.707729  | -0.714016 |
| 47 | 6 | 0 | 4.890705  | 0.304141  | -1.080330 |
| 48 | 6 | 0 | 5.337795  | -0.860547 | -1.719298 |
| 49 | 6 | 0 | 5.801795  | 1.106568  | -0.385384 |
| 50 | 6 | 0 | 6.685581  | -1.212144 | -1.656910 |
| 51 | 1 | 0 | 4.631193  | -1.497475 | -2.245428 |
| 52 | 6 | 0 | 7.150305  | 0.753500  | -0.328187 |
| 53 | 1 | 0 | 5.455380  | 2.009314  | 0.112102  |
| 54 | 6 | 0 | 7.593488  | -0.406190 | -0.965598 |
| 55 | 1 | 0 | 7.027726  | -2.115962 | -2.153324 |
| 56 | 1 | 0 | 7.851976  | 1.384014  | 0.210865  |
| 57 | 1 | 0 | 8.643944  | -0.681514 | -0.924742 |
| 58 | 6 | 0 | -5.826286 | -2.136980 | 0.826957  |
| 59 | 6 | 0 | -5.594166 | -3.513490 | 0.597975  |
| 60 | 6 | 0 | -5.339310 | 1.453748  | -2.688953 |
| 61 | 6 | 0 | -5.664516 | 2.808945  | -2.448736 |
| 62 | 1 | 0 | -4.155290 | -4.986216 | 0.000240  |
| 63 | 1 | 0 | -6.385785 | -4.235685 | 0.777078  |
| 64 | 1 | 0 | -6.795153 | -1.809108 | 1.194022  |
| 65 | 1 | 0 | -5.033641 | -0.157557 | 0.782891  |
| 66 | 1 | 0 | -4.160182 | -0.230086 | -2.123100 |
| 67 | 1 | 0 | -5.828702 | 0.918338  | -3.498286 |
| 68 | 1 | 0 | -6.408975 | 3.306815  | -3.063871 |
| 69 | 1 | 0 | -5.245011 | 4.540440  | -1.255921 |
| 70 | 1 | 0 | 1.511804  | -0.456807 | 5.628489  |
| 71 | 1 | 0 | 2.804634  | -0.626885 | 4.418159  |
| 72 | 1 | 0 | 1.903717  | 0.898701  | 4.549311  |
| 73 | 1 | 0 | 0.314987  | -2.557778 | 4.614487  |
| 74 | 1 | 0 | -0.094080 | -2.550132 | 2.886054  |
| 75 | 1 | 0 | 1.602219  | -2.711709 | 3.395516  |
| 76 | 1 | 0 | 1.010567  | 5.569807  | 0.416984  |
| 77 | 1 | 0 | 1.749816  | 4.519760  | -0.812775 |
| 78 | 1 | 0 | 0.033188  | 4.327823  | -0.399616 |
| 79 | 1 | 0 | 3.018347  | 3.040185  | 2.445844  |
| 80 | 1 | 0 | 3.545978  | 3.809758  | 0.932119  |
| 81 | 1 | 0 | 2.785765  | 4.785727  | 2.203204  |

E<sub>ZPE</sub>: B3LYP/6-31G\* = -2820.40736 (a.u.)  
 Gsol: B3LYP/6-311++G\*\*/(SMD,M06-2X/6-31G\*,CH2Cl2) = -2821.07891 (a.u.)

#### Int<sub>14</sub>

Standard orientation:

| Center Number | Atomic Number | Atomic Type | Coordinates (Angstroms) |           |           |
|---------------|---------------|-------------|-------------------------|-----------|-----------|
|               |               |             | X                       | Y         | Z         |
| 1             | 6             | 0           | -2.172266               | -3.169150 | -1.250755 |
| 2             | 6             | 0           | -3.450318               | -2.733367 | -0.821841 |
| 3             | 6             | 0           | -3.601419               | -1.399550 | -0.312932 |
| 4             | 6             | 0           | -2.470358               | -0.510668 | -0.281886 |
| 5             | 6             | 0           | -1.215706               | -1.005119 | -0.635566 |
| 6             | 6             | 0           | -1.085408               | -2.339908 | -1.141895 |
| 7             | 6             | 0           | -2.606668               | 0.905984  | 0.166626  |
| 8             | 6             | 0           | -1.879602               | 1.372619  | 1.263955  |
| 9             | 6             | 0           | -2.112627               | 2.671551  | 1.792830  |
| 10            | 6             | 0           | -2.996369               | 3.526845  | 1.187354  |
| 11            | 6             | 0           | -3.475481               | 1.824215  | -0.521076 |
| 12            | 6             | 0           | -3.679573               | 3.144414  | 0.003441  |
| 13            | 1             | 0           | -2.048384               | -4.172644 | -1.649124 |
| 14            | 6             | 0           | -4.572998               | -3.602235 | -0.869339 |
| 15            | 6             | 0           | -4.885216               | -1.023762 | 0.175268  |
| 16            | 8             | 0           | -0.951683               | 0.600256  | 1.883500  |
| 17            | 1             | 0           | -1.571983               | 2.959208  | 2.688780  |
| 18            | 1             | 0           | -3.170629               | 4.517943  | 1.599736  |
| 19            | 6             | 0           | -4.544244               | 4.044170  | -0.673795 |
| 20            | 7             | 0           | 0.225281                | -2.802270 | -1.464329 |
| 21            | 7             | 0           | 2.349692                | -2.654242 | -2.133149 |
| 22            | 6             | 0           | 2.219647                | -3.704945 | -1.241430 |

|    |    |   |           |           |           |
|----|----|---|-----------|-----------|-----------|
| 23 | 6  | 0 | 0.923346  | -3.811364 | -0.812942 |
| 24 | 6  | 0 | 1.135289  | -2.148151 | -2.244950 |
| 25 | 1  | 0 | 3.068609  | -4.315838 | -0.966987 |
| 26 | 1  | 0 | 0.428452  | -4.476061 | -0.121522 |
| 27 | 1  | 0 | 0.859208  | -1.296738 | -2.849813 |
| 28 | 6  | 0 | -4.131422 | 1.491854  | -1.740779 |
| 29 | 8  | 0 | -0.095726 | -0.260742 | -0.527657 |
| 30 | 22 | 0 | 0.689710  | 0.144629  | 1.141630  |
| 31 | 8  | 0 | 1.168823  | -1.156600 | 2.227454  |
| 32 | 8  | 0 | 1.581896  | 1.714411  | 1.367635  |
| 33 | 6  | 0 | 1.518078  | -2.304877 | 2.984438  |
| 34 | 6  | 0 | 1.620697  | 2.731521  | 2.368552  |
| 35 | 6  | 0 | 2.714754  | -1.983936 | 3.878450  |
| 36 | 1  | 0 | 1.807259  | -3.082596 | 2.263333  |
| 37 | 6  | 0 | 0.292716  | -2.773735 | 3.769614  |
| 38 | 6  | 0 | 2.888580  | 2.582660  | 3.210568  |
| 39 | 1  | 0 | 0.747540  | 2.599529  | 3.023989  |
| 40 | 6  | 0 | 1.522283  | 4.095545  | 1.685973  |
| 41 | 6  | 0 | 4.837437  | -0.568795 | 0.506081  |
| 42 | 7  | 0 | 5.581999  | -1.298047 | 1.017144  |
| 43 | 8  | 0 | 2.574651  | -0.284188 | -0.179224 |
| 44 | 6  | 0 | 3.859579  | 0.350830  | -0.115898 |
| 45 | 1  | 0 | 3.698817  | 1.183504  | 0.573011  |
| 46 | 6  | 0 | 4.297422  | 0.880808  | -1.469717 |
| 47 | 6  | 0 | 3.696344  | 2.058448  | -1.935574 |
| 48 | 6  | 0 | 5.226571  | 0.212996  | -2.272644 |
| 49 | 6  | 0 | 4.026295  | 2.563497  | -3.191138 |
| 50 | 1  | 0 | 2.966090  | 2.567332  | -1.311250 |
| 51 | 6  | 0 | 5.557623  | 0.723164  | -3.529367 |
| 52 | 1  | 0 | 5.693905  | -0.701039 | -1.917635 |
| 53 | 6  | 0 | 4.960057  | 1.896657  | -3.989385 |
| 54 | 1  | 0 | 3.558465  | 3.477731  | -3.545726 |
| 55 | 1  | 0 | 6.281701  | 0.200200  | -4.147619 |
| 56 | 1  | 0 | 5.220183  | 2.292390  | -4.967386 |
| 57 | 1  | 0 | 2.568352  | -0.967167 | -0.886340 |
| 58 | 6  | 0 | -5.802646 | -3.194900 | -0.407258 |
| 59 | 6  | 0 | -5.950810 | -1.895332 | 0.131445  |
| 60 | 6  | 0 | -5.174745 | 3.681091  | -1.841574 |
| 61 | 6  | 0 | -4.953032 | 2.392962  | -2.381695 |
| 62 | 1  | 0 | -4.436366 | -4.604189 | -1.269754 |
| 63 | 1  | 0 | -6.653827 | -3.869057 | -0.442985 |
| 64 | 1  | 0 | -6.916178 | -1.581144 | 0.519090  |
| 65 | 1  | 0 | -5.017007 | -0.035030 | 0.598150  |
| 66 | 1  | 0 | -3.966440 | 0.513393  | -2.177148 |
| 67 | 1  | 0 | -5.432429 | 2.111223  | -3.315558 |
| 68 | 1  | 0 | -5.830309 | 4.380180  | -2.353452 |
| 69 | 1  | 0 | -4.690510 | 5.036322  | -0.252415 |
| 70 | 1  | 0 | 2.456164  | -1.190973 | 4.589968  |
| 71 | 1  | 0 | 3.569691  | -1.657308 | 3.278713  |
| 72 | 1  | 0 | 3.014327  | -2.872069 | 4.446742  |
| 73 | 1  | 0 | -0.545908 | -2.973164 | 3.094812  |
| 74 | 1  | 0 | -0.019279 | -2.005287 | 4.485381  |
| 75 | 1  | 0 | 0.522246  | -3.692003 | 4.322412  |
| 76 | 1  | 0 | 3.784169  | 2.740891  | 2.597440  |
| 77 | 1  | 0 | 2.944259  | 1.582212  | 3.652278  |
| 78 | 1  | 0 | 2.901006  | 3.318927  | 4.022632  |
| 79 | 1  | 0 | 0.604585  | 4.160267  | 1.093434  |
| 80 | 1  | 0 | 2.378943  | 4.253492  | 1.020050  |
| 81 | 1  | 0 | 1.514324  | 4.900322  | 2.430624  |

E<sub>ZPE</sub>: B3LYP/6-31G\* = -2820.40744 (a.u.)  
Gsol: B3LYP/6-311++G\*\*/(SMD,M06-2X/6-31G\*,CH2Cl2) = -2821.08010 (a.u.)

#### Int<sub>15</sub>

Standard orientation:

| Center<br>Number | Atomic<br>Number | Atomic<br>Type | Coordinates (Angstroms) |          |          |
|------------------|------------------|----------------|-------------------------|----------|----------|
|                  |                  |                | X                       | Y        | Z        |
| 1                | 6                | 0              | -3.476864               | 3.551429 | 0.551441 |

|    |    |   |           |           |           |
|----|----|---|-----------|-----------|-----------|
| 2  | 6  | 0 | -4.268024 | 2.792234  | -0.349742 |
| 3  | 6  | 0 | -2.395604 | 2.987538  | 1.177028  |
| 4  | 6  | 0 | -2.060895 | 1.623005  | 0.960186  |
| 5  | 6  | 0 | -2.877706 | 0.797087  | 0.185215  |
| 6  | 6  | 0 | -3.960852 | 1.404122  | -0.545855 |
| 7  | 6  | 0 | -2.637362 | -0.674376 | 0.115104  |
| 8  | 6  | 0 | -3.658222 | -1.611290 | 0.509479  |
| 9  | 6  | 0 | -1.407362 | -1.169408 | -0.319251 |
| 10 | 6  | 0 | -1.230258 | -2.579152 | -0.509138 |
| 11 | 6  | 0 | -2.225311 | -3.474049 | -0.217807 |
| 12 | 6  | 0 | -3.455181 | -3.019782 | 0.319948  |
| 13 | 1  | 0 | -3.728046 | 4.595387  | 0.723590  |
| 14 | 6  | 0 | -5.341245 | 3.384221  | -1.066432 |
| 15 | 1  | 0 | -1.770637 | 3.560593  | 1.854694  |
| 16 | 6  | 0 | -4.736663 | 0.688619  | -1.502276 |
| 17 | 6  | 0 | -4.877645 | -1.202439 | 1.121084  |
| 18 | 8  | 0 | -0.361926 | -0.367094 | -0.599034 |
| 19 | 1  | 0 | -2.059310 | -4.536260 | -0.375041 |
| 20 | 6  | 0 | -4.471662 | -3.938422 | 0.693704  |
| 21 | 7  | 0 | 0.034375  | -3.014066 | -1.019423 |
| 22 | 22 | 0 | 0.599884  | 0.580755  | 0.711625  |
| 23 | 7  | 0 | 2.260008  | -3.131715 | -1.079353 |
| 24 | 6  | 0 | 1.760861  | -3.184325 | -2.370116 |
| 25 | 6  | 0 | 0.395259  | -3.099350 | -2.354752 |
| 26 | 6  | 0 | 1.192875  | -3.034774 | -0.302872 |
| 27 | 1  | 0 | 2.417801  | -3.263053 | -3.224551 |
| 28 | 1  | 0 | -0.346259 | -3.078175 | -3.138325 |
| 29 | 1  | 0 | 1.196015  | -2.934035 | 0.773627  |
| 30 | 8  | 0 | 1.348128  | -0.359604 | 2.035287  |
| 31 | 8  | 0 | 1.366750  | 2.146226  | 0.236106  |
| 32 | 6  | 0 | 2.553893  | -0.596653 | 2.755310  |
| 33 | 6  | 0 | 1.166627  | 3.557384  | 0.296750  |
| 34 | 1  | 0 | 3.280639  | -1.012022 | 2.042351  |
| 35 | 6  | 0 | 3.102365  | 0.717454  | 3.310561  |
| 36 | 6  | 0 | 2.272633  | -1.625114 | 3.850199  |
| 37 | 6  | 0 | 2.495719  | 4.237411  | 0.626059  |
| 38 | 6  | 0 | 0.568713  | 4.042810  | -1.023257 |
| 39 | 1  | 0 | 0.456452  | 3.763648  | 1.109496  |
| 40 | 8  | 0 | -0.938203 | 1.155180  | 1.561085  |
| 41 | 1  | 0 | 2.515962  | -1.196974 | -0.703304 |
| 42 | 6  | 0 | 3.300810  | 0.190520  | -2.709159 |
| 43 | 7  | 0 | 3.186929  | -0.036912 | -3.841804 |
| 44 | 8  | 0 | 2.478435  | -0.232043 | -0.509082 |
| 45 | 6  | 0 | 3.465048  | 0.473062  | -1.264419 |
| 46 | 6  | 0 | 4.888181  | 0.183683  | -0.804691 |
| 47 | 6  | 0 | 5.349292  | -1.134356 | -0.679980 |
| 48 | 6  | 0 | 6.656403  | -1.375613 | -0.259017 |
| 49 | 6  | 0 | 7.512971  | -0.310396 | 0.031547  |
| 50 | 6  | 0 | 7.056595  | 1.001748  | -0.093905 |
| 51 | 6  | 0 | 5.746288  | 1.246798  | -0.508654 |
| 52 | 1  | 0 | 3.229452  | 1.527171  | -1.099943 |
| 53 | 1  | 0 | 4.689437  | -1.971087 | -0.899324 |
| 54 | 1  | 0 | 7.007870  | -2.399081 | -0.161545 |
| 55 | 1  | 0 | 8.531805  | -0.504103 | 0.355889  |
| 56 | 1  | 0 | 7.715766  | 1.834901  | 0.133834  |
| 57 | 1  | 0 | 5.390582  | 2.270143  | -0.603252 |
| 58 | 6  | 0 | -5.838161 | -2.118978 | 1.487705  |
| 59 | 6  | 0 | -5.645034 | -3.501994 | 1.262828  |
| 60 | 6  | 0 | -6.079591 | 2.655754  | -1.970202 |
| 61 | 6  | 0 | -5.760896 | 1.296438  | -2.194589 |
| 62 | 1  | 0 | -4.296378 | -4.999299 | 0.530491  |
| 63 | 1  | 0 | -6.414556 | -4.212817 | 1.550540  |
| 64 | 1  | 0 | -6.754149 | -1.774221 | 1.960030  |
| 65 | 1  | 0 | -5.042484 | -0.148668 | 1.310731  |
| 66 | 1  | 0 | -4.502604 | -0.351200 | -1.698953 |
| 67 | 1  | 0 | -6.326770 | 0.724842  | -2.925555 |
| 68 | 1  | 0 | -6.894190 | 3.121262  | -2.518125 |
| 69 | 1  | 0 | -5.560446 | 4.435533  | -0.893350 |
| 70 | 1  | 0 | 2.385057  | 1.164866  | 4.008513  |
| 71 | 1  | 0 | 3.286970  | 1.426642  | 2.497318  |

|    |   |   |           |           |           |
|----|---|---|-----------|-----------|-----------|
| 72 | 1 | 0 | 4.045879  | 0.548480  | 3.841892  |
| 73 | 1 | 0 | 1.871485  | -2.549707 | 3.421956  |
| 74 | 1 | 0 | 1.539813  | -1.232589 | 4.563805  |
| 75 | 1 | 0 | 3.193273  | -1.868637 | 4.392784  |
| 76 | 1 | 0 | 3.225806  | 4.069690  | -0.175075 |
| 77 | 1 | 0 | 2.910130  | 3.847409  | 1.561306  |
| 78 | 1 | 0 | 2.355625  | 5.318987  | 0.735572  |
| 79 | 1 | 0 | -0.391145 | 3.554307  | -1.215572 |
| 80 | 1 | 0 | 1.245257  | 3.817652  | -1.855751 |
| 81 | 1 | 0 | 0.403823  | 5.126283  | -0.995561 |

-----  
 E<sub>ZPE</sub>: B3LYP/6-31G\* = -2820.40621 (a.u.)  
 Gsol: B3LYP/6-311++G\*\*/(SMD,M06-2X/6-31G\*,CH2Cl2) = -2821.07903 (a.u.)

**Int<sub>16</sub>**

Standard orientation:

| Center<br>Number | Atomic<br>Number | Atomic<br>Type | Coordinates (Angstroms) |           |           |
|------------------|------------------|----------------|-------------------------|-----------|-----------|
|                  |                  |                | X                       | Y         | Z         |
| 1                | 6                | 0              | 2.075833                | -3.451276 | 0.213979  |
| 2                | 6                | 0              | 3.364157                | -2.939045 | -0.078042 |
| 3                | 6                | 0              | 3.532707                | -1.523346 | -0.243236 |
| 4                | 6                | 0              | 2.412088                | -0.636768 | -0.058172 |
| 5                | 6                | 0              | 1.147202                | -1.188112 | 0.146521  |
| 6                | 6                | 0              | 1.001033                | -2.606323 | 0.301500  |
| 7                | 6                | 0              | 2.592758                | 0.843859  | -0.110120 |
| 8                | 6                | 0              | 3.492450                | 1.513177  | 0.793890  |
| 9                | 6                | 0              | 3.771340                | 2.910586  | 0.622932  |
| 10               | 6                | 0              | 3.132046                | 3.615862  | -0.430177 |
| 11               | 6                | 0              | 1.901449                | 1.616651  | -1.045386 |
| 12               | 6                | 0              | 2.212965                | 2.990901  | -1.232373 |
| 13               | 1                | 0              | 1.931089                | -4.521259 | 0.335642  |
| 14               | 6                | 0              | 4.475003                | -3.808559 | -0.242437 |
| 15               | 6                | 0              | 4.824163                | -1.057732 | -0.621942 |
| 16               | 7                | 0              | -0.315067               | -3.106585 | 0.549927  |
| 17               | 6                | 0              | 4.106705                | 0.849686  | 1.894110  |
| 18               | 6                | 0              | 4.666507                | 3.563035  | 1.511265  |
| 19               | 1                | 0              | 3.367302                | 4.666838  | -0.580534 |
| 20               | 1                | 0              | 1.704870                | 3.521107  | -2.031640 |
| 21               | 8                | 0              | 0.930459                | 1.084807  | -1.831071 |
| 22               | 8                | 0              | 0.034149                | -0.430033 | 0.230779  |
| 23               | 22               | 0              | -0.717130               | 0.498235  | -1.231589 |
| 24               | 8                | 0              | -1.556285               | 2.052892  | -0.873223 |
| 25               | 8                | 0              | -1.250001               | -0.447422 | -2.646552 |
| 26               | 6                | 0              | -1.430585               | 3.473104  | -0.944626 |
| 27               | 6                | 0              | -2.307068               | -0.697847 | -3.572008 |
| 28               | 1                | 0              | -0.605117               | 3.702942  | -1.631992 |
| 29               | 6                | 0              | -2.634389               | 0.577062  | -4.348643 |
| 30               | 6                | 0              | -1.089551               | 4.018419  | 0.441740  |
| 31               | 6                | 0              | -2.720975               | 4.064545  | -1.511523 |
| 32               | 1                | 0              | -3.186471               | -0.996197 | -2.984341 |
| 33               | 6                | 0              | -1.892692               | -1.850165 | -4.486069 |
| 34               | 7                | 0              | -2.516299               | -3.249103 | 0.221234  |
| 35               | 6                | 0              | -2.235603               | -3.461786 | 1.559243  |
| 36               | 6                | 0              | -0.888560               | -3.366488 | 1.785843  |
| 37               | 6                | 0              | -1.340242               | -3.048330 | -0.345734 |
| 38               | 1                | 0              | -3.022411               | -3.664683 | 2.272204  |
| 39               | 1                | 0              | -0.285313               | -3.449840 | 2.676889  |
| 40               | 1                | 0              | -1.169194               | -2.813005 | -1.386745 |
| 41               | 1                | 0              | -2.872959               | -1.292033 | -0.077207 |
| 42               | 6                | 0              | -5.081151               | 0.216405  | -0.401868 |
| 43               | 7                | 0              | -6.060486               | 0.065315  | -1.006045 |
| 44               | 8                | 0              | -2.771512               | -0.329471 | -0.273224 |
| 45               | 6                | 0              | -3.816855               | 0.427267  | 0.338743  |
| 46               | 1                | 0              | -3.512413               | 1.464532  | 0.165329  |
| 47               | 6                | 0              | -3.946520               | 0.176294  | 1.838730  |
| 48               | 6                | 0              | -2.774926               | 0.043864  | 2.596085  |
| 49               | 6                | 0              | -5.190247               | 0.135812  | 2.476745  |
| 50               | 6                | 0              | -2.853679               | -0.120945 | 3.978511  |

|    |   |   |           |           |           |
|----|---|---|-----------|-----------|-----------|
| 51 | 1 | 0 | -1.809040 | 0.049304  | 2.100402  |
| 52 | 6 | 0 | -5.263026 | -0.027709 | 3.861426  |
| 53 | 1 | 0 | -6.103707 | 0.226918  | 1.895937  |
| 54 | 6 | 0 | -4.096246 | -0.154172 | 4.615427  |
| 55 | 1 | 0 | -1.940372 | -0.225042 | 4.558066  |
| 56 | 1 | 0 | -6.234465 | -0.061103 | 4.346956  |
| 57 | 1 | 0 | -4.154329 | -0.282170 | 5.692999  |
| 58 | 6 | 0 | 5.878711  | -1.927682 | -0.790210 |
| 59 | 6 | 0 | 5.712450  | -3.317464 | -0.586934 |
| 60 | 6 | 0 | 5.254853  | 2.883993  | 2.553174  |
| 61 | 6 | 0 | 4.958330  | 1.515088  | 2.748377  |
| 62 | 1 | 0 | 4.322066  | -4.876254 | -0.103144 |
| 63 | 1 | 0 | 6.554879  | -3.991019 | -0.716647 |
| 64 | 1 | 0 | 6.849439  | -1.540566 | -1.088130 |
| 65 | 1 | 0 | 4.971959  | 0.001748  | -0.792902 |
| 66 | 1 | 0 | 3.884955  | -0.197115 | 2.067161  |
| 67 | 1 | 0 | 5.403964  | 0.981849  | 3.584036  |
| 68 | 1 | 0 | 5.934093  | 3.395403  | 3.229595  |
| 69 | 1 | 0 | 4.870121  | 4.620185  | 1.355664  |
| 70 | 1 | 0 | -1.764874 | 0.904451  | -4.930239 |
| 71 | 1 | 0 | -2.919018 | 1.381772  | -3.662896 |
| 72 | 1 | 0 | -3.468935 | 0.403435  | -5.037040 |
| 73 | 1 | 0 | -0.150708 | 3.589275  | 0.804489  |
| 74 | 1 | 0 | -1.883957 | 3.773664  | 1.156310  |
| 75 | 1 | 0 | -0.979674 | 5.108634  | 0.409030  |
| 76 | 1 | 0 | -3.568478 | 3.863514  | -0.845737 |
| 77 | 1 | 0 | -2.945493 | 3.637768  | -2.494266 |
| 78 | 1 | 0 | -2.625880 | 5.150851  | -1.621990 |
| 79 | 1 | 0 | -1.668039 | -2.750309 | -3.904495 |
| 80 | 1 | 0 | -1.000330 | -1.579766 | -5.061395 |
| 81 | 1 | 0 | -2.700815 | -2.089724 | -5.186330 |

E<sub>ZPE</sub>: B3LYP/6-31G\* = -2820.40667 (a.u.)

Gsol: B3LYP/6-311++G\*\*/(SMD,M06-2X/6-31G\*,CH2Cl2) = -2821.07843 (a.u.)

### Direct C-C bond forming TS

#### TS<sub>s</sub>

Standard orientation:

| Center Number | Atomic Number | Atomic Type | Coordinates (Angstroms) |           |           |
|---------------|---------------|-------------|-------------------------|-----------|-----------|
|               |               |             | X                       | Y         | Z         |
| 1             | 6             | 0           | -4.586491               | 2.439974  | -0.273860 |
| 2             | 7             | 0           | -5.229948               | 3.391200  | -0.018116 |
| 3             | 1             | 0           | -3.156898               | 3.241397  | -0.966135 |
| 4             | 6             | 0           | 2.424158                | 3.298168  | -0.946782 |
| 5             | 6             | 0           | 3.687280                | 2.730482  | -0.667072 |
| 6             | 6             | 0           | 3.760534                | 1.352407  | -0.273347 |
| 7             | 6             | 0           | 2.573001                | 0.542227  | -0.271991 |
| 8             | 6             | 0           | 1.334476                | 1.141161  | -0.522047 |
| 9             | 6             | 0           | 1.282604                | 2.543323  | -0.825572 |
| 10            | 6             | 0           | 2.635280                | -0.911407 | 0.059129  |
| 11            | 6             | 0           | 3.457384                | -1.824565 | -0.690375 |
| 12            | 6             | 0           | 3.613038                | -3.177486 | -0.238167 |
| 13            | 6             | 0           | 2.926484                | -3.594742 | 0.933516  |
| 14            | 6             | 0           | 1.890729                | -1.407136 | 1.131935  |
| 15            | 6             | 0           | 2.076875                | -2.741844 | 1.588023  |
| 16            | 1             | 0           | 2.365889                | 4.345063  | -1.231263 |
| 17            | 6             | 0           | 4.869038                | 3.518585  | -0.721421 |
| 18            | 6             | 0           | 5.035465                | 0.854137  | 0.122889  |
| 19            | 7             | 0           | 0.006434                | 3.195068  | -0.898436 |
| 20            | 6             | 0           | 4.108547                | -1.456296 | -1.901801 |
| 21            | 6             | 0           | 4.432608                | -4.073745 | -0.972844 |
| 22            | 1             | 0           | 3.067886                | -4.611956 | 1.291721  |
| 23            | 1             | 0           | 1.522318                | -3.056588 | 2.466720  |
| 24            | 8             | 0           | 0.972274                | -0.641926 | 1.773756  |
| 25            | 8             | 0           | 0.187160                | 0.457231  | -0.517556 |
| 26            | 22            | 0           | -0.704402               | -0.458221 | 0.918920  |
| 27            | 8             | 0           | -1.100411               | -2.182933 | 0.704133  |

|    |   |   |           |           |           |
|----|---|---|-----------|-----------|-----------|
| 28 | 8 | 0 | -1.509931 | 0.369398  | 2.265209  |
| 29 | 6 | 0 | -1.547852 | -3.416430 | 1.247359  |
| 30 | 6 | 0 | -1.519681 | 1.058502  | 3.511364  |
| 31 | 1 | 0 | -2.527991 | 1.480165  | 3.624077  |
| 32 | 6 | 0 | -3.008973 | -3.299011 | 1.683498  |
| 33 | 7 | 0 | -2.139442 | 3.531801  | -1.039965 |
| 34 | 6 | 0 | -1.596878 | 4.680268  | -0.509985 |
| 35 | 6 | 0 | -0.252243 | 4.483910  | -0.427319 |
| 36 | 6 | 0 | -1.171055 | 2.647412  | -1.259777 |
| 37 | 1 | 0 | -2.213190 | 5.516602  | -0.220708 |
| 38 | 1 | 0 | 0.535003  | 5.113157  | -0.048231 |
| 39 | 1 | 0 | -1.310881 | 1.637691  | -1.602288 |
| 40 | 6 | 0 | -1.258554 | 0.063036  | 4.641750  |
| 41 | 6 | 0 | -0.500212 | 2.196995  | 3.475112  |
| 42 | 6 | 0 | -1.323127 | -4.514728 | 0.208873  |
| 43 | 1 | 0 | -0.928565 | -3.632382 | 2.131295  |
| 44 | 8 | 0 | -2.437750 | -0.038861 | -0.400944 |
| 45 | 6 | 0 | -3.659426 | -0.006757 | -0.148689 |
| 46 | 6 | 0 | -4.661091 | -0.519522 | -1.097035 |
| 47 | 6 | 0 | -6.022102 | -0.492622 | -0.755628 |
| 48 | 6 | 0 | -4.256107 | -1.109605 | -2.303927 |
| 49 | 6 | 0 | -6.966753 | -1.046639 | -1.613135 |
| 50 | 1 | 0 | -6.330036 | -0.003812 | 0.164269  |
| 51 | 6 | 0 | -5.204726 | -1.660668 | -3.161629 |
| 52 | 1 | 0 | -3.198759 | -1.135336 | -2.547941 |
| 53 | 6 | 0 | -6.559066 | -1.630004 | -2.817331 |
| 54 | 1 | 0 | -8.020535 | -1.016880 | -1.351332 |
| 55 | 1 | 0 | -4.890808 | -2.117485 | -4.096176 |
| 56 | 1 | 0 | -7.298475 | -2.060002 | -3.487898 |
| 57 | 1 | 0 | -3.997127 | 0.217364  | 0.867760  |
| 58 | 6 | 0 | 6.085331  | 2.990961  | -0.359926 |
| 59 | 6 | 0 | 6.159156  | 1.648498  | 0.082639  |
| 60 | 6 | 0 | 4.883974  | -2.355104 | -2.601535 |
| 61 | 6 | 0 | 5.061906  | -3.676338 | -2.130526 |
| 62 | 1 | 0 | 4.787604  | 4.555593  | -1.039464 |
| 63 | 1 | 0 | 6.982804  | 3.601949  | -0.396575 |
| 64 | 1 | 0 | 7.114988  | 1.239548  | 0.398794  |
| 65 | 1 | 0 | 5.114424  | -0.168210 | 0.470901  |
| 66 | 1 | 0 | 3.975733  | -0.451044 | -2.285708 |
| 67 | 1 | 0 | 5.360017  | -2.045336 | -3.528270 |
| 68 | 1 | 0 | 5.681866  | -4.373658 | -2.687257 |
| 69 | 1 | 0 | 4.544042  | -5.091622 | -0.605498 |
| 70 | 1 | 0 | -3.652756 | -3.097232 | 0.819954  |
| 71 | 1 | 0 | -3.129889 | -2.484215 | 2.405691  |
| 72 | 1 | 0 | -3.346119 | -4.229668 | 2.154268  |
| 73 | 1 | 0 | -0.267006 | -0.387208 | 4.526570  |
| 74 | 1 | 0 | -2.008600 | -0.734946 | 4.631296  |
| 75 | 1 | 0 | -1.306142 | 0.565862  | 5.614529  |
| 76 | 1 | 0 | -0.731666 | 2.889965  | 2.658870  |
| 77 | 1 | 0 | 0.507255  | 1.795866  | 3.321275  |
| 78 | 1 | 0 | -0.516541 | 2.758813  | 4.416058  |
| 79 | 1 | 0 | -0.268948 | -4.549789 | -0.081772 |
| 80 | 1 | 0 | -1.924355 | -4.320868 | -0.686378 |
| 81 | 1 | 0 | -1.608917 | -5.492063 | 0.615273  |

E<sub>ZPE</sub>: B3LYP/6-31G\* = -2820.366844 (a.u.)

Gsol: B3LYP/6-311++G\*\*/(SMD,M06-2X/6-31G\*,CH2Cl2) = -2821.05512 (a.u.)

### TS<sub>R</sub>

Standard orientation:

| Center<br>Number | Atomic<br>Number | Atomic<br>Type | Coordinates (Angstroms) |           |           |
|------------------|------------------|----------------|-------------------------|-----------|-----------|
|                  |                  |                | X                       | Y         | Z         |
| 1                | 8                | 0              | 2.438383                | -0.053209 | -0.369194 |
| 2                | 6                | 0              | 3.444892                | 0.416475  | -0.964238 |
| 3                | 1                | 0              | 3.342931                | 1.353671  | -1.519622 |
| 4                | 6                | 0              | 4.814268                | 0.034793  | -0.541177 |
| 5                | 6                | 0              | 5.932963                | 0.593324  | -1.176768 |
| 6                | 6                | 0              | 4.992194                | -0.821418 | 0.554030  |

|    |    |   |           |           |           |
|----|----|---|-----------|-----------|-----------|
| 7  | 6  | 0 | 7.214392  | 0.292906  | -0.725605 |
| 8  | 1  | 0 | 5.788469  | 1.231630  | -2.044050 |
| 9  | 6  | 0 | 6.277899  | -1.122083 | 1.002294  |
| 10 | 1  | 0 | 4.115640  | -1.222543 | 1.052978  |
| 11 | 6  | 0 | 7.389283  | -0.567036 | 0.363918  |
| 12 | 1  | 0 | 8.078495  | 0.722344  | -1.224798 |
| 13 | 1  | 0 | 6.413969  | -1.781844 | 1.855318  |
| 14 | 1  | 0 | 8.390995  | -0.800881 | 0.714957  |
| 15 | 6  | 0 | 3.593757  | -0.452593 | -3.097027 |
| 16 | 7  | 0 | 3.837027  | -0.235310 | -4.224608 |
| 17 | 7  | 0 | 0.394724  | -2.857768 | -1.025968 |
| 18 | 7  | 0 | 2.323005  | -2.696682 | -2.015342 |
| 19 | 6  | 0 | 1.110658  | -2.163842 | -1.925586 |
| 20 | 6  | 0 | -1.813013 | -3.487848 | -0.219617 |
| 21 | 6  | 0 | -3.070491 | -3.134648 | 0.324466  |
| 22 | 6  | 0 | -3.413532 | -1.745460 | 0.451428  |
| 23 | 6  | 0 | -2.503384 | -0.733131 | -0.008474 |
| 24 | 6  | 0 | -1.230996 | -1.112546 | -0.440646 |
| 25 | 6  | 0 | -0.916653 | -2.506589 | -0.563296 |
| 26 | 6  | 0 | -2.870316 | 0.713319  | -0.018565 |
| 27 | 6  | 0 | -4.006471 | 1.186328  | -0.765824 |
| 28 | 6  | 0 | -4.392326 | 2.566068  | -0.678495 |
| 29 | 6  | 0 | -3.619887 | 3.446920  | 0.123562  |
| 30 | 6  | 0 | -2.088134 | 1.642044  | 0.674049  |
| 31 | 6  | 0 | -2.495112 | 3.002875  | 0.767686  |
| 32 | 1  | 0 | -1.563676 | -4.537054 | -0.354997 |
| 33 | 6  | 0 | -3.986866 | -4.131902 | 0.754948  |
| 34 | 6  | 0 | -4.660932 | -1.430542 | 1.062689  |
| 35 | 6  | 0 | -4.763269 | 0.348610  | -1.634411 |
| 36 | 6  | 0 | -5.519996 | 3.029707  | -1.405264 |
| 37 | 1  | 0 | -3.923819 | 4.488123  | 0.204003  |
| 38 | 1  | 0 | -1.885186 | 3.671423  | 1.367442  |
| 39 | 8  | 0 | -0.949094 | 1.287544  | 1.300583  |
| 40 | 8  | 0 | -0.291486 | -0.220517 | -0.777757 |
| 41 | 22 | 0 | 0.698662  | 0.823956  | 0.502730  |
| 42 | 8  | 0 | 1.202361  | 2.440547  | -0.081389 |
| 43 | 8  | 0 | 1.321856  | 0.292009  | 2.101131  |
| 44 | 6  | 0 | 1.274531  | 3.810526  | 0.297053  |
| 45 | 6  | 0 | 0.920985  | 0.272311  | 3.465484  |
| 46 | 1  | 0 | -0.116755 | 0.632787  | 3.506237  |
| 47 | 1  | 0 | 0.620485  | 3.953103  | 1.170643  |
| 48 | 6  | 0 | 2.420939  | -3.753822 | -1.135291 |
| 49 | 6  | 0 | 1.210691  | -3.867741 | -0.518639 |
| 50 | 1  | 0 | 3.326722  | -4.327266 | -1.021213 |
| 51 | 1  | 0 | 0.859389  | -4.545866 | 0.241507  |
| 52 | 1  | 0 | 0.784578  | -1.283952 | -2.450573 |
| 53 | 1  | 0 | 3.063252  | -2.123130 | -2.494253 |
| 54 | 6  | 0 | 0.973430  | -1.166462 | 3.979842  |
| 55 | 6  | 0 | 1.816974  | 1.216793  | 4.266965  |
| 56 | 6  | 0 | 2.710553  | 4.155492  | 0.692381  |
| 57 | 6  | 0 | 0.753505  | 4.662816  | -0.859328 |
| 58 | 1  | 0 | 1.996392  | -1.557201 | 3.926809  |
| 59 | 1  | 0 | 0.323538  | -1.810909 | 3.378350  |
| 60 | 1  | 0 | 0.637459  | -1.216559 | 5.022203  |
| 61 | 1  | 0 | 1.755730  | 2.234107  | 3.866137  |
| 62 | 1  | 0 | 2.862048  | 0.889851  | 4.218783  |
| 63 | 1  | 0 | 1.509098  | 1.242444  | 5.318953  |
| 64 | 1  | 0 | 3.385692  | 4.019819  | -0.160346 |
| 65 | 1  | 0 | 3.051683  | 3.509873  | 1.508628  |
| 66 | 1  | 0 | 2.779800  | 5.198165  | 1.023620  |
| 67 | 1  | 0 | -0.275780 | 4.383308  | -1.103882 |
| 68 | 1  | 0 | 1.373613  | 4.514335  | -1.750433 |
| 69 | 1  | 0 | 0.774243  | 5.726503  | -0.594087 |
| 70 | 6  | 0 | -5.518887 | -2.419684 | 1.488019  |
| 71 | 6  | 0 | -5.189999 | -3.786552 | 1.323140  |
| 72 | 6  | 0 | -6.240462 | 2.184344  | -2.217562 |
| 73 | 6  | 0 | -5.844423 | 0.832590  | -2.338313 |
| 74 | 1  | 0 | -3.710859 | -5.177283 | 0.636154  |
| 75 | 1  | 0 | -5.881445 | -4.555730 | 1.655364  |
| 76 | 1  | 0 | -6.459564 | -2.147197 | 1.958802  |



|    |   |   |           |           |           |
|----|---|---|-----------|-----------|-----------|
| 77 | 1 | 0 | -4.926814 | -0.389398 | 1.201061  |
| 78 | 1 | 0 | -4.470922 | -0.688160 | -1.754991 |
| 79 | 1 | 0 | -6.394648 | 0.167506  | -2.998937 |
| 80 | 1 | 0 | -7.098344 | 2.552428  | -2.773475 |
| 81 | 1 | 0 | -5.797001 | 4.077808  | -1.314884 |

E<sub>ZPE</sub>: B3LYP/6-31G\* = -2820.36693 (a.u.)  
Gsol: B3LYP/6-311++G\*\*/(SMD,M06-2X/6-31G\*,CH2Cl2) = -2821.05711 (a.u.)

**Species involved in the Ti-HCN mechanism**

**Int<sub>17</sub>**

Z-Matrix orientation:

| Center Number | Atomic Number | Atomic Type | Coordinates (Angstroms) |           |           |
|---------------|---------------|-------------|-------------------------|-----------|-----------|
|               |               |             | X                       | Y         | Z         |
| 1             | 6             | 0           | -0.303618               | 3.588899  | -0.078156 |
| 2             | 6             | 0           | 0.909377                | 3.687875  | 0.643346  |
| 3             | 6             | 0           | 1.702776                | 2.508464  | 0.834446  |
| 4             | 6             | 0           | 1.269852                | 1.255426  | 0.278405  |
| 5             | 6             | 0           | 0.014892                | 1.178343  | -0.333200 |
| 6             | 6             | 0           | -0.749605               | 2.374031  | -0.538980 |
| 7             | 6             | 0           | 2.128845                | 0.038125  | 0.384054  |
| 8             | 6             | 0           | 3.439699                | -0.007018 | -0.207774 |
| 9             | 6             | 0           | 4.278452                | -1.151533 | 0.009061  |
| 10            | 6             | 0           | 3.783680                | -2.234682 | 0.783718  |
| 11            | 6             | 0           | 2.507090                | -2.213994 | 1.281240  |
| 12            | 6             | 0           | 1.667693                | -1.089684 | 1.060615  |
| 13            | 6             | 0           | 2.892484                | 2.634900  | 1.607941  |
| 14            | 6             | 0           | 3.281865                | 3.849059  | 2.128222  |
| 15            | 6             | 0           | 2.511240                | 5.014525  | 1.904685  |
| 16            | 6             | 0           | 1.346426                | 4.929065  | 1.178800  |
| 17            | 6             | 0           | 3.944218                | 1.033019  | -1.039101 |
| 18            | 6             | 0           | 5.202243                | 0.958689  | -1.596050 |
| 19            | 6             | 0           | 6.035675                | -0.157351 | -1.352436 |
| 20            | 6             | 0           | 5.575228                | -1.189604 | -0.567437 |
| 21            | 1             | 0           | -0.892427               | 4.482940  | -0.265010 |
| 22            | 1             | 0           | 0.733204                | 5.811395  | 1.009751  |
| 23            | 1             | 0           | 2.834777                | 5.967285  | 2.314599  |
| 24            | 1             | 0           | 4.190651                | 3.911345  | 2.720919  |
| 25            | 1             | 0           | 3.492448                | 1.752688  | 1.796663  |
| 26            | 1             | 0           | 3.316940                | 1.893009  | -1.244399 |
| 27            | 1             | 0           | 5.555763                | 1.765687  | -2.232614 |
| 28            | 1             | 0           | 7.028329                | -0.201158 | -1.792235 |
| 29            | 1             | 0           | 6.197114                | -2.062968 | -0.383216 |
| 30            | 1             | 0           | 4.427695                | -3.093703 | 0.957567  |
| 31            | 1             | 0           | 2.101404                | -3.046190 | 1.847921  |
| 32            | 7             | 0           | -2.004687               | 2.295675  | -1.212288 |
| 33            | 8             | 0           | -0.502130               | 0.010345  | -0.760298 |
| 34            | 8             | 0           | 0.394439                | -1.144172 | 1.538645  |
| 35            | 22            | 0           | -0.957420               | -1.480050 | 0.309222  |
| 36            | 8             | 0           | -0.499788               | -3.059629 | -0.384752 |
| 37            | 8             | 0           | -2.326364               | -1.443274 | 1.438124  |
| 38            | 6             | 0           | -3.212040               | 2.816250  | -0.769706 |
| 39            | 6             | 0           | -4.131858               | 2.492018  | -1.732510 |
| 40            | 7             | 0           | -3.531444               | 1.791268  | -2.759658 |
| 41            | 6             | 0           | -2.261152               | 1.699160  | -2.414990 |
| 42            | 1             | 0           | -3.285205               | 3.340722  | 0.170588  |
| 43            | 1             | 0           | -5.188824               | 2.721643  | -1.748894 |
| 44            | 1             | 0           | -1.483648               | 1.201531  | -2.975582 |
| 45            | 6             | 0           | -2.990572               | -1.050172 | 2.630928  |
| 46            | 6             | 0           | -2.381714               | -1.801102 | 3.815430  |
| 47            | 6             | 0           | -2.916431               | 0.468637  | 2.789021  |
| 48            | 1             | 0           | -4.043034               | -1.348191 | 2.516124  |
| 49            | 6             | 0           | -0.905733               | -4.373478 | -0.737619 |
| 50            | 6             | 0           | 0.187413                | -5.001212 | -1.602341 |
| 51            | 6             | 0           | -1.204559               | -5.185767 | 0.522991  |
| 52            | 1             | 0           | -1.827100               | -4.284559 | -1.332638 |
| 53            | 1             | 0           | -1.322284               | -1.544577 | 3.918885  |

|    |   |   |           |           |           |
|----|---|---|-----------|-----------|-----------|
| 54 | 1 | 0 | -2.901538 | -1.540184 | 4.744610  |
| 55 | 1 | 0 | -2.463235 | -2.882818 | 3.666187  |
| 56 | 1 | 0 | -3.477792 | 0.791962  | 3.673346  |
| 57 | 1 | 0 | -1.874222 | 0.787280  | 2.902556  |
| 58 | 1 | 0 | -3.340077 | 0.965437  | 1.909586  |
| 59 | 1 | 0 | -0.110788 | -6.002614 | -1.934316 |
| 60 | 1 | 0 | 0.377637  | -4.383247 | -2.485444 |
| 61 | 1 | 0 | 1.120868  | -5.084119 | -1.034816 |
| 62 | 1 | 0 | -0.302803 | -5.279356 | 1.139006  |
| 63 | 1 | 0 | -1.981569 | -4.695652 | 1.119285  |
| 64 | 1 | 0 | -1.551886 | -6.192231 | 0.262091  |
| 65 | 1 | 0 | -4.102367 | -0.580472 | -2.874176 |
| 66 | 7 | 0 | -2.761719 | -1.571836 | -1.400262 |
| 67 | 6 | 0 | -3.483400 | -1.110120 | -2.173342 |

-----  
 Ezpe: B3LYP/6-31G\* = -2474.93088 (a.u.)  
 Gsol: B3LYP/6-311++G\*\*/(SMD,M06-2X/6-31G\*,CH2Cl2) = -2475.49586 (a.u.)

**Int<sub>18</sub>**

Standard orientation:

| Center<br>Number | Atomic<br>Number | Atomic<br>Type | Coordinates (Angstroms) |           |           |
|------------------|------------------|----------------|-------------------------|-----------|-----------|
|                  |                  |                | X                       | Y         | Z         |
| 1                | 6                | 0              | 1.430142                | 3.391020  | -0.127031 |
| 2                | 6                | 0              | 2.542591                | 2.822540  | 0.536343  |
| 3                | 6                | 0              | 2.587085                | 1.401754  | 0.723395  |
| 4                | 6                | 0              | 1.530111                | 0.576129  | 0.204216  |
| 5                | 6                | 0              | 0.404689                | 1.183509  | -0.362127 |
| 6                | 6                | 0              | 0.386572                | 2.605429  | -0.551836 |
| 7                | 6                | 0              | 1.631556                | -0.912354 | 0.280955  |
| 8                | 6                | 0              | 2.703154                | -1.622149 | -0.368012 |
| 9                | 6                | 0              | 2.839527                | -3.037620 | -0.172701 |
| 10               | 6                | 0              | 1.891800                | -3.719043 | 0.637663  |
| 11               | 6                | 0              | 0.831404                | -3.048698 | 1.188312  |
| 12               | 6                | 0              | 0.683943                | -1.650371 | 0.987879  |
| 13               | 6                | 0              | 3.685807                | 0.869975  | 1.457724  |
| 14               | 6                | 0              | 4.682155                | 1.685875  | 1.945699  |
| 15               | 6                | 0              | 4.647063                | 3.083487  | 1.727549  |
| 16               | 6                | 0              | 3.593007                | 3.636309  | 1.038957  |
| 17               | 6                | 0              | 3.632635                | -0.983423 | -1.236838 |
| 18               | 6                | 0              | 4.644228                | -1.690786 | -1.849027 |
| 19               | 6                | 0              | 4.792869                | -3.079016 | -1.625815 |
| 20               | 6                | 0              | 3.902648                | -3.733605 | -0.805486 |
| 21               | 1                | 0              | 1.384032                | 4.466277  | -0.277326 |
| 22               | 1                | 0              | 3.539296                | 4.710561  | 0.877407  |
| 23               | 1                | 0              | 5.443235                | 3.714178  | 2.113231  |
| 24               | 1                | 0              | 5.502914                | 1.250565  | 2.509555  |
| 25               | 1                | 0              | 3.726312                | -0.196570 | 1.644141  |
| 26               | 1                | 0              | 3.529687                | 0.078649  | -1.427847 |
| 27               | 1                | 0              | 5.332752                | -1.175792 | -2.513901 |
| 28               | 1                | 0              | 5.599011                | -3.624431 | -2.108855 |
| 29               | 1                | 0              | 3.992384                | -4.804450 | -0.636291 |
| 30               | 1                | 0              | 2.008727                | -4.788557 | 0.796792  |
| 31               | 1                | 0              | 0.079842                | -3.558194 | 1.783058  |
| 32               | 7                | 0              | -0.707473               | 3.213535  | -1.237929 |
| 33               | 8                | 0              | -0.661049               | 0.471167  | -0.776434 |
| 34               | 8                | 0              | -0.418106               | -1.044862 | 1.515364  |
| 35               | 22               | 0              | -1.742291               | -0.644951 | 0.283802  |
| 36               | 8                | 0              | -2.159639               | -2.233355 | -0.389982 |
| 37               | 8                | 0              | -2.910517               | 0.176445  | 1.337899  |
| 38               | 6                | 0              | -0.627062               | 3.954426  | -2.407477 |
| 39               | 6                | 0              | -1.916585               | 4.295403  | -2.720416 |
| 40               | 7                | 0              | -2.792459               | 3.789994  | -1.780776 |
| 41               | 6                | 0              | -2.031858               | 3.153846  | -0.910394 |
| 42               | 1                | 0              | 0.320963                | 4.137473  | -2.889422 |
| 43               | 1                | 0              | -2.267029               | 4.874754  | -3.564025 |
| 44               | 1                | 0              | -2.376184               | 2.616463  | -0.038602 |
| 45               | 6                | 0              | -3.737573               | 0.514351  | 2.438503  |
| 46               | 6                | 0              | -4.357934               | -0.754050 | 3.024767  |

|    |   |   |           |           |           |
|----|---|---|-----------|-----------|-----------|
| 47 | 6 | 0 | -2.918931 | 1.301517  | 3.462256  |
| 48 | 1 | 0 | -4.540532 | 1.156937  | 2.047243  |
| 49 | 6 | 0 | -2.876437 | -3.156388 | -1.192507 |
| 50 | 6 | 0 | -1.914775 | -3.791517 | -2.197067 |
| 51 | 6 | 0 | -3.558197 | -4.185457 | -0.290540 |
| 52 | 1 | 0 | -3.643879 | -2.587819 | -1.736776 |
| 53 | 1 | 0 | -3.574688 | -1.412023 | 3.418084  |
| 54 | 1 | 0 | -5.045221 | -0.505472 | 3.841587  |
| 55 | 1 | 0 | -4.916668 | -1.298669 | 2.256492  |
| 56 | 1 | 0 | -3.548629 | 1.605920  | 4.306300  |
| 57 | 1 | 0 | -2.095416 | 0.687173  | 3.841718  |
| 58 | 1 | 0 | -2.494247 | 2.202328  | 3.007277  |
| 59 | 1 | 0 | -2.447594 | -4.494136 | -2.848504 |
| 60 | 1 | 0 | -1.451403 | -3.021384 | -2.821808 |
| 61 | 1 | 0 | -1.119311 | -4.332906 | -1.673354 |
| 62 | 1 | 0 | -2.810700 | -4.760392 | 0.267776  |
| 63 | 1 | 0 | -4.218993 | -3.689038 | 0.427794  |
| 64 | 1 | 0 | -4.157485 | -4.883076 | -0.887010 |
| 65 | 1 | 0 | -4.303422 | 1.995319  | -2.410890 |
| 66 | 7 | 0 | -3.475950 | 0.119754  | -1.542907 |
| 67 | 6 | 0 | -3.952249 | 1.056754  | -2.022106 |

-----  
 EzPE: B3LYP/6-31G\* = -24747.92921 (a.u.)  
 Gsol: B3LYP/6-311++G\*\*/(SMD,M06-2X/6-31G\*,CH2Cl2) = -2475.49346 (a.u.)

**TS<sub>11</sub>**

Standard orientation:

| Center<br>Number | Atomic<br>Number | Atomic<br>Type | Coordinates (Angstroms) |           |           |
|------------------|------------------|----------------|-------------------------|-----------|-----------|
|                  |                  |                | X                       | Y         | Z         |
| 1                | 6                | 0              | -1.350670               | -3.483000 | -0.391657 |
| 2                | 6                | 0              | -2.493630               | -3.031123 | 0.308118  |
| 3                | 6                | 0              | -2.621093               | -1.631215 | 0.600848  |
| 4                | 6                | 0              | -1.623568               | -0.699776 | 0.146683  |
| 5                | 6                | 0              | -0.457293               | -1.188403 | -0.452175 |
| 6                | 6                | 0              | -0.362759               | -2.596294 | -0.735349 |
| 7                | 6                | 0              | -1.801086               | 0.770384  | 0.335614  |
| 8                | 6                | 0              | -2.927738               | 1.469883  | -0.224358 |
| 9                | 6                | 0              | -3.119247               | 2.860984  | 0.074374  |
| 10               | 6                | 0              | -2.168759               | 3.529031  | 0.892522  |
| 11               | 6                | 0              | -1.056943               | 2.874446  | 1.352719  |
| 12               | 6                | 0              | -0.851598               | 1.499541  | 1.052722  |
| 13               | 6                | 0              | -3.749229               | -1.225634 | 1.370959  |
| 14               | 6                | 0              | -4.695290               | -2.133860 | 1.789955  |
| 15               | 6                | 0              | -4.581434               | -3.505774 | 1.461374  |
| 16               | 6                | 0              | -3.497038               | -3.940971 | 0.737341  |
| 17               | 6                | 0              | -3.861864               | 0.852126  | -1.104119 |
| 18               | 6                | 0              | -4.928209               | 1.551558  | -1.626283 |
| 19               | 6                | 0              | -5.130591               | 2.911817  | -1.298460 |
| 20               | 6                | 0              | -4.236973               | 3.547963  | -0.467099 |
| 21               | 1                | 0              | -1.250412               | -4.536479 | -0.640350 |
| 22               | 1                | 0              | -3.382041               | -4.994236 | 0.491034  |
| 23               | 1                | 0              | -5.340501               | -4.209286 | 1.791718  |
| 24               | 1                | 0              | -5.538151               | -1.792592 | 2.384985  |
| 25               | 1                | 0              | -3.850380               | -0.181347 | 1.640273  |
| 26               | 1                | 0              | -3.719888               | -0.187380 | -1.377384 |
| 27               | 1                | 0              | -5.618431               | 1.051937  | -2.301290 |
| 28               | 1                | 0              | -5.978985               | 3.451097  | -1.710909 |
| 29               | 1                | 0              | -4.366478               | 4.599207  | -0.218716 |
| 30               | 1                | 0              | -2.325999               | 4.578939  | 1.129508  |
| 31               | 1                | 0              | -0.302559               | 3.378011  | 1.948625  |
| 32               | 7                | 0              | 0.852527                | -3.066298 | -1.333269 |
| 33               | 8                | 0              | 0.566050                | -0.403982 | -0.811843 |
| 34               | 8                | 0              | 0.289228                | 0.920009  | 1.490488  |
| 35               | 22               | 0              | 1.707228                | 0.696724  | 0.291222  |
| 36               | 8                | 0              | 1.964055                | 2.390870  | -0.189189 |
| 37               | 8                | 0              | 2.859086                | -0.080956 | 1.400904  |
| 38               | 6                | 0              | 1.722710                | -4.022114 | -0.808502 |
| 39               | 6                | 0              | 2.901489                | -3.885004 | -1.480424 |

|    |   |   |          |           |           |
|----|---|---|----------|-----------|-----------|
| 40 | 7 | 0 | 2.763082 | -2.870924 | -2.417092 |
| 41 | 6 | 0 | 1.519610 | -2.410514 | -2.297027 |
| 42 | 1 | 0 | 1.417202 | -4.677578 | -0.008569 |
| 43 | 1 | 0 | 3.827214 | -4.427907 | -1.364862 |
| 44 | 1 | 0 | 1.128820 | -1.550687 | -2.813346 |
| 45 | 6 | 0 | 4.195286 | -0.313594 | 1.816399  |
| 46 | 6 | 0 | 4.607005 | 0.753344  | 2.831147  |
| 47 | 6 | 0 | 4.292283 | -1.732326 | 2.378166  |
| 48 | 1 | 0 | 4.835264 | -0.234574 | 0.926100  |
| 49 | 6 | 0 | 2.643831 | 3.363436  | -0.968030 |
| 50 | 6 | 0 | 1.655028 | 3.988613  | -1.952515 |
| 51 | 6 | 0 | 3.279508 | 4.394509  | -0.034947 |
| 52 | 1 | 0 | 3.434526 | 2.845221  | -1.528271 |
| 53 | 1 | 0 | 3.967027 | 0.703483  | 3.719133  |
| 54 | 1 | 0 | 5.648149 | 0.608603  | 3.142546  |
| 55 | 1 | 0 | 4.512755 | 1.753330  | 2.394885  |
| 56 | 1 | 0 | 5.323500 | -1.962268 | 2.670964  |
| 57 | 1 | 0 | 3.647614 | -1.839556 | 3.257745  |
| 58 | 1 | 0 | 3.973803 | -2.461289 | 1.625628  |
| 59 | 1 | 0 | 2.154498 | 4.739917  | -2.575524 |
| 60 | 1 | 0 | 1.231293 | 3.221133  | -2.608205 |
| 61 | 1 | 0 | 0.832529 | 4.470213  | -1.412409 |
| 62 | 1 | 0 | 2.508161 | 4.917665  | 0.541515  |
| 63 | 1 | 0 | 3.963849 | 3.907067  | 0.667474  |
| 64 | 1 | 0 | 3.846057 | 5.136006  | -0.610235 |
| 65 | 1 | 0 | 3.545346 | -1.898038 | -2.515877 |
| 66 | 7 | 0 | 3.283599 | 0.186054  | -1.344143 |
| 67 | 6 | 0 | 3.797496 | -0.582351 | -2.060400 |

E<sub>ZPE</sub>: B3LYP/6-31G\* = -2474.91236 (a.u.)  
 Gsol: B3LYP/6-311++G\*\*/(SMD,M06-2X/6-31G\*,CH2Cl2) = -2475.47824 (a.u.)

### TS<sub>12</sub>

Standard orientation:

| Center Number | Atomic Number | Atomic Type | Coordinates (Angstroms) |           |           |
|---------------|---------------|-------------|-------------------------|-----------|-----------|
|               |               |             | X                       | Y         | Z         |
| 1             | 6             | 0           | -1.530926               | -3.424653 | -0.128429 |
| 2             | 6             | 0           | -2.631727               | -2.854469 | 0.552705  |
| 3             | 6             | 0           | -2.659496               | -1.434186 | 0.759687  |
| 4             | 6             | 0           | -1.602487               | -0.602059 | 0.249084  |
| 5             | 6             | 0           | -0.475070               | -1.205797 | -0.318066 |
| 6             | 6             | 0           | -0.489793               | -2.629422 | -0.531316 |
| 7             | 6             | 0           | -1.690040               | 0.885277  | 0.336599  |
| 8             | 6             | 0           | -2.767587               | 1.613383  | -0.280119 |
| 9             | 6             | 0           | -2.872627               | 3.030727  | -0.077246 |
| 10            | 6             | 0           | -1.887403               | 3.692102  | 0.704654  |
| 11            | 6             | 0           | -0.822962               | 3.002070  | 1.222290  |
| 12            | 6             | 0           | -0.703759               | 1.600212  | 1.016461  |
| 13            | 6             | 0           | -3.749303               | -0.904592 | 1.509283  |
| 14            | 6             | 0           | -4.749860               | -1.718225 | 1.991490  |
| 15            | 6             | 0           | -4.731199               | -3.112950 | 1.751991  |
| 16            | 6             | 0           | -3.687279               | -3.665682 | 1.048817  |
| 17            | 6             | 0           | -3.734323               | 0.996490  | -1.124333 |
| 18            | 6             | 0           | -4.751625               | 1.724254  | -1.702516 |
| 19            | 6             | 0           | -4.869135               | 3.113794  | -1.469749 |
| 20            | 6             | 0           | -3.941617               | 3.748056  | -0.674940 |
| 21            | 1             | 0           | -1.497337               | -4.496395 | -0.306097 |
| 22            | 1             | 0           | -3.645115               | -4.737982 | 0.871258  |
| 23            | 1             | 0           | -5.531123               | -3.741176 | 2.133673  |
| 24            | 1             | 0           | -5.561933               | -1.283574 | 2.568164  |
| 25            | 1             | 0           | -3.776747               | 0.159162  | 1.712121  |
| 26            | 1             | 0           | -3.656777               | -0.066120 | -1.324878 |
| 27            | 1             | 0           | -5.468854               | 1.224148  | -2.348361 |
| 28            | 1             | 0           | -5.679639               | 3.675706  | -1.925832 |
| 29            | 1             | 0           | -4.005914               | 4.819790  | -0.499472 |
| 30            | 1             | 0           | -1.979726               | 4.763454  | 0.868439  |
| 31            | 1             | 0           | -0.043946               | 3.496756  | 1.793379  |
| 32            | 7             | 0           | 0.613750                | -3.189325 | -1.258391 |

|    |    |   |           |           |           |
|----|----|---|-----------|-----------|-----------|
| 33 | 8  | 0 | 0.606346  | -0.520301 | -0.716280 |
| 34 | 8  | 0 | 0.391136  | 0.975353  | 1.507004  |
| 35 | 22 | 0 | 1.789301  | 0.563778  | 0.336346  |
| 36 | 8  | 0 | 2.243066  | 2.210811  | -0.172375 |
| 37 | 8  | 0 | 2.811933  | -0.340273 | 1.495235  |
| 38 | 6  | 0 | 0.587228  | -3.673151 | -2.565534 |
| 39 | 6  | 0 | 1.880942  | -3.693554 | -2.998433 |
| 40 | 7  | 0 | 2.696623  | -3.238375 | -1.974493 |
| 41 | 6  | 0 | 1.897891  | -2.946885 | -0.952396 |
| 42 | 1  | 0 | -0.342643 | -3.930761 | -3.047352 |
| 43 | 1  | 0 | 2.283486  | -3.996294 | -3.953058 |
| 44 | 1  | 0 | 2.217509  | -2.481748 | -0.033075 |
| 45 | 6  | 0 | 4.118741  | -0.451373 | 2.046699  |
| 46 | 6  | 0 | 4.516199  | 0.864057  | 2.717259  |
| 47 | 6  | 0 | 4.139720  | -1.633434 | 3.015811  |
| 48 | 1  | 0 | 4.806615  | -0.653437 | 1.212751  |
| 49 | 6  | 0 | 2.830789  | 3.045100  | -1.162476 |
| 50 | 6  | 0 | 1.787555  | 3.374087  | -2.230326 |
| 51 | 6  | 0 | 3.393878  | 4.292290  | -0.481137 |
| 52 | 1  | 0 | 3.652473  | 2.478804  | -1.622054 |
| 53 | 1  | 0 | 3.834829  | 1.091523  | 3.544937  |
| 54 | 1  | 0 | 5.536682  | 0.802787  | 3.112716  |
| 55 | 1  | 0 | 4.472786  | 1.688845  | 1.998373  |
| 56 | 1  | 0 | 5.145386  | -1.774378 | 3.428475  |
| 57 | 1  | 0 | 3.443673  | -1.460639 | 3.844079  |
| 58 | 1  | 0 | 3.845322  | -2.557698 | 2.507126  |
| 59 | 1  | 0 | 2.222490  | 4.007544  | -3.012444 |
| 60 | 1  | 0 | 1.416349  | 2.455731  | -2.697051 |
| 61 | 1  | 0 | 0.937259  | 3.901745  | -1.784201 |
| 62 | 1  | 0 | 2.590442  | 4.866210  | -0.005880 |
| 63 | 1  | 0 | 4.122146  | 4.015757  | 0.288405  |
| 64 | 1  | 0 | 3.894048  | 4.935953  | -1.214122 |
| 65 | 1  | 0 | 3.599138  | -2.357780 | -2.050517 |
| 66 | 7  | 0 | 3.411410  | -0.128812 | -1.212155 |
| 67 | 6  | 0 | 3.917303  | -1.024497 | -1.767902 |

E<sub>ZPE</sub>: B3LYP/6-31G\* = -2474.91190 (a.u.)

Gsol: B3LYP/6-311++G\*\*/(SMD,M06-2X/6-31G\*,CH2Cl2) = -2475.47512 (a.u.)

### Int<sub>19</sub>

Standard orientation:

| Center Number | Atomic Number | Atomic Type | Coordinates (Angstroms) |           |           |
|---------------|---------------|-------------|-------------------------|-----------|-----------|
|               |               |             | X                       | Y         | Z         |
| 1             | 6             | 0           | 1.357054                | 3.452446  | -0.368032 |
| 2             | 6             | 0           | 2.511892                | 3.000144  | 0.308594  |
| 3             | 6             | 0           | 2.652264                | 1.597576  | 0.586384  |
| 4             | 6             | 0           | 1.663841                | 0.663499  | 0.124056  |
| 5             | 6             | 0           | 0.492407                | 1.145421  | -0.472232 |
| 6             | 6             | 0           | 0.373276                | 2.558057  | -0.711761 |
| 7             | 6             | 0           | 1.833036                | -0.807198 | 0.304325  |
| 8             | 6             | 0           | 2.963006                | -1.513726 | -0.237497 |
| 9             | 6             | 0           | 3.132237                | -2.909445 | 0.053491  |
| 10            | 6             | 0           | 2.154766                | -3.572696 | 0.843531  |
| 11            | 6             | 0           | 1.040955                | -2.909374 | 1.285849  |
| 12            | 6             | 0           | 0.855170                | -1.527712 | 0.996223  |
| 13            | 6             | 0           | 3.786870                | 1.193995  | 1.348819  |
| 14            | 6             | 0           | 4.728430                | 2.105167  | 1.769792  |
| 15            | 6             | 0           | 4.604178                | 3.479476  | 1.451627  |
| 16            | 6             | 0           | 3.513117                | 3.913505  | 0.738129  |
| 17            | 6             | 0           | 3.922872                | -0.900991 | -1.093054 |
| 18            | 6             | 0           | 4.992996                | -1.608397 | -1.596698 |
| 19            | 6             | 0           | 5.173251                | -2.973156 | -1.274957 |
| 20            | 6             | 0           | 4.253565                | -3.604947 | -0.468740 |
| 21            | 1             | 0           | 1.251945                | 4.509463  | -0.599169 |
| 22            | 1             | 0           | 3.389594                | 4.968289  | 0.502186  |
| 23            | 1             | 0           | 5.360713                | 4.185109  | 1.783219  |
| 24            | 1             | 0           | 5.576374                | 1.765541  | 2.358456  |
| 25            | 1             | 0           | 3.895313                | 0.148088  | 1.608433  |

|    |    |   |           |           |           |
|----|----|---|-----------|-----------|-----------|
| 26 | 1  | 0 | 3.798104  | 0.141653  | -1.363247 |
| 27 | 1  | 0 | 5.703115  | -1.111533 | -2.253000 |
| 28 | 1  | 0 | 6.024393  | -3.519090 | -1.672792 |
| 29 | 1  | 0 | 4.365029  | -4.659696 | -0.226228 |
| 30 | 1  | 0 | 2.293770  | -4.626908 | 1.073267  |
| 31 | 1  | 0 | 0.268045  | -3.409799 | 1.860272  |
| 32 | 7  | 0 | -0.859217 | 3.039995  | -1.271043 |
| 33 | 8  | 0 | -0.508486 | 0.359329  | -0.866600 |
| 34 | 8  | 0 | -0.279415 | -0.940470 | 1.416564  |
| 35 | 22 | 0 | -1.745425 | -0.674624 | 0.252789  |
| 36 | 8  | 0 | -2.123316 | -2.384748 | -0.084704 |
| 37 | 8  | 0 | -2.804461 | 0.193862  | 1.394412  |
| 38 | 6  | 0 | -1.549928 | 4.186530  | -0.877090 |
| 39 | 6  | 0 | -2.758120 | 4.167076  | -1.504359 |
| 40 | 7  | 0 | -2.781877 | 3.024100  | -2.282081 |
| 41 | 6  | 0 | -1.637634 | 2.357427  | -2.119400 |
| 42 | 1  | 0 | -1.128273 | 4.881492  | -0.170197 |
| 43 | 1  | 0 | -3.588684 | 4.852705  | -1.457574 |
| 44 | 1  | 0 | -1.412560 | 1.391643  | -2.531910 |
| 45 | 6  | 0 | -4.151248 | 0.373573  | 1.807595  |
| 46 | 6  | 0 | -4.574144 | -0.786938 | 2.708737  |
| 47 | 6  | 0 | -4.269224 | 1.730701  | 2.501978  |
| 48 | 1  | 0 | -4.774323 | 0.375511  | 0.901785  |
| 49 | 6  | 0 | -2.809445 | -3.319339 | -0.905835 |
| 50 | 6  | 0 | -1.822471 | -3.926719 | -1.903299 |
| 51 | 6  | 0 | -3.467139 | -4.371804 | -0.012843 |
| 52 | 1  | 0 | -3.586333 | -2.770338 | -1.455048 |
| 53 | 1  | 0 | -3.949525 | -0.819551 | 3.608586  |
| 54 | 1  | 0 | -5.621574 | -0.678239 | 3.013818  |
| 55 | 1  | 0 | -4.464685 | -1.739213 | 2.179736  |
| 56 | 1  | 0 | -5.307063 | 1.924719  | 2.797641  |
| 57 | 1  | 0 | -3.640251 | 1.757949  | 3.398882  |
| 58 | 1  | 0 | -3.944961 | 2.532478  | 1.829855  |
| 59 | 1  | 0 | -2.326759 | -4.653035 | -2.551678 |
| 60 | 1  | 0 | -1.387644 | -3.144661 | -2.534182 |
| 61 | 1  | 0 | -1.008093 | -4.434148 | -1.374269 |
| 62 | 1  | 0 | -2.708879 | -4.924272 | 0.553715  |
| 63 | 1  | 0 | -4.152107 | -3.898869 | 0.698733  |
| 64 | 1  | 0 | -4.037746 | -5.086081 | -0.617960 |
| 65 | 1  | 0 | -3.595758 | 2.525791  | -2.657053 |
| 66 | 7  | 0 | -3.160770 | -0.163641 | -1.334339 |
| 67 | 6  | 0 | -3.891388 | 0.346143  | -2.105130 |

E<sub>ZPE</sub>: B3LYP/6-31G\* = -2474.91563 (a.u.)  
Gsol: B3LYP/6-311++G\*\*/(SMD,M06-2X/6-31G\*,CH2Cl2) = -2475.49429 (a.u.)

### Int<sub>20</sub>

Standard orientation:

| Center Number | Atomic Number | Atomic Type | Coordinates (Angstroms) |           |           |
|---------------|---------------|-------------|-------------------------|-----------|-----------|
|               |               |             | X                       | Y         | Z         |
| 1             | 6             | 0           | -1.556456               | -3.378837 | -0.109977 |
| 2             | 6             | 0           | -2.650673               | -2.805263 | 0.577078  |
| 3             | 6             | 0           | -2.685157               | -1.380825 | 0.761100  |
| 4             | 6             | 0           | -1.643172               | -0.547995 | 0.224805  |
| 5             | 6             | 0           | -0.515930               | -1.149121 | -0.348285 |
| 6             | 6             | 0           | -0.529841               | -2.575730 | -0.536626 |
| 7             | 6             | 0           | -1.726553               | 0.939119  | 0.293148  |
| 8             | 6             | 0           | -2.811077               | 1.666412  | -0.310069 |
| 9             | 6             | 0           | -2.893888               | 3.088892  | -0.133409 |
| 10            | 6             | 0           | -1.879476               | 3.752938  | 0.608004  |
| 11            | 6             | 0           | -0.811276               | 3.060438  | 1.114287  |
| 12            | 6             | 0           | -0.712360               | 1.651712  | 0.936867  |
| 13            | 6             | 0           | -3.768463               | -0.847120 | 1.517884  |
| 14            | 6             | 0           | -4.756167               | -1.659574 | 2.026744  |
| 15            | 6             | 0           | -4.731331               | -3.058450 | 1.809592  |
| 16            | 6             | 0           | -3.693721               | -3.615678 | 1.101430  |
| 17            | 6             | 0           | -3.807479               | 1.045855  | -1.116594 |
| 18            | 6             | 0           | -4.831683               | 1.774585  | -1.681457 |

|    |    |   |           |           |           |
|----|----|---|-----------|-----------|-----------|
| 19 | 6  | 0 | -4.926323 | 3.169794  | -1.473859 |
| 20 | 6  | 0 | -3.969462 | 3.807471  | -0.717173 |
| 21 | 1  | 0 | -1.517283 | -4.453633 | -0.268578 |
| 22 | 1  | 0 | -3.646565 | -4.690620 | 0.941402  |
| 23 | 1  | 0 | -5.521464 | -3.685540 | 2.212886  |
| 24 | 1  | 0 | -5.563000 | -1.221468 | 2.608122  |
| 25 | 1  | 0 | -3.799177 | 0.219628  | 1.703614  |
| 26 | 1  | 0 | -3.747988 | -0.021302 | -1.299009 |
| 27 | 1  | 0 | -5.572057 | 1.270620  | -2.297688 |
| 28 | 1  | 0 | -5.741885 | 3.732879  | -1.919420 |
| 29 | 1  | 0 | -4.015587 | 4.883336  | -0.562056 |
| 30 | 1  | 0 | -1.953468 | 4.828946  | 0.749791  |
| 31 | 1  | 0 | -0.012187 | 3.557036  | 1.655240  |
| 32 | 7  | 0 | 0.562725  | -3.135552 | -1.284903 |
| 33 | 8  | 0 | 0.553261  | -0.476382 | -0.777456 |
| 34 | 8  | 0 | 0.376852  | 1.023797  | 1.415209  |
| 35 | 22 | 0 | 1.818919  | 0.542978  | 0.298613  |
| 36 | 8  | 0 | 2.399786  | 2.186597  | -0.091306 |
| 37 | 8  | 0 | 2.709413  | -0.446357 | 1.503979  |
| 38 | 6  | 0 | 0.477299  | -3.779183 | -2.518334 |
| 39 | 6  | 0 | 1.739864  | -3.849213 | -3.023345 |
| 40 | 7  | 0 | 2.575136  | -3.260533 | -2.090340 |
| 41 | 6  | 0 | 1.843430  | -2.828074 | -1.063197 |
| 42 | 1  | 0 | -0.471921 | -4.096195 | -2.918526 |
| 43 | 1  | 0 | 2.108630  | -4.255205 | -3.951439 |
| 44 | 1  | 0 | 2.224812  | -2.292938 | -0.210579 |
| 45 | 6  | 0 | 4.013014  | -0.628560 | 2.046980  |
| 46 | 6  | 0 | 4.464224  | 0.644710  | 2.762976  |
| 47 | 6  | 0 | 3.986626  | -1.842935 | 2.975434  |
| 48 | 1  | 0 | 4.690121  | -0.827775 | 1.203591  |
| 49 | 6  | 0 | 3.108912  | 2.995930  | -1.021332 |
| 50 | 6  | 0 | 2.136552  | 3.522868  | -2.076948 |
| 51 | 6  | 0 | 3.813116  | 4.116939  | -0.256700 |
| 52 | 1  | 0 | 3.859654  | 2.358439  | -1.507257 |
| 53 | 1  | 0 | 3.795348  | 0.869470  | 3.601582  |
| 54 | 1  | 0 | 5.483084  | 0.528864  | 3.150507  |
| 55 | 1  | 0 | 4.450065  | 1.495055  | 2.073751  |
| 56 | 1  | 0 | 4.985946  | -2.039133 | 3.380992  |
| 57 | 1  | 0 | 3.298643  | -1.670530 | 3.810531  |
| 58 | 1  | 0 | 3.653960  | -2.737328 | 2.437083  |
| 59 | 1  | 0 | 2.663277  | 4.145585  | -2.809766 |
| 60 | 1  | 0 | 1.662912  | 2.691467  | -2.609392 |
| 61 | 1  | 0 | 1.349954  | 4.124168  | -1.607220 |
| 62 | 1  | 0 | 3.081514  | 4.754869  | 0.252191  |
| 63 | 1  | 0 | 4.491738  | 3.702659  | 0.496253  |
| 64 | 1  | 0 | 4.398832  | 4.739406  | -0.943373 |
| 65 | 1  | 0 | 3.514071  | -2.861499 | -2.235361 |
| 66 | 7  | 0 | 3.294280  | -0.179940 | -1.160971 |
| 67 | 6  | 0 | 4.066500  | -0.835078 | -1.761906 |

-----  
E<sub>ZPE</sub>: B3LYP/6-31G\* = -2474.91490 (a.u.)  
Gsol: B3LYP/6-311++G\*\*/(SMD,M06-2X/6-31G\*,CH2Cl2) = -2475.49079 (a.u.)

### Int<sub>21</sub>

Standard orientation:

| Center Number | Atomic Number | Atomic Type | Coordinates (Angstroms) |           |           |
|---------------|---------------|-------------|-------------------------|-----------|-----------|
|               |               |             | X                       | Y         | Z         |
| 1             | 6             | 0           | -1.822653               | -3.602259 | 0.254489  |
| 2             | 6             | 0           | -3.220531               | -3.403510 | 0.236583  |
| 3             | 6             | 0           | -3.731304               | -2.071016 | 0.081620  |
| 4             | 6             | 0           | -2.829952               | -0.970958 | -0.111977 |
| 5             | 6             | 0           | -1.448882               | -1.184585 | -0.007983 |
| 6             | 6             | 0           | -0.971177               | -2.525781 | 0.172458  |
| 7             | 6             | 0           | -3.336166               | 0.407968  | -0.366628 |
| 8             | 6             | 0           | -4.174127               | 0.718697  | -1.492633 |
| 9             | 6             | 0           | -4.725723               | 2.037928  | -1.622678 |
| 10            | 6             | 0           | -4.400628               | 3.020239  | -0.648381 |
| 11            | 6             | 0           | -3.536646               | 2.735158  | 0.376119  |

|    |    |   |           |           |           |
|----|----|---|-----------|-----------|-----------|
| 12 | 6  | 0 | -2.972701 | 1.434283  | 0.509209  |
| 13 | 6  | 0 | -5.145071 | -1.901261 | 0.150283  |
| 14 | 6  | 0 | -5.987953 | -2.975884 | 0.319575  |
| 15 | 6  | 0 | -5.476156 | -4.292152 | 0.425844  |
| 16 | 6  | 0 | -4.117806 | -4.495777 | 0.388567  |
| 17 | 6  | 0 | -4.464810 | -0.219587 | -2.523991 |
| 18 | 6  | 0 | -5.269955 | 0.112580  | -3.591982 |
| 19 | 6  | 0 | -5.838543 | 1.403027  | -3.694682 |
| 20 | 6  | 0 | -5.563263 | 2.342697  | -2.727037 |
| 21 | 1  | 0 | -1.434226 | -4.613821 | 0.334674  |
| 22 | 1  | 0 | -3.704926 | -5.497325 | 0.489121  |
| 23 | 1  | 0 | -6.155020 | -5.131288 | 0.549919  |
| 24 | 1  | 0 | -7.060651 | -2.811368 | 0.376753  |
| 25 | 1  | 0 | -5.554401 | -0.901093 | 0.078934  |
| 26 | 1  | 0 | -4.029750 | -1.211483 | -2.470796 |
| 27 | 1  | 0 | -5.465921 | -0.625229 | -4.366067 |
| 28 | 1  | 0 | -6.477122 | 1.651469  | -4.538135 |
| 29 | 1  | 0 | -5.976878 | 3.346474  | -2.799478 |
| 30 | 1  | 0 | -4.832781 | 4.014258  | -0.742206 |
| 31 | 1  | 0 | -3.249614 | 3.484262  | 1.106947  |
| 32 | 7  | 0 | 0.444119  | -2.753962 | 0.287422  |
| 33 | 8  | 0 | -0.544294 | -0.213733 | -0.111557 |
| 34 | 8  | 0 | -2.087669 | 1.220717  | 1.498530  |
| 35 | 22 | 0 | -0.228875 | 1.266788  | 1.133234  |
| 36 | 8  | 0 | -0.137655 | 2.989168  | 0.656186  |
| 37 | 8  | 0 | 0.378954  | 0.859945  | 2.760534  |
| 38 | 6  | 0 | 1.031546  | -3.760458 | 1.048929  |
| 39 | 6  | 0 | 2.378631  | -3.657225 | 0.883548  |
| 40 | 7  | 0 | 2.597775  | -2.592543 | 0.036101  |
| 41 | 6  | 0 | 1.427337  | -2.054622 | -0.308448 |
| 42 | 1  | 0 | 0.440304  | -4.427147 | 1.653319  |
| 43 | 1  | 0 | 3.188646  | -4.232997 | 1.301476  |
| 44 | 1  | 0 | 1.282634  | -1.173326 | -0.908594 |
| 45 | 6  | 0 | 1.401832  | 1.176024  | 3.694219  |
| 46 | 6  | 0 | 1.104029  | 2.523108  | 4.353630  |
| 47 | 6  | 0 | 1.503752  | 0.034728  | 4.706473  |
| 48 | 1  | 0 | 2.345026  | 1.247539  | 3.133575  |
| 49 | 6  | 0 | 0.563777  | 3.974026  | -0.086797 |
| 50 | 6  | 0 | 0.087846  | 3.947816  | -1.539771 |
| 51 | 6  | 0 | 0.349690  | 5.334029  | 0.579082  |
| 52 | 1  | 0 | 1.631412  | 3.716319  | -0.055391 |
| 53 | 1  | 0 | 0.159468  | 2.476662  | 4.907515  |
| 54 | 1  | 0 | 1.904351  | 2.798627  | 5.050678  |
| 55 | 1  | 0 | 1.019049  | 3.307243  | 3.594348  |
| 56 | 1  | 0 | 2.314438  | 0.222137  | 5.420641  |
| 57 | 1  | 0 | 0.565304  | -0.066671 | 5.263129  |
| 58 | 1  | 0 | 1.704728  | -0.912431 | 4.194772  |
| 59 | 1  | 0 | 0.617358  | 4.701431  | -2.135138 |
| 60 | 1  | 0 | 0.276549  | 2.964042  | -1.981495 |
| 61 | 1  | 0 | -0.987771 | 4.150134  | -1.593244 |
| 62 | 1  | 0 | -0.712046 | 5.605260  | 0.565948  |
| 63 | 1  | 0 | 0.685084  | 5.309232  | 1.621315  |
| 64 | 1  | 0 | 0.913908  | 6.113146  | 0.052781  |
| 65 | 1  | 0 | 3.534042  | -2.244769 | -0.264977 |
| 66 | 7  | 0 | 1.771138  | 1.079636  | 0.342726  |
| 67 | 6  | 0 | 2.877172  | 0.939911  | -0.035860 |
| 68 | 6  | 0 | 9.562670  | 0.125008  | -2.107904 |
| 69 | 6  | 0 | 8.651804  | 1.146260  | -1.827476 |
| 70 | 6  | 0 | 7.357508  | 0.825092  | -1.422869 |
| 71 | 6  | 0 | 6.973960  | -0.519122 | -1.298220 |
| 72 | 6  | 0 | 7.895153  | -1.541714 | -1.581628 |
| 73 | 6  | 0 | 9.185039  | -1.218413 | -1.985144 |
| 74 | 6  | 0 | 5.601883  | -0.826177 | -0.873627 |
| 75 | 8  | 0 | 5.180513  | -1.979185 | -0.738088 |
| 76 | 1  | 0 | 4.929972  | 0.027093  | -0.672666 |
| 77 | 1  | 0 | 10.572155 | 0.374130  | -2.424162 |
| 78 | 1  | 0 | 8.950654  | 2.185880  | -1.924863 |
| 79 | 1  | 0 | 6.636308  | 1.608235  | -1.201851 |
| 80 | 1  | 0 | 7.576537  | -2.574530 | -1.479772 |
| 81 | 1  | 0 | 9.900921  | -2.005110 | -2.206221 |



-----  
 E<sub>ZPE</sub>: B3LYP/6-31G\* = -2820.40073 (a.u.)  
 Gsol: B3LYP/6-311++G\*\*/(SMD,M06-2X/6-31G\*,CH2Cl2) = -2821.08531 (a.u.)

Int<sub>22</sub>

Standard orientation:

| Center<br>Number | Atomic<br>Number | Atomic<br>Type | Coordinates (Angstroms) |           |           |
|------------------|------------------|----------------|-------------------------|-----------|-----------|
|                  |                  |                | X                       | Y         | Z         |
| 1                | 6                | 0              | -1.781180               | -3.566181 | 0.426296  |
| 2                | 6                | 0              | -3.148213               | -3.354182 | 0.707452  |
| 3                | 6                | 0              | -3.687973               | -2.033480 | 0.553505  |
| 4                | 6                | 0              | -2.849286               | -0.953790 | 0.115874  |
| 5                | 6                | 0              | -1.469061               | -1.162716 | -0.023852 |
| 6                | 6                | 0              | -0.977010               | -2.509298 | 0.069951  |
| 7                | 6                | 0              | -3.424176               | 0.393828  | -0.160583 |
| 8                | 6                | 0              | -4.430541               | 0.595628  | -1.167330 |
| 9                | 6                | 0              | -5.023890               | 1.893764  | -1.323501 |
| 10               | 6                | 0              | -4.579649               | 2.959915  | -0.494848 |
| 11               | 6                | 0              | -3.571097               | 2.772117  | 0.413464  |
| 12               | 6                | 0              | -2.966782               | 1.492292  | 0.568024  |
| 13               | 6                | 0              | -5.060312               | -1.844810 | 0.890834  |
| 14               | 6                | 0              | -5.841313               | -2.891821 | 1.324094  |
| 15               | 6                | 0              | -5.306173               | -4.197649 | 1.444556  |
| 16               | 6                | 0              | -3.983337               | -4.417954 | 1.145214  |
| 17               | 6                | 0              | -4.857444               | -0.433719 | -2.053951 |
| 18               | 6                | 0              | -5.822999               | -0.203851 | -3.009997 |
| 19               | 6                | 0              | -6.425194               | 1.068907  | -3.137569 |
| 20               | 6                | 0              | -6.025060               | 2.093203  | -2.309360 |
| 21               | 1                | 0              | -1.365212               | -4.565222 | 0.526613  |
| 22               | 1                | 0              | -3.549867               | -5.410512 | 1.247961  |
| 23               | 1                | 0              | -5.937062               | -5.014720 | 1.783314  |
| 24               | 1                | 0              | -6.881269               | -2.712529 | 1.583672  |
| 25               | 1                | 0              | -5.483526               | -0.850346 | 0.817500  |
| 26               | 1                | 0              | -4.401418               | -1.414651 | -1.979309 |
| 27               | 1                | 0              | -6.121225               | -1.009662 | -3.676104 |
| 28               | 1                | 0              | -7.189583               | 1.236843  | -3.891498 |
| 29               | 1                | 0              | -6.465774               | 3.083440  | -2.404596 |
| 30               | 1                | 0              | -5.042293               | 3.938103  | -0.607490 |
| 31               | 1                | 0              | -3.200345               | 3.582950  | 1.032183  |
| 32               | 7                | 0              | 0.385573                | -2.787864 | -0.297902 |
| 33               | 8                | 0              | -0.591759               | -0.196208 | -0.283772 |
| 34               | 8                | 0              | -1.949843               | 1.361390  | 1.437665  |
| 35               | 22               | 0              | -0.164743               | 1.361759  | 0.822171  |
| 36               | 8                | 0              | -0.124709               | 3.049263  | 0.230323  |
| 37               | 8                | 0              | 0.622410                | 1.000328  | 2.387883  |
| 38               | 6                | 0              | 0.783259                | -3.894832 | -1.042963 |
| 39               | 6                | 0              | 2.130240                | -3.803296 | -1.213734 |
| 40               | 7                | 0              | 2.535208                | -2.647364 | -0.581278 |
| 41               | 6                | 0              | 1.475085                | -2.045167 | -0.039454 |
| 42               | 1                | 0              | 0.066491                | -4.614412 | -1.401190 |
| 43               | 1                | 0              | 2.823773                | -4.443253 | -1.735003 |
| 44               | 1                | 0              | 1.496087                | -1.106035 | 0.485154  |
| 45               | 6                | 0              | 1.719187                | 1.381077  | 3.206922  |
| 46               | 6                | 0              | 1.493397                | 2.788359  | 3.761103  |
| 47               | 6                | 0              | 1.887468                | 0.336159  | 4.310452  |
| 48               | 1                | 0              | 2.615125                | 1.383712  | 2.568717  |
| 49               | 6                | 0              | 0.473743                | 3.976763  | -0.662782 |
| 50               | 6                | 0              | -0.215431               | 3.887313  | -2.025080 |
| 51               | 6                | 0              | 0.383992                | 5.374470  | -0.048956 |
| 52               | 1                | 0              | 1.529522                | 3.694543  | -0.774778 |
| 53               | 1                | 0              | 0.594024                | 2.812453  | 4.386918  |
| 54               | 1                | 0              | 2.349351                | 3.107229  | 4.367603  |
| 55               | 1                | 0              | 1.362159                | 3.503732  | 2.942871  |
| 56               | 1                | 0              | 2.756664                | 0.571869  | 4.935775  |
| 57               | 1                | 0              | 0.996815                | 0.306349  | 4.947989  |
| 58               | 1                | 0              | 2.032961                | -0.659768 | 3.878371  |
| 59               | 1                | 0              | 0.227778                | 4.600689  | -2.730267 |
| 60               | 1                | 0              | -0.108233               | 2.880347  | -2.441268 |

|    |   |   |           |           |           |
|----|---|---|-----------|-----------|-----------|
| 61 | 1 | 0 | -1.284289 | 4.108268  | -1.927385 |
| 62 | 1 | 0 | -0.663109 | 5.673146  | 0.075642  |
| 63 | 1 | 0 | 0.866772  | 5.394868  | 0.933778  |
| 64 | 1 | 0 | 0.880498  | 6.109724  | -0.693340 |
| 65 | 1 | 0 | 3.514974  | -2.289263 | -0.566697 |
| 66 | 7 | 0 | 1.787145  | 1.136397  | -0.094704 |
| 67 | 6 | 0 | 2.905727  | 1.006202  | -0.439812 |
| 68 | 6 | 0 | 8.853044  | 1.079365  | -1.080448 |
| 69 | 6 | 0 | 7.500160  | 0.761950  | -0.975098 |
| 70 | 6 | 0 | 7.098658  | -0.580084 | -0.888630 |
| 71 | 6 | 0 | 8.060654  | -1.604187 | -0.908524 |
| 72 | 6 | 0 | 9.408930  | -1.284491 | -1.014128 |
| 73 | 6 | 0 | 9.804385  | 0.056703  | -1.099800 |
| 74 | 6 | 0 | 5.665920  | -0.881355 | -0.773360 |
| 75 | 8 | 0 | 5.223328  | -2.031094 | -0.685274 |
| 76 | 1 | 0 | 4.969678  | -0.023645 | -0.759520 |
| 77 | 1 | 0 | 9.166227  | 2.117207  | -1.146825 |
| 78 | 1 | 0 | 6.746856  | 1.545853  | -0.957563 |
| 79 | 1 | 0 | 7.727864  | -2.635234 | -0.838941 |
| 80 | 1 | 0 | 10.156898 | -2.072245 | -1.029631 |
| 81 | 1 | 0 | 10.859750 | 0.302952  | -1.181687 |

-----  
 E<sub>ZPE</sub>: B3LYP/6-31G\* = -2820.39933 (a.u.)  
 Gsol: B3LYP/6-311++G\*\*/(SMD,M06-2X/6-31G\*,CH2Cl2) = -2821.08368 (a.u.)

### TS<sub>13</sub>

Standard orientation:

| Center<br>Number | Atomic<br>Number | Atomic<br>Type | Coordinates (Angstroms) |           |           |
|------------------|------------------|----------------|-------------------------|-----------|-----------|
|                  |                  |                | X                       | Y         | Z         |
| 1                | 6                | 0              | -1.662961               | -3.597076 | -0.011822 |
| 2                | 6                | 0              | -2.990307               | -3.381611 | 0.423147  |
| 3                | 6                | 0              | -3.480519               | -2.035735 | 0.521749  |
| 4                | 6                | 0              | -2.647507               | -0.932616 | 0.130064  |
| 5                | 6                | 0              | -1.314830               | -1.172367 | -0.221903 |
| 6                | 6                | 0              | -0.849772               | -2.527051 | -0.294149 |
| 7                | 6                | 0              | -3.156763               | 0.469412  | 0.150676  |
| 8                | 6                | 0              | -4.290533               | 0.881353  | -0.631515 |
| 9                | 6                | 0              | -4.805510               | 2.213697  | -0.485996 |
| 10               | 6                | 0              | -4.159245               | 3.109600  | 0.407855  |
| 11               | 6                | 0              | -3.032765               | 2.730545  | 1.089976  |
| 12               | 6                | 0              | -2.506705               | 1.416773  | 0.944355  |
| 13               | 6                | 0              | -4.795916               | -1.855922 | 1.039631  |
| 14               | 6                | 0              | -5.579086               | -2.930814 | 1.394722  |
| 15               | 6                | 0              | -5.102399               | -4.256178 | 1.252461  |
| 16               | 6                | 0              | -3.830006               | -4.471430 | 0.779731  |
| 17               | 6                | 0              | -4.922029               | 0.031974  | -1.584416 |
| 18               | 6                | 0              | -6.006562               | 0.458955  | -2.319445 |
| 19               | 6                | 0              | -6.529833               | 1.761024  | -2.145851 |
| 20               | 6                | 0              | -5.932973               | 2.616883  | -1.248161 |
| 21               | 1                | 0              | -1.291627               | -4.613462 | -0.113763 |
| 22               | 1                | 0              | -3.439033               | -5.481856 | 0.682146  |
| 23               | 1                | 0              | -5.735628               | -5.094643 | 1.528594  |
| 24               | 1                | 0              | -6.575122               | -2.758765 | 1.793732  |
| 25               | 1                | 0              | -5.175801               | -0.849316 | 1.164338  |
| 26               | 1                | 0              | -4.529814               | -0.966815 | -1.740729 |
| 27               | 1                | 0              | -6.461321               | -0.211776 | -3.044023 |
| 28               | 1                | 0              | -7.389417               | 2.084245  | -2.726705 |
| 29               | 1                | 0              | -6.311592               | 3.628069  | -1.114628 |
| 30               | 1                | 0              | -4.561944               | 4.113106  | 0.526814  |
| 31               | 1                | 0              | -2.507707               | 3.412729  | 1.750893  |
| 32               | 7                | 0              | 0.523797                | -2.761424 | -0.636016 |
| 33               | 8                | 0              | -0.448946               | -0.200991 | -0.528050 |
| 34               | 8                | 0              | -1.367005               | 1.111492  | 1.598392  |
| 35               | 22               | 0              | 0.275013                | 1.124538  | 0.683133  |
| 36               | 8                | 0              | 0.335862                | 2.853472  | 0.246776  |
| 37               | 8                | 0              | 1.324121                | 0.567341  | 2.009849  |
| 38               | 6                | 0              | 1.364910                | -3.691835 | -0.034160 |
| 39               | 6                | 0              | 2.593679                | -3.546890 | -0.606870 |

|    |   |   |           |           |           |
|----|---|---|-----------|-----------|-----------|
| 40 | 7 | 0 | 2.491760  | -2.544708 | -1.547238 |
| 41 | 6 | 0 | 1.246568  | -2.080240 | -1.543558 |
| 42 | 1 | 0 | 1.013996  | -4.338084 | 0.753238  |
| 43 | 1 | 0 | 3.521497  | -4.062094 | -0.415952 |
| 44 | 1 | 0 | 0.879896  | -1.259763 | -2.134105 |
| 45 | 6 | 0 | 2.574352  | 0.710794  | 2.668445  |
| 46 | 6 | 0 | 2.542351  | 1.947424  | 3.567137  |
| 47 | 6 | 0 | 2.866734  | -0.574407 | 3.442896  |
| 48 | 1 | 0 | 3.342141  | 0.844951  | 1.892758  |
| 49 | 6 | 0 | 0.806722  | 3.905060  | -0.579999 |
| 50 | 6 | 0 | -0.222919 | 4.184794  | -1.675424 |
| 51 | 6 | 0 | 1.089478  | 5.130080  | 0.290657  |
| 52 | 1 | 0 | 1.744552  | 3.567760  | -1.043981 |
| 53 | 1 | 0 | 1.772020  | 1.838433  | 4.338822  |
| 54 | 1 | 0 | 3.511229  | 2.092919  | 4.059088  |
| 55 | 1 | 0 | 2.314455  | 2.842016  | 2.978108  |
| 56 | 1 | 0 | 3.846740  | -0.515931 | 3.930708  |
| 57 | 1 | 0 | 2.103118  | -0.739481 | 4.211291  |
| 58 | 1 | 0 | 2.868399  | -1.435000 | 2.765840  |
| 59 | 1 | 0 | 0.125014  | 4.986697  | -2.337397 |
| 60 | 1 | 0 | -0.392064 | 3.287189  | -2.279178 |
| 61 | 1 | 0 | -1.179258 | 4.484368  | -1.233154 |
| 62 | 1 | 0 | 0.169546  | 5.477546  | 0.774145  |
| 63 | 1 | 0 | 1.818208  | 4.887508  | 1.071300  |
| 64 | 1 | 0 | 1.493309  | 5.948764  | -0.316562 |
| 65 | 1 | 0 | 3.271094  | -2.042617 | -2.109368 |
| 66 | 7 | 0 | 2.059999  | 0.918300  | -0.655731 |
| 67 | 6 | 0 | 3.061335  | 0.805181  | -1.249756 |
| 68 | 6 | 0 | 7.719702  | -0.438495 | 0.498220  |
| 69 | 6 | 0 | 7.149543  | 0.819688  | 0.275767  |
| 70 | 6 | 0 | 6.103593  | 0.960843  | -0.632574 |
| 71 | 6 | 0 | 5.609893  | -0.152179 | -1.324594 |
| 72 | 6 | 0 | 6.192284  | -1.403888 | -1.109114 |
| 73 | 6 | 0 | 7.241231  | -1.548310 | -0.198018 |
| 74 | 6 | 0 | 4.528143  | -0.011573 | -2.373978 |
| 75 | 8 | 0 | 4.040894  | -1.034468 | -2.941928 |
| 76 | 1 | 0 | 4.631653  | 0.902150  | -2.978635 |
| 77 | 1 | 0 | 8.537210  | -0.548269 | 1.205885  |
| 78 | 1 | 0 | 7.522676  | 1.688560  | 0.811568  |
| 79 | 1 | 0 | 5.650575  | 1.935729  | -0.798712 |
| 80 | 1 | 0 | 5.834813  | -2.252164 | -1.685271 |
| 81 | 1 | 0 | 7.691367  | -2.525270 | -0.040556 |

E<sub>ZPE</sub>: B3LYP/6-31G\* = -2820.38573 (a.u.)

Gsol: B3LYP/6-311++G\*\*/(SMD,M06-2X/6-31G\*,CH2Cl2) = -2821.06430 (a.u.)

#### TS<sub>14</sub>

Standard orientation:

| Center Number | Atomic Number | Atomic Type | Coordinates (Angstroms) |           |           |
|---------------|---------------|-------------|-------------------------|-----------|-----------|
|               |               |             | X                       | Y         | Z         |
| 1             | 7             | 0           | -2.273313               | -0.014127 | 0.327110  |
| 2             | 6             | 0           | -3.324598               | 0.315614  | -0.065097 |
| 3             | 6             | 0           | 2.487036                | 3.347792  | -0.583503 |
| 4             | 6             | 0           | 3.784212                | 2.824049  | -0.382627 |
| 5             | 6             | 0           | 3.938095                | 1.415425  | -0.153735 |
| 6             | 6             | 0           | 2.791041                | 0.550972  | -0.178300 |
| 7             | 6             | 0           | 1.513669                | 1.110357  | -0.291230 |
| 8             | 6             | 0           | 1.391161                | 2.522929  | -0.510319 |
| 9             | 6             | 0           | 2.932189                | -0.926780 | -0.031214 |
| 10            | 6             | 0           | 3.705456                | -1.712875 | -0.954128 |
| 11            | 6             | 0           | 3.896856                | -3.113772 | -0.704542 |
| 12            | 6             | 0           | 3.289220                | -3.700430 | 0.438309  |
| 13            | 6             | 0           | 2.491290                | -2.957836 | 1.268833  |
| 14            | 6             | 0           | 2.282855                | -1.571977 | 1.023033  |
| 15            | 6             | 0           | 5.252699                | 0.936455  | 0.116444  |
| 16            | 6             | 0           | 6.336494                | 1.785148  | 0.123998  |
| 17            | 6             | 0           | 6.179833                | 3.166474  | -0.143546 |
| 18            | 6             | 0           | 4.925140                | 3.671480  | -0.387744 |

|    |    |   |           |           |           |
|----|----|---|-----------|-----------|-----------|
| 19 | 6  | 0 | 4.273897  | -1.172362 | -2.142840 |
| 20 | 6  | 0 | 5.005377  | -1.955370 | -3.009222 |
| 21 | 6  | 0 | 5.218027  | -3.327006 | -2.739710 |
| 22 | 6  | 0 | 4.668167  | -3.888527 | -1.609654 |
| 23 | 1  | 0 | 2.366057  | 4.407678  | -0.791041 |
| 24 | 1  | 0 | 4.782714  | 4.733218  | -0.576862 |
| 25 | 1  | 0 | 7.045911  | 3.822359  | -0.142203 |
| 26 | 1  | 0 | 7.324763  | 1.389655  | 0.342662  |
| 27 | 1  | 0 | 5.392263  | -0.115982 | 0.331192  |
| 28 | 1  | 0 | 4.113856  | -0.125092 | -2.373888 |
| 29 | 1  | 0 | 5.419298  | -1.513763 | -3.912204 |
| 30 | 1  | 0 | 5.801957  | -3.932778 | -3.427320 |
| 31 | 1  | 0 | 4.807132  | -4.946116 | -1.395523 |
| 32 | 1  | 0 | 3.450470  | -4.758470 | 0.633065  |
| 33 | 1  | 0 | 1.993660  | -3.398068 | 2.127014  |
| 34 | 7  | 0 | 0.078915  | 3.090973  | -0.626897 |
| 35 | 8  | 0 | 0.390045  | 0.386912  | -0.239385 |
| 36 | 8  | 0 | 1.446111  | -0.898705 | 1.839398  |
| 37 | 22 | 0 | -0.319961 | -0.556936 | 1.292789  |
| 38 | 8  | 0 | -0.905803 | -2.236707 | 1.181162  |
| 39 | 8  | 0 | -0.849514 | 0.399077  | 2.701302  |
| 40 | 6  | 0 | -0.331420 | 4.313391  | -0.104316 |
| 41 | 6  | 0 | -1.655241 | 4.449207  | -0.402948 |
| 42 | 7  | 0 | -2.039304 | 3.324177  | -1.100300 |
| 43 | 6  | 0 | -0.987676 | 2.520973  | -1.218516 |
| 44 | 1  | 0 | 0.346259  | 4.945157  | 0.445599  |
| 45 | 1  | 0 | -2.345883 | 5.244495  | -0.170742 |
| 46 | 1  | 0 | -0.990271 | 1.545157  | -1.670193 |
| 47 | 6  | 0 | -1.884121 | 0.605072  | 3.651247  |
| 48 | 6  | 0 | -1.953347 | -0.583459 | 4.611025  |
| 49 | 6  | 0 | -1.626966 | 1.929088  | 4.371179  |
| 50 | 1  | 0 | -2.830750 | 0.675746  | 3.094862  |
| 51 | 6  | 0 | -1.771308 | -3.204179 | 0.605680  |
| 52 | 6  | 0 | -1.165324 | -3.714774 | -0.702022 |
| 53 | 6  | 0 | -2.002400 | -4.321588 | 1.623417  |
| 54 | 1  | 0 | -2.727272 | -2.706599 | 0.389890  |
| 55 | 1  | 0 | -1.014203 | -0.678168 | 5.167659  |
| 56 | 1  | 0 | -2.772453 | -0.454939 | 5.328344  |
| 57 | 1  | 0 | -2.119792 | -1.512997 | 4.056882  |
| 58 | 1  | 0 | -2.432485 | 2.144361  | 5.083114  |
| 59 | 1  | 0 | -0.679297 | 1.886489  | 4.919421  |
| 60 | 1  | 0 | -1.571449 | 2.751864  | 3.650735  |
| 61 | 1  | 0 | -1.821638 | -4.460730 | -1.165480 |
| 62 | 1  | 0 | -1.029118 | -2.889771 | -1.408859 |
| 63 | 1  | 0 | -0.187815 | -4.173042 | -0.515789 |
| 64 | 1  | 0 | -1.057807 | -4.823022 | 1.862119  |
| 65 | 1  | 0 | -2.421982 | -3.917753 | 2.550800  |
| 66 | 1  | 0 | -2.700569 | -5.066356 | 1.223769  |
| 67 | 1  | 0 | -3.041247 | 2.965423  | -1.397554 |
| 68 | 6  | 0 | -7.650186 | -1.482176 | -2.195842 |
| 69 | 6  | 0 | -7.560192 | -1.127908 | -0.846967 |
| 70 | 6  | 0 | -6.607981 | -0.197036 | -0.434822 |
| 71 | 6  | 0 | -5.739042 | 0.382879  | -1.364847 |
| 72 | 6  | 0 | -5.835662 | 0.031623  | -2.714308 |
| 73 | 6  | 0 | -6.787482 | -0.900118 | -3.127677 |
| 74 | 6  | 0 | -4.739282 | 1.420526  | -0.933281 |
| 75 | 8  | 0 | -4.167637 | 2.130571  | -1.821972 |
| 76 | 1  | 0 | -4.990256 | 1.877022  | 0.039445  |
| 77 | 1  | 0 | -8.393319 | -2.206458 | -2.519209 |
| 78 | 1  | 0 | -8.233046 | -1.574710 | -0.119731 |
| 79 | 1  | 0 | -6.532031 | 0.078388  | 0.615457  |
| 80 | 1  | 0 | -5.165381 | 0.506554  | -3.423415 |
| 81 | 1  | 0 | -6.859745 | -1.170194 | -4.178074 |

E<sub>ZPE</sub>: B3LYP/6-31G\* = -2820.38797 (a.u.)

Gsol: B3LYP/6-311++G\*\*/(SMD,M06-2X/6-31G\*,CH2Cl2) = -2821.06652 (a.u.)

TS<sub>15</sub>

Standard orientation:

| Center<br>Number | Atomic<br>Number | Atomic<br>Type | Coordinates (Angstroms) |           |           |
|------------------|------------------|----------------|-------------------------|-----------|-----------|
|                  |                  |                | X                       | Y         | Z         |
| 1                | 6                | 0              | -1.427458               | -3.578600 | 0.517455  |
| 2                | 6                | 0              | -2.827156               | -3.399398 | 0.601906  |
| 3                | 6                | 0              | -3.372459               | -2.084423 | 0.413263  |
| 4                | 6                | 0              | -2.510204               | -0.981045 | 0.088292  |
| 5                | 6                | 0              | -1.124496               | -1.175531 | 0.079150  |
| 6                | 6                | 0              | -0.612412               | -2.499647 | 0.283556  |
| 7                | 6                | 0              | -3.061277               | 0.377503  | -0.185206 |
| 8                | 6                | 0              | -3.996140               | 0.622754  | -1.249681 |
| 9                | 6                | 0              | -4.584920               | 1.924487  | -1.389982 |
| 10               | 6                | 0              | -4.205119               | 2.954556  | -0.487697 |
| 11               | 6                | 0              | -3.254741               | 2.731202  | 0.474248  |
| 12               | 6                | 0              | -2.652939               | 1.449446  | 0.611675  |
| 13               | 6                | 0              | -4.777577               | -1.928847 | 0.594155  |
| 14               | 6                | 0              | -5.583719               | -3.001590 | 0.901118  |
| 15               | 6                | 0              | -5.041245               | -4.300982 | 1.046776  |
| 16               | 6                | 0              | -3.687298               | -4.489310 | 0.904712  |
| 17               | 6                | 0              | -4.349885               | -0.367177 | -2.210219 |
| 18               | 6                | 0              | -5.246006               | -0.097877 | -3.221731 |
| 19               | 6                | 0              | -5.847997               | 1.176690  | -3.333644 |
| 20               | 6                | 0              | -5.515996               | 2.164255  | -2.434219 |
| 21               | 1                | 0              | -0.998352               | -4.564364 | 0.678006  |
| 22               | 1                | 0              | -3.248606               | -5.476232 | 1.034288  |
| 23               | 1                | 0              | -5.691454               | -5.138579 | 1.283211  |
| 24               | 1                | 0              | -6.650456               | -2.847007 | 1.039425  |
| 25               | 1                | 0              | -5.210862               | -0.941021 | 0.497555  |
| 26               | 1                | 0              | -3.891537               | -1.347910 | -2.148111 |
| 27               | 1                | 0              | -5.488934               | -0.873059 | -3.944075 |
| 28               | 1                | 0              | -6.557996               | 1.375114  | -4.131936 |
| 29               | 1                | 0              | -5.956038               | 3.155855  | -2.516284 |
| 30               | 1                | 0              | -4.666707               | 3.934595  | -0.586490 |
| 31               | 1                | 0              | -2.930017               | 3.516249  | 1.149565  |
| 32               | 7                | 0              | 0.807895                | -2.695539 | 0.200502  |
| 33               | 8                | 0              | -0.242237               | -0.197418 | -0.144774 |
| 34               | 8                | 0              | -1.679484               | 1.295730  | 1.534682  |
| 35               | 22               | 0              | 0.117054                | 1.317802  | 0.979930  |
| 36               | 8                | 0              | 0.201265                | 3.015190  | 0.427204  |
| 37               | 8                | 0              | 0.904619                | 0.859464  | 2.527196  |
| 38               | 6                | 0              | 1.466150                | -3.571870 | -0.653906 |
| 39               | 6                | 0              | 2.802647                | -3.363846 | -0.482254 |
| 40               | 7                | 0              | 2.943540                | -2.377832 | 0.471421  |
| 41               | 6                | 0              | 1.734968                | -1.982978 | 0.860735  |
| 42               | 1                | 0              | 0.919144                | -4.230541 | -1.308587 |
| 43               | 1                | 0              | 3.653741                | -3.815661 | -0.965799 |
| 44               | 1                | 0              | 1.526775                | -1.203060 | 1.577172  |
| 45               | 6                | 0              | 1.997183                | 1.144346  | 3.399605  |
| 46               | 6                | 0              | 2.159747                | 2.653047  | 3.578004  |
| 47               | 6                | 0              | 1.756057                | 0.420103  | 4.724348  |
| 48               | 1                | 0              | 2.901984                | 0.739038  | 2.922487  |
| 49               | 6                | 0              | 0.769079                | 3.974495  | -0.452035 |
| 50               | 6                | 0              | 0.098170                | 3.874087  | -1.822518 |
| 51               | 6                | 0              | 0.620854                | 5.360465  | 0.176699  |
| 52               | 1                | 0              | 1.836914                | 3.735399  | -0.556334 |
| 53               | 1                | 0              | 1.256790                | 3.084056  | 4.025967  |
| 54               | 1                | 0              | 3.010810                | 2.871635  | 4.233245  |
| 55               | 1                | 0              | 2.332866                | 3.137278  | 2.612184  |
| 56               | 1                | 0              | 2.605234                | 0.566636  | 5.401659  |
| 57               | 1                | 0              | 0.851131                | 0.802703  | 5.209115  |
| 58               | 1                | 0              | 1.628156                | -0.655381 | 4.561877  |
| 59               | 1                | 0              | 0.527172                | 4.606454  | -2.516729 |
| 60               | 1                | 0              | 0.239477                | 2.874241  | -2.245834 |
| 61               | 1                | 0              | -0.977617               | 4.062296  | -1.735113 |
| 62               | 1                | 0              | -0.438279               | 5.617118  | 0.291545  |
| 63               | 1                | 0              | 1.090507                | 5.386923  | 1.165351  |
| 64               | 1                | 0              | 1.096320                | 6.121026  | -0.453775 |
| 65               | 1                | 0              | 3.835133                | -1.840922 | 0.754288  |
| 66               | 6                | 0              | 6.693434                | -1.103940 | -3.514916 |
| 67               | 6                | 0              | 6.683186                | -1.982772 | -2.432138 |

|    |   |   |          |           |           |
|----|---|---|----------|-----------|-----------|
| 68 | 6 | 0 | 6.136654 | -1.580661 | -1.210669 |
| 69 | 6 | 0 | 5.591110 | -0.300627 | -1.064896 |
| 70 | 6 | 0 | 5.616453 | 0.580686  | -2.152397 |
| 71 | 6 | 0 | 6.161048 | 0.181676  | -3.370213 |
| 72 | 6 | 0 | 5.094553 | 0.117910  | 0.300460  |
| 73 | 8 | 0 | 4.849674 | -0.750491 | 1.189352  |
| 74 | 1 | 0 | 5.491307 | 1.088779  | 0.632839  |
| 75 | 1 | 0 | 7.117391 | -1.413787 | -4.466431 |
| 76 | 1 | 0 | 7.110930 | -2.977201 | -2.532920 |
| 77 | 1 | 0 | 6.156818 | -2.242218 | -0.349262 |
| 78 | 1 | 0 | 5.182204 | 1.571127  | -2.043646 |
| 79 | 1 | 0 | 6.166402 | 0.870001  | -4.211203 |
| 80 | 7 | 0 | 2.154766 | 1.127120  | 0.080952  |
| 81 | 6 | 0 | 3.294477 | 0.967198  | -0.130355 |

-----  
E<sub>ZPE</sub>: B3LYP/6-31G\* = -2820.38457 (a.u.)  
Gsol: B3LYP/6-311++G\*\*/(SMD,M06-2X/6-31G\*,CH2Cl2) = -2821.05824 (a.u.)

**TS<sub>16</sub>**

Standard orientation:

| Center<br>Number | Atomic<br>Number | Atomic<br>Type | Coordinates (Angstroms) |           |           |
|------------------|------------------|----------------|-------------------------|-----------|-----------|
|                  |                  |                | X                       | Y         | Z         |
| 1                | 6                | 0              | -2.361572               | -3.472433 | -0.094749 |
| 2                | 6                | 0              | -3.638023               | -3.017887 | 0.306998  |
| 3                | 6                | 0              | -3.866772               | -1.605519 | 0.421256  |
| 4                | 6                | 0              | -2.823843               | -0.672578 | 0.092684  |
| 5                | 6                | 0              | -1.543962               | -1.153599 | -0.208003 |
| 6                | 6                | 0              | -1.353191               | -2.570843 | -0.329540 |
| 7                | 6                | 0              | -3.077343               | 0.797294  | 0.106040  |
| 8                | 6                | 0              | -4.073292               | 1.404412  | -0.735330 |
| 9                | 6                | 0              | -4.355032               | 2.805777  | -0.600665 |
| 10               | 6                | 0              | -3.619059               | 3.570666  | 0.344427  |
| 11               | 6                | 0              | -2.620431               | 2.997564  | 1.087475  |
| 12               | 6                | 0              | -2.323614               | 1.612978  | 0.951393  |
| 13               | 6                | 0              | -5.142038               | -1.187087 | 0.900393  |
| 14               | 6                | 0              | -6.125038               | -2.099386 | 1.210899  |
| 15               | 6                | 0              | -5.901306               | -3.489102 | 1.060312  |
| 16               | 6                | 0              | -4.677368               | -3.934502 | 0.621550  |
| 17               | 6                | 0              | -4.785049               | 0.683076  | -1.735838 |
| 18               | 6                | 0              | -5.730469               | 1.297473  | -2.527988 |
| 19               | 6                | 0              | -6.026470               | 2.670673  | -2.367175 |
| 20               | 6                | 0              | -5.345064               | 3.404397  | -1.422754 |
| 21               | 1                | 0              | -2.171946               | -4.539215 | -0.181452 |
| 22               | 1                | 0              | -4.479245               | -4.999195 | 0.519382  |
| 23               | 1                | 0              | -6.689078               | -4.196419 | 1.303958  |
| 24               | 1                | 0              | -7.083757               | -1.747572 | 1.582422  |
| 25               | 1                | 0              | -5.329272               | -0.128544 | 1.033373  |
| 26               | 1                | 0              | -4.565442               | -0.368535 | -1.882774 |
| 27               | 1                | 0              | -6.250887               | 0.720190  | -3.288016 |
| 28               | 1                | 0              | -6.778563               | 3.142484  | -2.993649 |
| 29               | 1                | 0              | -5.547768               | 4.465847  | -1.296904 |
| 30               | 1                | 0              | -3.847466               | 4.628500  | 0.454597  |
| 31               | 1                | 0              | -2.027306               | 3.574591  | 1.789643  |
| 32               | 7                | 0              | -0.077128               | -3.055008 | -0.774888 |
| 33               | 8                | 0              | -0.489355               | -0.362364 | -0.429851 |
| 34               | 8                | 0              | -1.296686               | 1.105268  | 1.665171  |
| 35               | 22               | 0              | 0.357671                | 0.833545  | 0.817723  |
| 36               | 8                | 0              | 0.757655                | 2.536585  | 0.454703  |
| 37               | 8                | 0              | 1.208190                | 0.006723  | 2.161772  |
| 38               | 6                | 0              | 0.130550                | -3.927309 | -1.837283 |
| 39               | 6                | 0              | 1.479956                | -4.055905 | -1.985579 |
| 40               | 7                | 0              | 2.079155                | -3.273734 | -1.021055 |
| 41               | 6                | 0              | 1.126636                | -2.678460 | -0.309455 |
| 42               | 1                | 0              | -0.697100               | -4.342285 | -2.389030 |
| 43               | 1                | 0              | 2.054957                | -4.629909 | -2.695053 |
| 44               | 1                | 0              | 1.290788                | -1.993854 | 0.505888  |
| 45               | 6                | 0              | 2.403494                | 0.042929  | 2.936548  |
| 46               | 6                | 0              | 2.501288                | 1.372509  | 3.685036  |

|    |   |   |           |           |           |
|----|---|---|-----------|-----------|-----------|
| 47 | 6 | 0 | 2.409119  | -1.161449 | 3.877630  |
| 48 | 1 | 0 | 3.247090  | -0.040069 | 2.235834  |
| 49 | 6 | 0 | 1.397187  | 3.463896  | -0.411343 |
| 50 | 6 | 0 | 0.562379  | 3.636173  | -1.680770 |
| 51 | 6 | 0 | 1.601130  | 4.777025  | 0.344473  |
| 52 | 1 | 0 | 2.376753  | 3.043408  | -0.678503 |
| 53 | 1 | 0 | 1.662917  | 1.480710  | 4.382587  |
| 54 | 1 | 0 | 3.436897  | 1.426072  | 4.253628  |
| 55 | 1 | 0 | 2.475365  | 2.211308  | 2.981861  |
| 56 | 1 | 0 | 3.335670  | -1.186960 | 4.462701  |
| 57 | 1 | 0 | 1.560881  | -1.109510 | 4.569234  |
| 58 | 1 | 0 | 2.335895  | -2.096556 | 3.312253  |
| 59 | 1 | 0 | 1.043727  | 4.342941  | -2.367123 |
| 60 | 1 | 0 | 0.449856  | 2.676856  | -2.196682 |
| 61 | 1 | 0 | -0.436009 | 4.013096  | -1.432687 |
| 62 | 1 | 0 | 0.635381  | 5.210161  | 0.628157  |
| 63 | 1 | 0 | 2.185461  | 4.610657  | 1.255398  |
| 64 | 1 | 0 | 2.136229  | 5.500504  | -0.281749 |
| 65 | 1 | 0 | 3.142604  | -2.982827 | -0.920522 |
| 66 | 7 | 0 | 2.180960  | 0.350490  | -0.397965 |
| 67 | 6 | 0 | 3.192600  | 0.006286  | -0.873678 |
| 68 | 6 | 0 | 7.477130  | 1.222311  | -1.767381 |
| 69 | 6 | 0 | 6.304691  | 0.505648  | -2.000767 |
| 70 | 6 | 0 | 5.886959  | -0.477542 | -1.097641 |
| 71 | 6 | 0 | 6.656716  | -0.745640 | 0.038065  |
| 72 | 6 | 0 | 7.829440  | -0.028198 | 0.272917  |
| 73 | 6 | 0 | 8.241221  | 0.957030  | -0.627571 |
| 74 | 6 | 0 | 4.646716  | -1.282912 | -1.365620 |
| 75 | 8 | 0 | 4.431435  | -2.332827 | -0.679649 |
| 76 | 1 | 0 | 4.335451  | -1.257371 | -2.423028 |
| 77 | 1 | 0 | 7.796471  | 1.985062  | -2.472643 |
| 78 | 1 | 0 | 5.702938  | 0.713862  | -2.883357 |
| 79 | 1 | 0 | 6.327279  | -1.525669 | 0.716890  |
| 80 | 1 | 0 | 8.425715  | -0.240045 | 1.156723  |
| 81 | 1 | 0 | 9.156292  | 1.514370  | -0.444858 |

E<sub>ZPE</sub>: B3LYP/6-31G\* = -2820.38783 (a.u.)

Gsol: B3LYP/6-311++G\*\*/(SMD,M06-2X/6-31G\*,CH2Cl2) = -2821.06461 (a.u.)

### Int<sub>23</sub>

Standard orientation:

| Center Number | Atomic Number | Atomic Type | Coordinates (Angstroms) |           |           |
|---------------|---------------|-------------|-------------------------|-----------|-----------|
|               |               |             | X                       | Y         | Z         |
| 1             | 6             | 0           | -1.503140               | -3.589262 | -0.052348 |
| 2             | 6             | 0           | -2.836601               | -3.422519 | 0.390056  |
| 3             | 6             | 0           | -3.375072               | -2.097118 | 0.495480  |
| 4             | 6             | 0           | -2.572425               | -0.965287 | 0.119321  |
| 5             | 6             | 0           | -1.234151               | -1.164588 | -0.229235 |
| 6             | 6             | 0           | -0.717586               | -2.498120 | -0.331719 |
| 7             | 6             | 0           | -3.133419               | 0.418281  | 0.154363  |
| 8             | 6             | 0           | -4.261557               | 0.797519  | -0.652740 |
| 9             | 6             | 0           | -4.837558               | 2.103704  | -0.500263 |
| 10            | 6             | 0           | -4.258968               | 3.009805  | 0.428565  |
| 11            | 6             | 0           | -3.138253               | 2.665307  | 1.138644  |
| 12            | 6             | 0           | -2.554816               | 1.378859  | 0.983799  |
| 13            | 6             | 0           | -4.698309               | -1.964867 | 1.006096  |
| 14            | 6             | 0           | -5.445316               | -3.068439 | 1.353222  |
| 15            | 6             | 0           | -4.919887               | -4.374240 | 1.209269  |
| 16            | 6             | 0           | -3.638155               | -4.541883 | 0.740403  |
| 17            | 6             | 0           | -4.828080               | -0.063161 | -1.635656 |
| 18            | 6             | 0           | -5.907682               | 0.329923  | -2.396041 |
| 19            | 6             | 0           | -6.490679               | 1.605959  | -2.217932 |
| 20            | 6             | 0           | -5.958911               | 2.471482  | -1.289429 |
| 21            | 1             | 0           | -1.095331               | -4.590567 | -0.161816 |
| 22            | 1             | 0           | -3.211146               | -5.537225 | 0.639758  |
| 23            | 1             | 0           | -5.523346               | -5.236289 | 1.479790  |
| 24            | 1             | 0           | -6.449322               | -2.933530 | 1.746675  |
| 25            | 1             | 0           | -5.115390               | -0.973064 | 1.132478  |

|    |    |   |           |           |           |
|----|----|---|-----------|-----------|-----------|
| 26 | 1  | 0 | -4.389664 | -1.042270 | -1.792698 |
| 27 | 1  | 0 | -6.313021 | -0.347437 | -3.143284 |
| 28 | 1  | 0 | -7.346212 | 1.901748  | -2.819044 |
| 29 | 1  | 0 | -6.385527 | 3.462665  | -1.151038 |
| 30 | 1  | 0 | -4.708542 | 3.992339  | 0.553619  |
| 31 | 1  | 0 | -2.664362 | 3.355535  | 1.829448  |
| 32 | 7  | 0 | 0.649932  | -2.687140 | -0.692662 |
| 33 | 8  | 0 | -0.398203 | -0.143072 | -0.492524 |
| 34 | 8  | 0 | -1.417480 | 1.109205  | 1.673265  |
| 35 | 22 | 0 | 0.194701  | 1.158323  | 0.748685  |
| 36 | 8  | 0 | 0.242453  | 2.861511  | 0.225918  |
| 37 | 8  | 0 | 1.297110  | 0.624457  | 2.032743  |
| 38 | 6  | 0 | 1.564596  | -3.511838 | -0.051142 |
| 39 | 6  | 0 | 2.753203  | -3.337810 | -0.706891 |
| 40 | 7  | 0 | 2.593014  | -2.432432 | -1.736369 |
| 41 | 6  | 0 | 1.325435  | -2.065692 | -1.697992 |
| 42 | 1  | 0 | 1.280823  | -4.107924 | 0.801943  |
| 43 | 1  | 0 | 3.709168  | -3.798684 | -0.502592 |
| 44 | 1  | 0 | 0.854933  | -1.347770 | -2.350518 |
| 45 | 6  | 0 | 2.498152  | 0.558582  | 2.780479  |
| 46 | 6  | 0 | 2.462291  | 1.608887  | 3.891479  |
| 47 | 6  | 0 | 2.669969  | -0.863764 | 3.313953  |
| 48 | 1  | 0 | 3.329598  | 0.784277  | 2.095766  |
| 49 | 6  | 0 | 0.654769  | 3.979007  | -0.537502 |
| 50 | 6  | 0 | -0.382793 | 4.256743  | -1.626038 |
| 51 | 6  | 0 | 0.866666  | 5.171626  | 0.396321  |
| 52 | 1  | 0 | 1.614030  | 3.722888  | -1.013005 |
| 53 | 1  | 0 | 1.629846  | 1.409642  | 4.575191  |
| 54 | 1  | 0 | 3.395969  | 1.595531  | 4.465941  |
| 55 | 1  | 0 | 2.328749  | 2.611120  | 3.470579  |
| 56 | 1  | 0 | 3.614469  | -0.957629 | 3.862588  |
| 57 | 1  | 0 | 1.846234  | -1.117197 | 3.990653  |
| 58 | 1  | 0 | 2.674753  | -1.582142 | 2.488002  |
| 59 | 1  | 0 | -0.075192 | 5.107160  | -2.245938 |
| 60 | 1  | 0 | -0.502776 | 3.381330  | -2.272426 |
| 61 | 1  | 0 | -1.354924 | 4.483365  | -1.175289 |
| 62 | 1  | 0 | -0.074714 | 5.444024  | 0.886295  |
| 63 | 1  | 0 | 1.599877  | 4.926966  | 1.172146  |
| 64 | 1  | 0 | 1.231050  | 6.040732  | -0.163809 |
| 65 | 1  | 0 | 3.598067  | -1.302982 | -2.634411 |
| 66 | 7  | 0 | 2.168719  | 1.007056  | -0.644495 |
| 67 | 6  | 0 | 3.119910  | 0.786789  | -1.267170 |
| 68 | 6  | 0 | 7.716824  | -0.601746 | 0.371603  |
| 69 | 6  | 0 | 6.941311  | 0.514615  | 0.693827  |
| 70 | 6  | 0 | 5.835989  | 0.847096  | -0.088773 |
| 71 | 6  | 0 | 5.495955  | 0.064661  | -1.198652 |
| 72 | 6  | 0 | 6.276852  | -1.045491 | -1.524164 |
| 73 | 6  | 0 | 7.382808  | -1.377825 | -0.738259 |
| 74 | 6  | 0 | 4.314420  | 0.448185  | -2.102789 |
| 75 | 8  | 0 | 3.980103  | -0.489252 | -3.080104 |
| 76 | 1  | 0 | 4.574468  | 1.372573  | -2.638284 |
| 77 | 1  | 0 | 8.577421  | -0.861822 | 0.981817  |
| 78 | 1  | 0 | 7.196583  | 1.127383  | 1.554148  |
| 79 | 1  | 0 | 5.238745  | 1.719908  | 0.167714  |
| 80 | 1  | 0 | 6.018341  | -1.636627 | -2.395975 |
| 81 | 1  | 0 | 7.984653  | -2.244608 | -0.998061 |

E<sub>ZPE</sub>: B3LYP/6-31G\* = -2820.41503 (a.u.)

Gsol: B3LYP/6-311++G\*\*/(SMD,M06-2X/6-31G\*,CH2Cl2) = -2821.09137 (a.u.)

#### Int<sub>24</sub>

Standard orientation:

| Center<br>Number | Atomic<br>Number | Atomic<br>Type | Coordinates (Angstroms) |           |           |
|------------------|------------------|----------------|-------------------------|-----------|-----------|
|                  |                  |                | X                       | Y         | Z         |
| 1                | 7                | 0              | 2.373842                | -0.144767 | 0.126971  |
| 2                | 6                | 0              | 3.302699                | -0.613490 | -0.381744 |
| 3                | 6                | 0              | -2.550880               | -3.295752 | -0.636474 |
| 4                | 6                | 0              | -3.825317               | -2.756241 | -0.342965 |



|    |    |   |           |           |           |
|----|----|---|-----------|-----------|-----------|
| 5  | 6  | 0 | -3.941814 | -1.352818 | -0.069801 |
| 6  | 6  | 0 | -2.776903 | -0.512561 | -0.126899 |
| 7  | 6  | 0 | -1.523694 | -1.097754 | -0.325432 |
| 8  | 6  | 0 | -1.431535 | -2.500540 | -0.607904 |
| 9  | 6  | 0 | -2.884011 | 0.962774  | 0.078300  |
| 10 | 6  | 0 | -3.670800 | 1.791856  | -0.794625 |
| 11 | 6  | 0 | -3.831003 | 3.187071  | -0.496086 |
| 12 | 6  | 0 | -3.182700 | 3.727969  | 0.646664  |
| 13 | 6  | 0 | -2.376532 | 2.945033  | 1.431453  |
| 14 | 6  | 0 | -2.201163 | 1.566261  | 1.134185  |
| 15 | 6  | 0 | -5.230002 | -0.856858 | 0.281811  |
| 16 | 6  | 0 | -6.328304 | -1.686347 | 0.327559  |
| 17 | 6  | 0 | -6.210928 | -3.062522 | 0.020102  |
| 18 | 6  | 0 | -4.980231 | -3.582663 | -0.304829 |
| 19 | 6  | 0 | -4.285610 | 1.296071  | -1.979654 |
| 20 | 6  | 0 | -5.029829 | 2.116994  | -2.798500 |
| 21 | 6  | 0 | -5.209503 | 3.483435  | -2.481647 |
| 22 | 6  | 0 | -4.616084 | 4.001900  | -1.353325 |
| 23 | 1  | 0 | -2.458204 | -4.351058 | -0.878476 |
| 24 | 1  | 0 | -4.868007 | -4.641376 | -0.527728 |
| 25 | 1  | 0 | -7.087389 | -3.703777 | 0.053017  |
| 26 | 1  | 0 | -7.296101 | -1.279031 | 0.607748  |
| 27 | 1  | 0 | -5.338744 | 0.192149  | 0.529681  |
| 28 | 1  | 0 | -4.152479 | 0.253163  | -2.244392 |
| 29 | 1  | 0 | -5.480545 | 1.709886  | -3.699966 |
| 30 | 1  | 0 | -5.804196 | 4.119023  | -3.132126 |
| 31 | 1  | 0 | -4.731213 | 5.054357  | -1.103029 |
| 32 | 1  | 0 | -3.320663 | 4.781510  | 0.879451  |
| 33 | 1  | 0 | -1.849383 | 3.348137  | 2.290425  |
| 34 | 7  | 0 | -0.147675 | -3.083131 | -0.830547 |
| 35 | 8  | 0 | -0.381119 | -0.388571 | -0.279444 |
| 36 | 8  | 0 | -1.350073 | 0.851359  | 1.911492  |
| 37 | 22 | 0 | 0.345137  | 0.482532  | 1.238846  |
| 38 | 8  | 0 | 1.009720  | 2.124036  | 1.055899  |
| 39 | 8  | 0 | 0.977223  | -0.531286 | 2.559718  |
| 40 | 6  | 0 | 0.331794  | -4.258695 | -0.269386 |
| 41 | 6  | 0 | 1.606351  | -4.410363 | -0.744154 |
| 42 | 7  | 0 | 1.922879  | -3.361750 | -1.584811 |
| 43 | 6  | 0 | 0.851549  | -2.590076 | -1.612829 |
| 44 | 1  | 0 | -0.267784 | -4.839740 | 0.413569  |
| 45 | 1  | 0 | 2.312019  | -5.202239 | -0.535841 |
| 46 | 1  | 0 | 0.752998  | -1.664320 | -2.156661 |
| 47 | 6  | 0 | 2.007761  | -0.904767 | 3.457072  |
| 48 | 6  | 0 | 2.092212  | 0.111754  | 4.596470  |
| 49 | 6  | 0 | 1.737713  | -2.327276 | 3.947959  |
| 50 | 1  | 0 | 2.956109  | -0.894591 | 2.897428  |
| 51 | 6  | 0 | 1.805060  | 3.126659  | 0.445539  |
| 52 | 6  | 0 | 1.115152  | 3.621983  | -0.826103 |
| 53 | 6  | 0 | 2.049460  | 4.245242  | 1.458856  |
| 54 | 1  | 0 | 2.768633  | 2.668313  | 0.177424  |
| 55 | 1  | 0 | 1.152355  | 0.131111  | 5.159227  |
| 56 | 1  | 0 | 2.905736  | -0.145511 | 5.284821  |
| 57 | 1  | 0 | 2.276963  | 1.116162  | 4.200913  |
| 58 | 1  | 0 | 2.541848  | -2.666873 | 4.611331  |
| 59 | 1  | 0 | 0.791546  | -2.365396 | 4.498971  |
| 60 | 1  | 0 | 1.670563  | -3.016251 | 3.099708  |
| 61 | 1  | 0 | 1.720970  | 4.391348  | -1.319075 |
| 62 | 1  | 0 | 0.967132  | 2.796103  | -1.529563 |
| 63 | 1  | 0 | 0.134565  | 4.046763  | -0.585422 |
| 64 | 1  | 0 | 1.100871  | 4.711917  | 1.746553  |
| 65 | 1  | 0 | 2.526712  | 3.849414  | 2.361408  |
| 66 | 1  | 0 | 2.701472  | 5.015959  | 1.031602  |
| 67 | 1  | 0 | 3.368552  | -2.498214 | -2.136211 |
| 68 | 6  | 0 | 7.619599  | 1.633682  | -1.562150 |
| 69 | 6  | 0 | 7.429484  | 1.007744  | -0.328357 |
| 70 | 6  | 0 | 6.413774  | 0.064293  | -0.175091 |
| 71 | 6  | 0 | 5.581412  | -0.254492 | -1.252759 |
| 72 | 6  | 0 | 5.771119  | 0.371734  | -2.486985 |
| 73 | 6  | 0 | 6.791593  | 1.311739  | -2.639001 |
| 74 | 6  | 0 | 4.458185  | -1.272116 | -1.075014 |

|    |   |   |          |           |           |
|----|---|---|----------|-----------|-----------|
| 75 | 8 | 0 | 4.052893 | -1.787824 | -2.305761 |
| 76 | 1 | 0 | 4.800194 | -2.060281 | -0.382781 |
| 77 | 1 | 0 | 8.413876 | 2.365097  | -1.684361 |
| 78 | 1 | 0 | 8.075514 | 1.247301  | 0.511772  |
| 79 | 1 | 0 | 6.272973 | -0.428591 | 0.784923  |
| 80 | 1 | 0 | 5.128880 | 0.104576  | -3.318639 |
| 81 | 1 | 0 | 6.940303 | 1.791926  | -3.602401 |

E<sub>ZPE</sub>: B3LYP/6-31G\* = -2820.41543 (a.u.)  
Gsol: B3LYP/6-311++G\*\*/(SMD,M06-2X/6-31G\*,CH2Cl2) = -2821.09300 (a.u.)

**Int<sub>25</sub>**

Standard orientation:

| Center Number | Atomic Number | Atomic Type | Coordinates (Angstroms) |           |           |
|---------------|---------------|-------------|-------------------------|-----------|-----------|
|               |               |             | X                       | Y         | Z         |
| 1             | 6             | 0           | -1.267928               | -3.563322 | 0.665052  |
| 2             | 6             | 0           | -2.672208               | -3.412027 | 0.744825  |
| 3             | 6             | 0           | -3.245686               | -2.115118 | 0.529950  |
| 4             | 6             | 0           | -2.399672               | -1.003853 | 0.185777  |
| 5             | 6             | 0           | -1.012837               | -1.177216 | 0.187134  |
| 6             | 6             | 0           | -0.461067               | -2.481540 | 0.413196  |
| 7             | 6             | 0           | -2.988832               | 0.329956  | -0.135581 |
| 8             | 6             | 0           | -3.908296               | 0.505313  | -1.228452 |
| 9             | 6             | 0           | -4.550572               | 1.774536  | -1.420677 |
| 10            | 6             | 0           | -4.241652               | 2.845940  | -0.539930 |
| 11            | 6             | 0           | -3.306507               | 2.691692  | 0.450173  |
| 12            | 6             | 0           | -2.653791               | 1.442987  | 0.635715  |
| 13            | 6             | 0           | -4.653615               | -1.983886 | 0.702753  |
| 14            | 6             | 0           | -5.438690               | -3.066624 | 1.031009  |
| 15            | 6             | 0           | -4.868648               | -4.349815 | 1.205426  |
| 16            | 6             | 0           | -3.510191               | -4.512490 | 1.068718  |
| 17            | 6             | 0           | -4.194898               | -0.527863 | -2.165396 |
| 18            | 6             | 0           | -5.077476               | -0.328491 | -3.204445 |
| 19            | 6             | 0           | -5.732075               | 0.914203  | -3.368356 |
| 20            | 6             | 0           | -5.466311               | 1.941894  | -2.492463 |
| 21            | 1             | 0           | -0.820151               | -4.537409 | 0.842781  |
| 22            | 1             | 0           | -3.051063               | -5.486957 | 1.219215  |
| 23            | 1             | 0           | -5.501141               | -5.196106 | 1.458749  |
| 24            | 1             | 0           | -6.508910               | -2.931635 | 1.163150  |
| 25            | 1             | 0           | -5.108485               | -1.007948 | 0.584172  |
| 26            | 1             | 0           | -3.696551               | -1.485001 | -2.061212 |
| 27            | 1             | 0           | -5.269637               | -1.134775 | -3.907616 |
| 28            | 1             | 0           | -6.431339               | 1.056648  | -4.187793 |
| 29            | 1             | 0           | -5.948704               | 2.909399  | -2.613813 |
| 30            | 1             | 0           | -4.745187               | 3.800336  | -0.676515 |
| 31            | 1             | 0           | -3.034456               | 3.508215  | 1.111503  |
| 32            | 7             | 0           | 0.954020                | -2.662666 | 0.345080  |
| 33            | 8             | 0           | -0.158290               | -0.164050 | -0.046124 |
| 34            | 8             | 0           | -1.690839               | 1.364010  | 1.591400  |
| 35            | 22            | 0           | 0.068091                | 1.391883  | 0.991472  |
| 36            | 8             | 0           | 0.149637                | 2.990772  | 0.207208  |
| 37            | 8             | 0           | 0.946039                | 1.134564  | 2.526284  |
| 38            | 6             | 0           | 1.633550                | -3.543912 | -0.483432 |
| 39            | 6             | 0           | 2.964102                | -3.341266 | -0.236667 |
| 40            | 7             | 0           | 3.119876                | -2.364108 | 0.725567  |
| 41            | 6             | 0           | 1.897928                | -1.981998 | 1.049935  |
| 42            | 1             | 0           | 1.105468                | -4.192299 | -1.165075 |
| 43            | 1             | 0           | 3.816058                | -3.823676 | -0.694009 |
| 44            | 1             | 0           | 1.642354                | -1.217292 | 1.767728  |
| 45            | 6             | 0           | 2.000888                | 1.455508  | 3.424930  |
| 46            | 6             | 0           | 2.154442                | 2.971851  | 3.541590  |
| 47            | 6             | 0           | 1.714127                | 0.787799  | 4.769871  |
| 48            | 1             | 0           | 2.924200                | 1.030368  | 3.002728  |
| 49            | 6             | 0           | 0.623342                | 3.899756  | -0.772153 |
| 50            | 6             | 0           | -0.128831               | 3.677603  | -2.084879 |
| 51            | 6             | 0           | 0.470104                | 5.323883  | -0.236822 |
| 52            | 1             | 0           | 1.691769                | 3.688330  | -0.929381 |
| 53            | 1             | 0           | 1.236409                | 3.417647  | 3.941494  |

|    |   |   |           |           |           |
|----|---|---|-----------|-----------|-----------|
| 54 | 1 | 0 | 2.983467  | 3.223979  | 4.212745  |
| 55 | 1 | 0 | 2.355383  | 3.416716  | 2.561522  |
| 56 | 1 | 0 | 2.537404  | 0.968450  | 5.470482  |
| 57 | 1 | 0 | 0.790594  | 1.186365  | 5.204099  |
| 58 | 1 | 0 | 1.596783  | -0.293616 | 4.647096  |
| 59 | 1 | 0 | 0.234062  | 4.364921  | -2.858245 |
| 60 | 1 | 0 | 0.012095  | 2.651444  | -2.439985 |
| 61 | 1 | 0 | -1.201657 | 3.845537  | -1.941518 |
| 62 | 1 | 0 | -0.587542 | 5.555695  | -0.069228 |
| 63 | 1 | 0 | 1.002060  | 5.437159  | 0.713410  |
| 64 | 1 | 0 | 0.876341  | 6.049605  | -0.951002 |
| 65 | 1 | 0 | 4.434243  | -1.238690 | 1.079291  |
| 66 | 6 | 0 | 6.231935  | -1.375905 | -3.637511 |
| 67 | 6 | 0 | 6.753022  | -1.791589 | -2.410709 |
| 68 | 6 | 0 | 6.285230  | -1.230792 | -1.221777 |
| 69 | 6 | 0 | 5.288364  | -0.250601 | -1.252812 |
| 70 | 6 | 0 | 4.768112  | 0.165258  | -2.482240 |
| 71 | 6 | 0 | 5.238510  | -0.396158 | -3.670238 |
| 72 | 6 | 0 | 4.850872  | 0.384944  | 0.071674  |
| 73 | 8 | 0 | 5.014700  | -0.427570 | 1.200994  |
| 74 | 1 | 0 | 5.462917  | 1.280600  | 0.250513  |
| 75 | 1 | 0 | 6.595460  | -1.814987 | -4.562589 |
| 76 | 1 | 0 | 7.526233  | -2.554571 | -2.377270 |
| 77 | 1 | 0 | 6.682117  | -1.549695 | -0.263615 |
| 78 | 1 | 0 | 3.986928  | 0.920855  | -2.518679 |
| 79 | 1 | 0 | 4.822251  | -0.071333 | -4.619868 |
| 80 | 7 | 0 | 2.327804  | 1.192214  | 0.081163  |
| 81 | 6 | 0 | 3.436980  | 0.865075  | 0.015742  |

E<sub>ZPE</sub>: B3LYP/6-31G\* = -2820.41449 (a.u.)  
Gsol: B3LYP/6-311++G\*\*/(SMD,M06-2X/6-31G\*,CH2Cl2) = -2821.08708 (a.u.)

### Int<sub>26</sub>

Standard orientation:

| Center Number | Atomic Number | Atomic Type | Coordinates (Angstroms) |           |           |
|---------------|---------------|-------------|-------------------------|-----------|-----------|
|               |               |             | X                       | Y         | Z         |
| 1             | 6             | 0           | -2.413285               | -3.444742 | -0.301542 |
| 2             | 6             | 0           | -3.694830               | -2.973412 | 0.067232  |
| 3             | 6             | 0           | -3.886070               | -1.566820 | 0.271362  |
| 4             | 6             | 0           | -2.797195               | -0.653633 | 0.048006  |
| 5             | 6             | 0           | -1.527940               | -1.163502 | -0.240984 |
| 6             | 6             | 0           | -1.359335               | -2.574838 | -0.434831 |
| 7             | 6             | 0           | -3.009934               | 0.820561  | 0.154908  |
| 8             | 6             | 0           | -3.957106               | 1.508179  | -0.682202 |
| 9             | 6             | 0           | -4.228740               | 2.899287  | -0.454783 |
| 10            | 6             | 0           | -3.531465               | 3.579558  | 0.579759  |
| 11            | 6             | 0           | -2.574287               | 2.936031  | 1.320022  |
| 12            | 6             | 0           | -2.287401               | 1.563232  | 1.089131  |
| 13            | 6             | 0           | -5.166258               | -1.138856 | 0.726795  |
| 14            | 6             | 0           | -6.190719               | -2.036311 | 0.930401  |
| 15            | 6             | 0           | -6.003478               | -3.418074 | 0.690011  |
| 16            | 6             | 0           | -4.775252               | -3.872944 | 0.271771  |
| 17            | 6             | 0           | -4.629007               | 0.873776  | -1.765517 |
| 18            | 6             | 0           | -5.528953               | 1.559699  | -2.551648 |
| 19            | 6             | 0           | -5.816756               | 2.921244  | -2.300888 |
| 20            | 6             | 0           | -5.172822               | 3.572604  | -1.273695 |
| 21            | 1             | 0           | -2.251984               | -4.510129 | -0.442541 |
| 22            | 1             | 0           | -4.605660               | -4.933917 | 0.102552  |
| 23            | 1             | 0           | -6.822600               | -4.113853 | 0.849186  |
| 24            | 1             | 0           | -7.153302               | -1.678448 | 1.285925  |
| 25            | 1             | 0           | -5.327392               | -0.086772 | 0.928342  |
| 26            | 1             | 0           | -4.415306               | -0.167369 | -1.979187 |
| 27            | 1             | 0           | -6.020074               | 1.048673  | -3.375754 |
| 28            | 1             | 0           | -6.533784               | 3.449357  | -2.923535 |
| 29            | 1             | 0           | -5.370279               | 4.624196  | -1.077079 |
| 30            | 1             | 0           | -3.754632               | 4.628334  | 0.762373  |
| 31            | 1             | 0           | -2.008647               | 3.448008  | 2.092064  |
| 32            | 7             | 0           | -0.077038               | -3.084805 | -0.806114 |

|    |    |   |           |           |           |
|----|----|---|-----------|-----------|-----------|
| 33 | 8  | 0 | -0.446131 | -0.375950 | -0.378252 |
| 34 | 8  | 0 | -1.287121 | 0.992732  | 1.808686  |
| 35 | 22 | 0 | 0.332191  | 0.741051  | 0.928092  |
| 36 | 8  | 0 | 0.777045  | 2.419485  | 0.523401  |
| 37 | 8  | 0 | 1.251942  | -0.126317 | 2.191845  |
| 38 | 6  | 0 | 0.201539  | -3.884131 | -1.904865 |
| 39 | 6  | 0 | 1.550474  | -4.112338 | -1.871968 |
| 40 | 7  | 0 | 2.107862  | -3.477980 | -0.779706 |
| 41 | 6  | 0 | 1.104709  | -2.875606 | -0.165244 |
| 42 | 1  | 0 | -0.574383 | -4.181050 | -2.593050 |
| 43 | 1  | 0 | 2.152631  | -4.688747 | -2.560147 |
| 44 | 1  | 0 | 1.178888  | -2.275043 | 0.728496  |
| 45 | 6  | 0 | 2.443634  | -0.300213 | 2.948421  |
| 46 | 6  | 0 | 2.989486  | 1.054944  | 3.397732  |
| 47 | 6  | 0 | 2.141807  | -1.232233 | 4.122184  |
| 48 | 1  | 0 | 3.177912  | -0.783531 | 2.286016  |
| 49 | 6  | 0 | 1.351876  | 3.390047  | -0.337403 |
| 50 | 6  | 0 | 0.381949  | 3.701071  | -1.477849 |
| 51 | 6  | 0 | 1.711643  | 4.626445  | 0.486752  |
| 52 | 1  | 0 | 2.272352  | 2.956099  | -0.755236 |
| 53 | 1  | 0 | 2.265253  | 1.560144  | 4.047201  |
| 54 | 1  | 0 | 3.924839  | 0.927333  | 3.954619  |
| 55 | 1  | 0 | 3.186465  | 1.697772  | 2.533766  |
| 56 | 1  | 0 | 3.053555  | -1.433380 | 4.696252  |
| 57 | 1  | 0 | 1.401352  | -0.777061 | 4.789116  |
| 58 | 1  | 0 | 1.741292  | -2.186318 | 3.764845  |
| 59 | 1  | 0 | 0.819106  | 4.433307  | -2.167013 |
| 60 | 1  | 0 | 0.148103  | 2.791885  | -2.041561 |
| 61 | 1  | 0 | -0.554602 | 4.107736  | -1.081405 |
| 62 | 1  | 0 | 0.808751  | 5.072394  | 0.918569  |
| 63 | 1  | 0 | 2.389609  | 4.360502  | 1.304266  |
| 64 | 1  | 0 | 2.204126  | 5.377509  | -0.141864 |
| 65 | 1  | 0 | 3.724196  | -2.859492 | -0.403519 |
| 66 | 7  | 0 | 2.302792  | 0.229339  | -0.376183 |
| 67 | 6  | 0 | 3.243318  | -0.341144 | -0.739047 |
| 68 | 6  | 0 | 7.048144  | 1.388043  | -2.125089 |
| 69 | 6  | 0 | 5.893021  | 0.607298  | -2.127243 |
| 70 | 6  | 0 | 5.685760  | -0.346069 | -1.124405 |
| 71 | 6  | 0 | 6.641693  | -0.517933 | -0.121253 |
| 72 | 6  | 0 | 7.799630  | 0.262526  | -0.124188 |
| 73 | 6  | 0 | 8.004505  | 1.216870  | -1.121422 |
| 74 | 6  | 0 | 4.414060  | -1.189607 | -1.128964 |
| 75 | 8  | 0 | 4.512834  | -2.263040 | -0.240216 |
| 76 | 1  | 0 | 4.209579  | -1.523547 | -2.159652 |
| 77 | 1  | 0 | 7.203783  | 2.124041  | -2.909098 |
| 78 | 1  | 0 | 5.152824  | 0.738805  | -2.914273 |
| 79 | 1  | 0 | 6.476891  | -1.269543 | 0.642254  |
| 80 | 1  | 0 | 8.543536  | 0.121762  | 0.655397  |
| 81 | 1  | 0 | 8.907043  | 1.821998  | -1.120766 |

E<sub>ZPE</sub>: B3LYP/6-31G\* = -2820.41541 (a.u.)

Gsol: B3LYP/6-311++G\*\*/(SMD,M06-2X/6-31G\*,CH2Cl2) = -2821.08960 (a.u.)

#### Ts14 and ts16 with different aldehydes

##### TS14<sub>4-ClC6H4</sub>

Standard orientation:

| Center Number | Atomic Number | Atomic Type | Coordinates (Angstroms) |           |           |
|---------------|---------------|-------------|-------------------------|-----------|-----------|
|               |               |             | X                       | Y         | Z         |
| 1             | 7             | 0           | 1.815434                | -0.302213 | 0.533932  |
| 2             | 6             | 0           | 2.859458                | -0.703148 | 0.191927  |
| 3             | 6             | 0           | -3.151579               | -3.127953 | -0.940553 |
| 4             | 6             | 0           | -4.408524               | -2.505324 | -0.769994 |
| 5             | 6             | 0           | -4.454184               | -1.111389 | -0.430702 |
| 6             | 6             | 0           | -3.237423               | -0.356054 | -0.316287 |
| 7             | 6             | 0           | -2.008586               | -1.019823 | -0.401430 |
| 8             | 6             | 0           | -1.995551               | -2.415653 | -0.732904 |
| 9             | 6             | 0           | -3.260972               | 1.113622  | -0.060238 |

|    |    |   |           |           |           |
|----|----|---|-----------|-----------|-----------|
| 10 | 6  | 0 | -3.904682 | 2.031733  | -0.960994 |
| 11 | 6  | 0 | -3.990690 | 3.422105  | -0.613185 |
| 12 | 6  | 0 | -3.406666 | 3.867080  | 0.603453  |
| 13 | 6  | 0 | -2.729424 | 2.996903  | 1.417036  |
| 14 | 6  | 0 | -2.627959 | 1.619470  | 1.076376  |
| 15 | 6  | 0 | -5.736913 | -0.536689 | -0.196508 |
| 16 | 6  | 0 | -6.888462 | -1.279862 | -0.325145 |
| 17 | 6  | 0 | -6.835203 | -2.643582 | -0.701580 |
| 18 | 6  | 0 | -5.615998 | -3.240913 | -0.914883 |
| 19 | 6  | 0 | -4.442093 | 1.633648  | -2.218272 |
| 20 | 6  | 0 | -5.049740 | 2.540524  | -3.059211 |
| 21 | 6  | 0 | -5.161391 | 3.902032  | -2.694618 |
| 22 | 6  | 0 | -4.636053 | 4.327358  | -1.495632 |
| 23 | 1  | 0 | -3.110289 | -4.173748 | -1.233118 |
| 24 | 1  | 0 | -5.554500 | -4.292413 | -1.186708 |
| 25 | 1  | 0 | -7.753315 | -3.214584 | -0.807730 |
| 26 | 1  | 0 | -7.850874 | -0.814067 | -0.131088 |
| 27 | 1  | 0 | -5.797516 | 0.503322  | 0.099868  |
| 28 | 1  | 0 | -4.357932 | 0.596309  | -2.522290 |
| 29 | 1  | 0 | -5.443257 | 2.205297  | -4.015471 |
| 30 | 1  | 0 | -5.648241 | 4.606640  | -3.363346 |
| 31 | 1  | 0 | -4.697242 | 5.374548  | -1.207042 |
| 32 | 1  | 0 | -3.487255 | 4.918634  | 0.869925  |
| 33 | 1  | 0 | -2.249482 | 3.326393  | 2.332995  |
| 34 | 7  | 0 | -0.732809 | -3.090830 | -0.825803 |
| 35 | 8  | 0 | -0.831551 | -0.410024 | -0.224154 |
| 36 | 8  | 0 | -1.907334 | 0.814525  | 1.885509  |
| 37 | 22 | 0 | -0.148616 | 0.354307  | 1.417756  |
| 38 | 8  | 0 | 0.586528  | 1.977169  | 1.456982  |
| 39 | 8  | 0 | 0.208271  | -0.741109 | 2.778158  |
| 40 | 6  | 0 | -0.468420 | -4.389648 | -0.402309 |
| 41 | 6  | 0 | 0.854385  | -4.623627 | -0.636820 |
| 42 | 7  | 0 | 1.381470  | -3.480772 | -1.198670 |
| 43 | 6  | 0 | 0.416195  | -2.572496 | -1.297658 |
| 44 | 1  | 0 | -1.234057 | -5.002467 | 0.043756  |
| 45 | 1  | 0 | 1.454815  | -5.498717 | -0.444525 |
| 46 | 1  | 0 | 0.535030  | -1.563781 | -1.650623 |
| 47 | 6  | 0 | 1.158714  | -1.131236 | 3.757224  |
| 48 | 6  | 0 | 1.169753  | -0.115583 | 4.900430  |
| 49 | 6  | 0 | 0.819787  | -2.545585 | 4.228617  |
| 50 | 1  | 0 | 2.146339  | -1.140643 | 3.272494  |
| 51 | 6  | 0 | 1.608067  | 2.881516  | 1.063969  |
| 52 | 6  | 0 | 1.168811  | 3.618954  | -0.201076 |
| 53 | 6  | 0 | 1.903175  | 3.827586  | 2.228162  |
| 54 | 1  | 0 | 2.506868  | 2.289059  | 0.842624  |
| 55 | 1  | 0 | 0.188413  | -0.078100 | 5.386431  |
| 56 | 1  | 0 | 1.921062  | -0.387027 | 5.651293  |
| 57 | 1  | 0 | 1.404035  | 0.884685  | 4.521588  |
| 58 | 1  | 0 | 1.558715  | -2.897628 | 4.958013  |
| 59 | 1  | 0 | -0.169783 | -2.563357 | 4.698676  |
| 60 | 1  | 0 | 0.811141  | -3.238983 | 3.381070  |
| 61 | 1  | 0 | 1.947166  | 4.317109  | -0.530713 |
| 62 | 1  | 0 | 0.978230  | 2.907131  | -1.010908 |
| 63 | 1  | 0 | 0.247432  | 4.181466  | -0.014681 |
| 64 | 1  | 0 | 1.016068  | 4.421766  | 2.474734  |
| 65 | 1  | 0 | 2.197549  | 3.262059  | 3.118571  |
| 66 | 1  | 0 | 2.719031  | 4.512102  | 1.968325  |
| 67 | 1  | 0 | 2.422487  | -3.202785 | -1.397801 |
| 68 | 6  | 0 | 7.499937  | 0.791960  | -1.406727 |
| 69 | 6  | 0 | 7.257663  | 0.361688  | -0.101402 |
| 70 | 6  | 0 | 6.185028  | -0.494756 | 0.136025  |
| 71 | 6  | 0 | 5.360861  | -0.916412 | -0.911674 |
| 72 | 6  | 0 | 5.625684  | -0.478958 | -2.211878 |
| 73 | 6  | 0 | 6.694003  | 0.378996  | -2.467477 |
| 74 | 6  | 0 | 4.230659  | -1.877947 | -0.663534 |
| 75 | 8  | 0 | 3.677432  | -2.442897 | -1.658487 |
| 76 | 1  | 0 | 4.346791  | -2.438459 | 0.279919  |
| 77 | 17 | 0 | 8.854014  | 1.871732  | -1.719637 |
| 78 | 1  | 0 | 7.899817  | 0.690944  | 0.708552  |
| 79 | 1  | 0 | 5.983894  | -0.832771 | 1.150444  |

|    |   |   |          |           |           |
|----|---|---|----------|-----------|-----------|
| 80 | 1 | 0 | 4.990179 | -0.829599 | -3.018411 |
| 81 | 1 | 0 | 6.904569 | 0.721642  | -3.475083 |

-----  
 Ezpe: B3LYP/6-31G\* = -3279.99381 (a.u.)  
 Gsol: B3LYP/6-311++G\*\*/(SMD,M06-2X/6-31G\*,CH2Cl2) = -3280.70147 (a.u.)

**TS16**<sub>4-CIC6H4</sub>

Standard orientation:

| Center<br>Number | Atomic<br>Number | Atomic<br>Type | Coordinates (Angstroms) |           |           |
|------------------|------------------|----------------|-------------------------|-----------|-----------|
|                  |                  |                | X                       | Y         | Z         |
| 1                | 6                | 0              | -3.013883               | -3.383493 | -0.120866 |
| 2                | 6                | 0              | -4.264134               | -2.852912 | 0.269528  |
| 3                | 6                | 0              | -4.407609               | -1.429423 | 0.386146  |
| 4                | 6                | 0              | -3.306187               | -0.561144 | 0.071550  |
| 5                | 6                | 0              | -2.055780               | -1.118286 | -0.221019 |
| 6                | 6                | 0              | -1.950584               | -2.544196 | -0.344132 |
| 7                | 6                | 0              | -3.466748               | 0.921609  | 0.093751  |
| 8                | 6                | 0              | -4.414469               | 1.597097  | -0.750806 |
| 9                | 6                | 0              | -4.608088               | 3.012348  | -0.607217 |
| 10               | 6                | 0              | -3.834240               | 3.721802  | 0.350644  |
| 11               | 6                | 0              | -2.881161               | 3.080691  | 1.098185  |
| 12               | 6                | 0              | -2.670905               | 1.681360  | 0.952604  |
| 13               | 6                | 0              | -5.659925               | -0.935477 | 0.853865  |
| 14               | 6                | 0              | -6.699982               | -1.787069 | 1.150528  |
| 15               | 6                | 0              | -6.559702               | -3.187435 | 0.997596  |
| 16               | 6                | 0              | -5.360586               | -3.705419 | 0.570318  |
| 17               | 6                | 0              | -5.162024               | 0.929414  | -1.762329 |
| 18               | 6                | 0              | -6.060471               | 1.608123  | -2.556642 |
| 19               | 6                | 0              | -6.270176               | 2.996159  | -2.387456 |
| 20               | 6                | 0              | -5.551374               | 3.678575  | -1.432387 |
| 21               | 1                | 0              | -2.888766               | -4.459691 | -0.208302 |
| 22               | 1                | 0              | -5.226739               | -4.779913 | 0.466537  |
| 23               | 1                | 0              | -7.391668               | -3.846072 | 1.230470  |
| 24               | 1                | 0              | -7.639430               | -1.378520 | 1.513041  |
| 25               | 1                | 0              | -5.784050               | 0.132048  | 0.988903  |
| 26               | 1                | 0              | -5.008468               | -0.132935 | -1.915728 |
| 27               | 1                | 0              | -6.610571               | 1.070515  | -3.324805 |
| 28               | 1                | 0              | -6.985913               | 3.519016  | -3.015973 |
| 29               | 1                | 0              | -5.687713               | 4.749750  | -1.299954 |
| 30               | 1                | 0              | -3.996437               | 4.791013  | 0.467762  |
| 31               | 1                | 0              | -2.259972               | 3.613419  | 1.811043  |
| 32               | 7                | 0              | -0.701939               | -3.104515 | -0.778473 |
| 33               | 8                | 0              | -0.953150               | -0.391940 | -0.432246 |
| 34               | 8                | 0              | -1.683515               | 1.104005  | 1.670255  |
| 35               | 22               | 0              | -0.043583               | 0.739187  | 0.832109  |
| 36               | 8                | 0              | 0.470173                | 2.415776  | 0.497057  |
| 37               | 8                | 0              | 0.748624                | -0.157214 | 2.167670  |
| 38               | 6                | 0              | -0.538252               | -3.987760 | -1.839577 |
| 39               | 6                | 0              | 0.801751                | -4.198717 | -1.976556 |
| 40               | 7                | 0              | 1.437690                | -3.454144 | -1.005696 |
| 41               | 6                | 0              | 0.517282                | -2.801278 | -0.301437 |
| 42               | 1                | 0              | -1.384489               | -4.351967 | -2.398881 |
| 43               | 1                | 0              | 1.347504                | -4.806434 | -2.680946 |
| 44               | 1                | 0              | 0.715613                | -2.128638 | 0.516440  |
| 45               | 6                | 0              | 1.940713                | -0.207037 | 2.946920  |
| 46               | 6                | 0              | 2.129291                | 1.109293  | 3.701147  |
| 47               | 6                | 0              | 1.859235                | -1.412484 | 3.883102  |
| 48               | 1                | 0              | 2.778612                | -0.345787 | 2.248060  |
| 49               | 6                | 0              | 1.177589                | 3.324608  | -0.335070 |
| 50               | 6                | 0              | 0.354368                | 3.616845  | -1.589906 |
| 51               | 6                | 0              | 1.488992                | 4.584954  | 0.472591  |
| 52               | 1                | 0              | 2.119463                | 2.839108  | -0.626615 |
| 53               | 1                | 0              | 1.297333                | 1.274472  | 4.395194  |
| 54               | 1                | 0              | 3.063374                | 1.093531  | 4.274457  |
| 55               | 1                | 0              | 2.167058                | 1.950425  | 3.001396  |
| 56               | 1                | 0              | 2.779920                | -1.504765 | 4.470639  |
| 57               | 1                | 0              | 1.014675                | -1.303981 | 4.572602  |
| 58               | 1                | 0              | 1.722476                | -2.338378 | 3.314262  |

|    |    |   |           |           |           |
|----|----|---|-----------|-----------|-----------|
| 59 | 1  | 0 | 0.888891  | 4.311908  | -2.248203 |
| 60 | 1  | 0 | 0.163205  | 2.693426  | -2.146575 |
| 61 | 1  | 0 | -0.609516 | 4.061824  | -1.319190 |
| 62 | 1  | 0 | 0.561993  | 5.078862  | 0.784676  |
| 63 | 1  | 0 | 2.065761  | 4.336166  | 1.369455  |
| 64 | 1  | 0 | 2.073536  | 5.290738  | -0.129082 |
| 65 | 1  | 0 | 2.506790  | -3.234863 | -0.899056 |
| 66 | 7  | 0 | 1.754215  | 0.156046  | -0.384907 |
| 67 | 6  | 0 | 2.749325  | -0.239890 | -0.855000 |
| 68 | 6  | 0 | 7.090056  | 0.756030  | -1.692605 |
| 69 | 6  | 0 | 5.884488  | 0.101900  | -1.935057 |
| 70 | 6  | 0 | 5.411335  | -0.875502 | -1.054171 |
| 71 | 6  | 0 | 6.164615  | -1.203178 | 0.076201  |
| 72 | 6  | 0 | 7.372661  | -0.557788 | 0.334749  |
| 73 | 6  | 0 | 7.822947  | 0.418360  | -0.553752 |
| 74 | 6  | 0 | 4.131695  | -1.612771 | -1.336387 |
| 75 | 8  | 0 | 3.856030  | -2.648334 | -0.654032 |
| 76 | 1  | 0 | 3.832559  | -1.567393 | -2.396703 |
| 77 | 1  | 0 | 7.460232  | 1.515330  | -2.373192 |
| 78 | 1  | 0 | 5.300765  | 0.362804  | -2.815219 |
| 79 | 1  | 0 | 5.795997  | -1.977204 | 0.741322  |
| 80 | 1  | 0 | 7.962247  | -0.808836 | 1.210218  |
| 81 | 17 | 0 | 9.348184  | 1.237141  | -0.237228 |

E<sub>ZPE</sub>: B3LYP/6-31G\* = -3279.99364 (a.u.)  
 G<sub>sol</sub>: B3LYP/6-311++G\*\*/(SMD,M06-2X/6-31G\*,CH2Cl2) = -3280.69916 (a.u.)

**TS14**<sub>4-CH3C6H4</sub>

Standard orientation:

| Center Number | Atomic Number | Atomic Type | Coordinates (Angstroms) |           |           |
|---------------|---------------|-------------|-------------------------|-----------|-----------|
|               |               |             | X                       | Y         | Z         |
| 1             | 7             | 0           | 2.035559                | -0.130201 | 0.425311  |
| 2             | 6             | 0           | 3.082032                | -0.508055 | 0.064781  |
| 3             | 6             | 0           | -2.831998               | -3.249140 | -0.742298 |
| 4             | 6             | 0           | -4.111645               | -2.678853 | -0.556763 |
| 5             | 6             | 0           | -4.214121               | -1.273548 | -0.283223 |
| 6             | 6             | 0           | -3.032293               | -0.457440 | -0.247416 |
| 7             | 6             | 0           | -1.776200               | -1.066136 | -0.344552 |
| 8             | 6             | 0           | -1.705480               | -2.474355 | -0.610747 |
| 9             | 6             | 0           | -3.118014               | 1.019854  | -0.056705 |
| 10            | 6             | 0           | -3.833584               | 1.864721  | -0.974309 |
| 11            | 6             | 0           | -3.976588               | 3.263880  | -0.685542 |
| 12            | 6             | 0           | -3.377596               | 3.790653  | 0.490469  |
| 13            | 6             | 0           | -2.633259               | 2.991279  | 1.317896  |
| 14            | 6             | 0           | -2.473960               | 1.606194  | 1.034438  |
| 15            | 6             | 0           | -5.515166               | -0.749227 | -0.032334 |
| 16            | 6             | 0           | -6.632648               | -1.551476 | -0.083869 |
| 17            | 6             | 0           | -6.525124               | -2.928382 | -0.394878 |
| 18            | 6             | 0           | -5.285703               | -3.477048 | -0.622294 |
| 19            | 6             | 0           | -4.390931               | 1.384212  | -2.193636 |
| 20            | 6             | 0           | -5.068989               | 2.221651  | -3.052545 |
| 21            | 6             | 0           | -5.235230               | 3.591691  | -2.745068 |
| 22            | 6             | 0           | -4.693155               | 4.096086  | -1.584742 |
| 23            | 1             | 0           | -2.749135               | -4.305072 | -0.985401 |
| 24            | 1             | 0           | -5.181644               | -4.536772 | -0.844784 |
| 25            | 1             | 0           | -7.417078               | -3.546983 | -0.440166 |
| 26            | 1             | 0           | -7.609755               | -1.122400 | 0.121253  |
| 27            | 1             | 0           | -5.617336               | 0.300361  | 0.214882  |
| 28            | 1             | 0           | -4.265870               | 0.339102  | -2.453908 |
| 29            | 1             | 0           | -5.476259               | 1.824576  | -3.978926 |
| 30            | 1             | 0           | -5.777333               | 4.240910  | -3.427270 |
| 31            | 1             | 0           | -4.796374               | 5.151313  | -1.340771 |
| 32            | 1             | 0           | -3.501787               | 4.848015  | 0.713878  |
| 33            | 1             | 0           | -2.141995               | 3.384347  | 2.202251  |
| 34            | 7             | 0           | -0.415513               | -3.092966 | -0.715387 |
| 35            | 8             | 0           | -0.625655               | -0.393122 | -0.236410 |
| 36            | 8             | 0           | -1.687777               | 0.875476  | 1.852025  |
| 37            | 22            | 0           | 0.076053                | 0.476436  | 1.342589  |

|    |   |   |           |           |           |
|----|---|---|-----------|-----------|-----------|
| 38 | 8 | 0 | 0.728268  | 2.134195  | 1.276001  |
| 39 | 8 | 0 | 0.527982  | -0.532576 | 2.741324  |
| 40 | 6 | 0 | -0.072437 | -4.352834 | -0.234874 |
| 41 | 6 | 0 | 1.252104  | -4.533788 | -0.505366 |
| 42 | 7 | 0 | 1.704066  | -3.399407 | -1.144508 |
| 43 | 6 | 0 | 0.691140  | -2.547174 | -1.254981 |
| 44 | 1 | 0 | -0.791355 | -4.976976 | 0.269613  |
| 45 | 1 | 0 | 1.901037  | -5.367942 | -0.289515 |
| 46 | 1 | 0 | 0.746908  | -1.554426 | -1.664437 |
| 47 | 6 | 0 | 1.529564  | -0.839636 | 3.698370  |
| 48 | 6 | 0 | 1.574120  | 0.252021  | 4.768192  |
| 49 | 6 | 0 | 1.240442  | -2.224005 | 4.279357  |
| 50 | 1 | 0 | 2.493633  | -0.866172 | 3.168914  |
| 51 | 6 | 0 | 1.685903  | 3.065327  | 0.795321  |
| 52 | 6 | 0 | 1.118620  | 3.784370  | -0.428993 |
| 53 | 6 | 0 | 2.052060  | 4.025306  | 1.927659  |
| 54 | 1 | 0 | 2.579628  | 2.498445  | 0.499302  |
| 55 | 1 | 0 | 0.617045  | 0.304945  | 5.299179  |
| 56 | 1 | 0 | 2.366933  | 0.047485  | 5.497307  |
| 57 | 1 | 0 | 1.767182  | 1.227684  | 4.310211  |
| 58 | 1 | 0 | 2.018796  | -2.513012 | 4.995427  |
| 59 | 1 | 0 | 0.273803  | -2.226461 | 4.795198  |
| 60 | 1 | 0 | 1.207210  | -2.973543 | 3.481737  |
| 61 | 1 | 0 | 1.847006  | 4.500399  | -0.827645 |
| 62 | 1 | 0 | 0.876267  | 3.063750  | -1.216857 |
| 63 | 1 | 0 | 0.202627  | 4.324256  | -0.165343 |
| 64 | 1 | 0 | 1.172056  | 4.593715  | 2.249172  |
| 65 | 1 | 0 | 2.439401  | 3.472627  | 2.790115  |
| 66 | 1 | 0 | 2.821586  | 4.732851  | 1.597435  |
| 67 | 1 | 0 | 2.737105  | -3.068343 | -1.395094 |
| 68 | 6 | 0 | 7.692136  | 1.062125  | -1.694726 |
| 69 | 6 | 0 | 7.459163  | 0.648963  | -0.374795 |
| 70 | 6 | 0 | 6.415609  | -0.221602 | -0.071241 |
| 71 | 6 | 0 | 5.572910  | -0.697322 | -1.080500 |
| 72 | 6 | 0 | 5.796585  | -0.294028 | -2.399283 |
| 73 | 6 | 0 | 6.842074  | 0.577304  | -2.698201 |
| 74 | 6 | 0 | 4.471543  | -1.668730 | -0.767518 |
| 75 | 8 | 0 | 3.910852  | -2.293536 | -1.726736 |
| 76 | 1 | 0 | 4.619866  | -2.187871 | 0.194780  |
| 77 | 6 | 0 | 8.845150  | 1.979740  | -2.028089 |
| 78 | 1 | 0 | 8.104509  | 1.013440  | 0.421572  |
| 79 | 1 | 0 | 6.246409  | -0.526997 | 0.959799  |
| 80 | 1 | 0 | 5.146718  | -0.678446 | -3.178838 |
| 81 | 1 | 0 | 7.004269  | 0.886132  | -3.728762 |
| 82 | 1 | 0 | 8.640901  | 2.569010  | -2.928275 |
| 83 | 1 | 0 | 9.055646  | 2.675118  | -1.208254 |
| 84 | 1 | 0 | 9.765880  | 1.410284  | -2.214247 |

E<sub>ZPE</sub>: B3LYP/6-31G\* = -2859.67896 (a.u.)

Gsol: B3LYP/6-311++G\*\*/(SMD,M06-2X/6-31G\*,CH2Cl2) = -2860.3974 (a.u.)

#### TS16<sub>4-CH3C6H4</sub>

Standard orientation:

| Center Number | Atomic Number | Atomic Type | Coordinates (Angstroms) |           |           |
|---------------|---------------|-------------|-------------------------|-----------|-----------|
|               |               |             | X                       | Y         | Z         |
| 1             | 6             | 0           | -2.703554               | -3.423258 | -0.120156 |
| 2             | 6             | 0           | -3.967735               | -2.927877 | 0.272203  |
| 3             | 6             | 0           | -4.149946               | -1.509177 | 0.392104  |
| 4             | 6             | 0           | -3.073054               | -0.610522 | 0.077994  |
| 5             | 6             | 0           | -1.807925               | -1.132966 | -0.215578 |
| 6             | 6             | 0           | -1.663265               | -2.555293 | -0.341915 |
| 7             | 6             | 0           | -3.275093               | 0.867220  | 0.099722  |
| 8             | 6             | 0           | -4.242126               | 1.514983  | -0.744833 |
| 9             | 6             | 0           | -4.475231               | 2.924509  | -0.602849 |
| 10            | 6             | 0           | -3.720334               | 3.656602  | 0.353142  |
| 11            | 6             | 0           | -2.748812               | 3.043378  | 1.100147  |
| 12            | 6             | 0           | -2.499643               | 1.650117  | 0.956610  |
| 13            | 6             | 0           | -5.414798               | -1.050573 | 0.862044  |



|    |    |   |           |           |           |
|----|----|---|-----------|-----------|-----------|
| 14 | 6  | 0 | -6.430984 | -1.930788 | 1.158011  |
| 15 | 6  | 0 | -6.252728 | -3.326428 | 1.001746  |
| 16 | 6  | 0 | -5.040291 | -3.810493 | 0.572058  |
| 17 | 6  | 0 | -4.971283 | 0.825733  | -1.755411 |
| 18 | 6  | 0 | -5.888698 | 1.478199  | -2.550039 |
| 19 | 6  | 0 | -6.137246 | 2.859962  | -2.382144 |
| 20 | 6  | 0 | -5.437282 | 3.563124  | -1.428104 |
| 21 | 1  | 0 | -2.549081 | -4.495405 | -0.210346 |
| 22 | 1  | 0 | -4.877194 | -4.880716 | 0.465799  |
| 23 | 1  | 0 | -7.066145 | -4.008099 | 1.233991  |
| 24 | 1  | 0 | -7.380817 | -1.548767 | 1.522469  |
| 25 | 1  | 0 | -5.567627 | 0.012937  | 0.999477  |
| 26 | 1  | 0 | -4.787823 | -0.231971 | -1.907997 |
| 27 | 1  | 0 | -6.423647 | 0.924569  | -3.317548 |
| 28 | 1  | 0 | -6.867651 | 3.361984  | -3.010814 |
| 29 | 1  | 0 | -5.603328 | 4.630246  | -1.296641 |
| 30 | 1  | 0 | -3.912049 | 4.721101  | 0.468893  |
| 31 | 1  | 0 | -2.141539 | 3.594255  | 1.811198  |
| 32 | 7  | 0 | -0.399972 | -3.080229 | -0.777005 |
| 33 | 8  | 0 | -0.726186 | -0.375900 | -0.425845 |
| 34 | 8  | 0 | -1.496133 | 1.102407  | 1.674187  |
| 35 | 22 | 0 | 0.153897  | 0.779950  | 0.835670  |
| 36 | 8  | 0 | 0.616200  | 2.470988  | 0.490970  |
| 37 | 8  | 0 | 0.968402  | -0.086768 | 2.177248  |
| 38 | 6  | 0 | -0.210225 | -3.952557 | -1.842662 |
| 39 | 6  | 0 | 1.135775  | -4.126122 | -1.976371 |
| 40 | 7  | 0 | 1.751072  | -3.371278 | -1.000257 |
| 41 | 6  | 0 | 0.811098  | -2.748486 | -0.295954 |
| 42 | 1  | 0 | -1.045216 | -4.335811 | -2.406227 |
| 43 | 1  | 0 | 1.698524  | -4.715366 | -2.683236 |
| 44 | 1  | 0 | 0.988641  | -2.074799 | 0.525741  |
| 45 | 6  | 0 | 2.165306  | -0.105888 | 2.950140  |
| 46 | 6  | 0 | 2.328199  | 1.218539  | 3.696344  |
| 47 | 6  | 0 | 2.115653  | -1.307710 | 3.893216  |
| 48 | 1  | 0 | 3.002459  | -0.229880 | 2.247791  |
| 49 | 6  | 0 | 1.294333  | 3.383605  | -0.361062 |
| 50 | 6  | 0 | 0.480350  | 3.591776  | -1.638606 |
| 51 | 6  | 0 | 1.530761  | 4.684337  | 0.406781  |
| 52 | 1  | 0 | 2.263225  | 2.934510  | -0.620574 |
| 53 | 1  | 0 | 1.496438  | 1.368772  | 4.394076  |
| 54 | 1  | 0 | 3.265513  | 1.227016  | 4.264601  |
| 55 | 1  | 0 | 2.343193  | 2.056491  | 2.991885  |
| 56 | 1  | 0 | 3.041563  | -1.376647 | 4.475782  |
| 57 | 1  | 0 | 1.272762  | -1.214320 | 4.587031  |
| 58 | 1  | 0 | 1.996218  | -2.239181 | 3.329715  |
| 59 | 1  | 0 | 0.992075  | 4.288022  | -2.313662 |
| 60 | 1  | 0 | 0.343618  | 2.640558  | -2.163548 |
| 61 | 1  | 0 | -0.508324 | 3.998678  | -1.399084 |
| 62 | 1  | 0 | 0.575789  | 5.145020  | 0.683444  |
| 63 | 1  | 0 | 2.099633  | 4.493528  | 1.322699  |
| 64 | 1  | 0 | 2.094618  | 5.395401  | -0.208354 |
| 65 | 1  | 0 | 2.827685  | -3.111505 | -0.887476 |
| 66 | 7  | 0 | 1.964456  | 0.243202  | -0.375534 |
| 67 | 6  | 0 | 2.964381  | -0.136647 | -0.848782 |
| 68 | 6  | 0 | 7.292391  | 0.932163  | -1.731273 |
| 69 | 6  | 0 | 6.099101  | 0.255127  | -1.967169 |
| 70 | 6  | 0 | 5.641870  | -0.710686 | -1.064841 |
| 71 | 6  | 0 | 6.402669  | -0.992989 | 0.072350  |
| 72 | 6  | 0 | 7.596317  | -0.311973 | 0.304401  |
| 73 | 6  | 0 | 8.063209  | 0.659412  | -0.591209 |
| 74 | 6  | 0 | 4.375228  | -1.470767 | -1.329853 |
| 75 | 8  | 0 | 4.122115  | -2.510460 | -0.638054 |
| 76 | 1  | 0 | 4.067874  | -1.442630 | -2.388285 |
| 77 | 1  | 0 | 7.633088  | 1.683844  | -2.440110 |
| 78 | 1  | 0 | 5.509245  | 0.486409  | -2.852158 |
| 79 | 1  | 0 | 6.049065  | -1.754020 | 0.760649  |
| 80 | 1  | 0 | 8.178436  | -0.538911 | 1.195121  |
| 81 | 6  | 0 | 9.372734  | 1.374289  | -0.352988 |
| 82 | 1  | 0 | 9.638356  | 1.380018  | 0.709261  |
| 83 | 1  | 0 | 10.196270 | 0.887112  | -0.892449 |

84 1 0 9.331609 2.413418 -0.697615

E<sub>ZPE</sub>: B3LYP/6-31G\* = -2859.67871 (a.u.)

Gsol: B3LYP/6-311++G\*\*/(SMD,M06-2X/6-31G\*,CH2Cl2) = -2860.36733 (a.u.)

TS14<sub>IPr</sub>

Standard orientation:

| Center<br>Number | Atomic<br>Number | Atomic<br>Type | Coordinates (Angstroms) |           |           |
|------------------|------------------|----------------|-------------------------|-----------|-----------|
|                  |                  |                | X                       | Y         | Z         |
| 1                | 7                | 0              | -2.574143               | -0.477677 | -0.146551 |
| 2                | 6                | 0              | -3.624242               | -0.263644 | -0.618620 |
| 3                | 6                | 0              | 1.780267                | 3.521431  | -0.118238 |
| 4                | 6                | 0              | 3.107522                | 3.127924  | 0.165309  |
| 5                | 6                | 0              | 3.413995                | 1.728545  | 0.254959  |
| 6                | 6                | 0              | 2.393705                | 0.749114  | 0.005005  |
| 7                | 6                | 0              | 1.072981                | 1.168498  | -0.189766 |
| 8                | 6                | 0              | 0.795082                | 2.574266  | -0.258124 |
| 9                | 6                | 0              | 2.704677                | -0.709731 | 0.005755  |
| 10               | 6                | 0              | 3.660235                | -1.285559 | -0.901158 |
| 11               | 6                | 0              | 4.000371                | -2.675447 | -0.783101 |
| 12               | 6                | 0              | 3.358348                | -3.460761 | 0.212311  |
| 13               | 6                | 0              | 2.393404                | -2.919147 | 1.020627  |
| 14               | 6                | 0              | 2.038822                | -1.546343 | 0.903362  |
| 15               | 6                | 0              | 4.744456                | 1.372426  | 0.621104  |
| 16               | 6                | 0              | 5.706507                | 2.331343  | 0.844030  |
| 17               | 6                | 0              | 5.405288                | 3.708186  | 0.709931  |
| 18               | 6                | 0              | 4.127874                | 4.093647  | 0.380615  |
| 19               | 6                | 0              | 4.273265                | -0.544479 | -1.951362 |
| 20               | 6                | 0              | 5.181582                | -1.128872 | -2.807089 |
| 21               | 6                | 0              | 5.537097                | -2.489889 | -2.663929 |
| 22               | 6                | 0              | 4.950814                | -3.242527 | -1.671692 |
| 23               | 1                | 0              | 1.547589                | 4.578266  | -0.218148 |
| 24               | 1                | 0              | 3.872695                | 5.147495  | 0.292889  |
| 25               | 1                | 0              | 6.177678                | 4.452942  | 0.880390  |
| 26               | 1                | 0              | 6.709532                | 2.027127  | 1.130952  |
| 27               | 1                | 0              | 4.992255                | 0.324282  | 0.736256  |
| 28               | 1                | 0              | 4.005982                | 0.497858  | -2.085043 |
| 29               | 1                | 0              | 5.625784                | -0.537324 | -3.603632 |
| 30               | 1                | 0              | 6.259306                | -2.938055 | -3.340927 |
| 31               | 1                | 0              | 5.199522                | -4.295607 | -1.558294 |
| 32               | 1                | 0              | 3.630601                | -4.509561 | 0.308825  |
| 33               | 1                | 0              | 1.869196                | -3.513233 | 1.762256  |
| 34               | 7                | 0              | -0.561612               | 3.001014  | -0.449588 |
| 35               | 8                | 0              | 0.051374                | 0.322073  | -0.351243 |
| 36               | 8                | 0              | 1.045732                | -1.074726 | 1.685175  |
| 37               | 22               | 0              | -0.685597               | -0.882881 | 0.975546  |
| 38               | 8                | 0              | -1.015151               | -2.599472 | 0.617738  |
| 39               | 8                | 0              | -1.479510               | -0.170428 | 2.403450  |
| 40               | 6                | 0              | -1.161017               | 4.102772  | 0.152629  |
| 41               | 6                | 0              | -2.458282               | 4.129392  | -0.266733 |
| 42               | 7                | 0              | -2.638661               | 3.057772  | -1.114286 |
| 43               | 6                | 0              | -1.492896               | 2.390267  | -1.205735 |
| 44               | 1                | 0              | -0.617404               | 4.735265  | 0.834599  |
| 45               | 1                | 0              | -3.257249               | 4.812820  | -0.026250 |
| 46               | 1                | 0              | -1.338310               | 1.477931  | -1.753554 |
| 47               | 6                | 0              | -2.647389               | -0.151184 | 3.209748  |
| 48               | 6                | 0              | -2.650738               | -1.362882 | 4.142427  |
| 49               | 6                | 0              | -2.694580               | 1.176258  | 3.966955  |
| 50               | 1                | 0              | -3.514148               | -0.211763 | 2.535148  |
| 51               | 6                | 0              | -1.749754               | -3.600896 | -0.066628 |
| 52               | 6                | 0              | -0.997063               | -4.001795 | -1.335894 |
| 53               | 6                | 0              | -1.977164               | -4.779276 | 0.881379  |
| 54               | 1                | 0              | -2.721170               | -3.168191 | -0.345051 |
| 55               | 1                | 0              | -1.784077               | -1.331242 | 4.812202  |
| 56               | 1                | 0              | -3.562266               | -1.379901 | 4.751353  |
| 57               | 1                | 0              | -2.603530               | -2.290735 | 3.562907  |
| 58               | 1                | 0              | -3.607865               | 1.245253  | 4.569641  |
| 59               | 1                | 0              | -1.829524               | 1.266146  | 4.633436  |

|    |   |   |           |           |           |
|----|---|---|-----------|-----------|-----------|
| 60 | 1 | 0 | -2.677688 | 2.016653  | 3.264990  |
| 61 | 1 | 0 | -1.549885 | -4.772943 | -1.885465 |
| 62 | 1 | 0 | -0.867154 | -3.135742 | -1.992979 |
| 63 | 1 | 0 | -0.005316 | -4.393126 | -1.083872 |
| 64 | 1 | 0 | -1.019926 | -5.220088 | 1.181518  |
| 65 | 1 | 0 | -2.502594 | -4.450671 | 1.784312  |
| 66 | 1 | 0 | -2.579620 | -5.554885 | 0.394099  |
| 67 | 1 | 0 | -3.551638 | 2.646583  | -1.555574 |
| 68 | 6 | 0 | -6.010997 | -0.170515 | -2.125969 |
| 69 | 6 | 0 | -5.123889 | 0.888180  | -1.472688 |
| 70 | 8 | 0 | -4.548311 | 1.741220  | -2.205434 |
| 71 | 1 | 0 | -5.452698 | 1.184112  | -0.458731 |
| 72 | 6 | 0 | -6.559951 | -1.194437 | -1.129947 |
| 73 | 6 | 0 | -7.152232 | 0.575220  | -2.846942 |
| 74 | 1 | 0 | -5.401409 | -0.676317 | -2.883866 |
| 75 | 1 | 0 | -7.211257 | -1.914076 | -1.638296 |
| 76 | 1 | 0 | -5.753998 | -1.749164 | -0.640347 |
| 77 | 1 | 0 | -7.158256 | -0.704806 | -0.350162 |
| 78 | 1 | 0 | -7.799292 | -0.135716 | -3.373136 |
| 79 | 1 | 0 | -7.777707 | 1.126930  | -2.132563 |
| 80 | 1 | 0 | -6.751739 | 1.289261  | -3.571601 |

-----  
 E<sub>ZPE</sub>: B3LYP/6-31G\* = -2707.27518 (a.u.)  
 Gsol: B3LYP/6-311++G\*\*/(SMD,M06-2X/6-31G\*,CH2Cl2) = -2707.95415 (a.u.)

**TS16**<sub>Pr</sub>

Standard orientation:

| Center<br>Number | Atomic<br>Number | Atomic<br>Type | Coordinates (Angstroms) |           |           |
|------------------|------------------|----------------|-------------------------|-----------|-----------|
|                  |                  |                | X                       | Y         | Z         |
| 1                | 6                | 0              | 1.671550                | 3.553556  | 0.038209  |
| 2                | 6                | 0              | 2.987036                | 3.189220  | 0.403449  |
| 3                | 6                | 0              | 3.331370                | 1.796843  | 0.455705  |
| 4                | 6                | 0              | 2.361866                | 0.795932  | 0.103697  |
| 5                | 6                | 0              | 1.041684                | 1.181548  | -0.159312 |
| 6                | 6                | 0              | 0.735818                | 2.582524  | -0.220493 |
| 7                | 6                | 0              | 2.733436                | -0.647681 | 0.057427  |
| 8                | 6                | 0              | 3.760496                | -1.141177 | -0.819738 |
| 9                | 6                | 0              | 4.156643                | -2.518907 | -0.741206 |
| 10               | 6                | 0              | 3.501087                | -3.374123 | 0.185438  |
| 11               | 6                | 0              | 2.472419                | -2.910914 | 0.963555  |
| 12               | 6                | 0              | 2.062727                | -1.550899 | 0.883269  |
| 13               | 6                | 0              | 4.644038                | 1.464858  | 0.900548  |
| 14               | 6                | 0              | 5.554741                | 2.441076  | 1.236011  |
| 15               | 6                | 0              | 5.216688                | 3.812890  | 1.146079  |
| 16               | 6                | 0              | 3.953762                | 4.174290  | 0.742138  |
| 17               | 6                | 0              | 4.394533                | -0.328756 | -1.802403 |
| 18               | 6                | 0              | 5.372127                | -0.835421 | -2.630924 |
| 19               | 6                | 0              | 5.780338                | -2.185062 | -2.525992 |
| 20               | 6                | 0              | 5.177199                | -3.005108 | -1.599526 |
| 21               | 1                | 0              | 1.395163                | 4.604088  | -0.000863 |
| 22               | 1                | 0              | 3.668549                | 5.222562  | 0.686696  |
| 23               | 1                | 0              | 5.948538                | 4.571709  | 1.408481  |
| 24               | 1                | 0              | 6.544699                | 2.154084  | 1.580347  |
| 25               | 1                | 0              | 4.918108                | 0.420576  | 0.987727  |
| 26               | 1                | 0              | 4.088779                | 0.706395  | -1.905854 |
| 27               | 1                | 0              | 5.831060                | -0.190756 | -3.376258 |
| 28               | 1                | 0              | 6.556646                | -2.571665 | -3.180680 |
| 29               | 1                | 0              | 5.467120                | -4.050458 | -1.516569 |
| 30               | 1                | 0              | 3.815788                | -4.413242 | 0.252806  |
| 31               | 1                | 0              | 1.939672                | -3.558834 | 1.652117  |
| 32               | 7                | 0              | -0.581613               | 2.980553  | -0.629581 |
| 33               | 8                | 0              | 0.050607                | 0.317511  | -0.398235 |
| 34               | 8                | 0              | 1.011340                | -1.152564 | 1.628998  |
| 35               | 22               | 0              | -0.677884               | -0.989880 | 0.818688  |
| 36               | 8                | 0              | -0.938452               | -2.713812 | 0.422362  |
| 37               | 8                | 0              | -1.562530               | -0.272040 | 2.203003  |
| 38               | 6                | 0              | -0.871432               | 3.897073  | -1.634060 |
| 39               | 6                | 0              | -2.228186               | 3.926894  | -1.764192 |

|    |   |   |           |           |           |
|----|---|---|-----------|-----------|-----------|
| 40 | 7 | 0 | -2.749758 | 3.040928  | -0.845371 |
| 41 | 6 | 0 | -1.744607 | 2.479736  | -0.178912 |
| 42 | 1 | 0 | -0.086458 | 4.409452  | -2.165806 |
| 43 | 1 | 0 | -2.856128 | 4.494693  | -2.432460 |
| 44 | 1 | 0 | -1.844692 | 1.736240  | 0.593995  |
| 45 | 6 | 0 | -2.731287 | -0.425254 | 3.002277  |
| 46 | 6 | 0 | -2.680417 | -1.758260 | 3.749427  |
| 47 | 6 | 0 | -2.834572 | 0.772231  | 3.946668  |
| 48 | 1 | 0 | -3.593990 | -0.424795 | 2.320056  |
| 49 | 6 | 0 | -1.530494 | -3.672017 | -0.442439 |
| 50 | 6 | 0 | -0.696485 | -3.790669 | -1.718505 |
| 51 | 6 | 0 | -1.653435 | -4.998176 | 0.308583  |
| 52 | 1 | 0 | -2.534537 | -3.307233 | -0.700889 |
| 53 | 1 | 0 | -1.822299 | -1.781328 | 4.430674  |
| 54 | 1 | 0 | -3.594834 | -1.906685 | 4.335541  |
| 55 | 1 | 0 | -2.582107 | -2.589524 | 3.043641  |
| 56 | 1 | 0 | -3.744982 | 0.706006  | 4.553501  |
| 57 | 1 | 0 | -1.968973 | 0.803962  | 4.617608  |
| 58 | 1 | 0 | -2.868143 | 1.710150  | 3.382211  |
| 59 | 1 | 0 | -1.139569 | -4.522871 | -2.403938 |
| 60 | 1 | 0 | -0.645570 | -2.824593 | -2.231441 |
| 61 | 1 | 0 | 0.324586  | -4.107260 | -1.478625 |
| 62 | 1 | 0 | -0.662533 | -5.377303 | 0.582686  |
| 63 | 1 | 0 | -2.238508 | -4.869096 | 1.225170  |
| 64 | 1 | 0 | -2.151840 | -5.748358 | -0.316551 |
| 65 | 1 | 0 | -3.778400 | 2.673494  | -0.752134 |
| 66 | 6 | 0 | -7.616649 | 0.859518  | -1.486283 |
| 67 | 6 | 0 | -6.374041 | -0.009342 | -1.202251 |
| 68 | 6 | 0 | -5.152641 | 0.897821  | -1.329811 |
| 69 | 8 | 0 | -5.035147 | 1.889001  | -0.557213 |
| 70 | 1 | 0 | -4.742830 | 0.962177  | -2.354601 |
| 71 | 1 | 0 | -8.530527 | 0.266572  | -1.367497 |
| 72 | 6 | 0 | -6.317709 | -1.222296 | -2.133261 |
| 73 | 1 | 0 | -7.658837 | 1.711606  | -0.802328 |
| 74 | 1 | 0 | -7.603636 | 1.245648  | -2.514156 |
| 75 | 1 | 0 | -6.421556 | -0.340625 | -0.158309 |
| 76 | 1 | 0 | -5.452269 | -1.853670 | -1.912315 |
| 77 | 1 | 0 | -7.223760 | -1.829460 | -2.029183 |
| 78 | 1 | 0 | -6.250652 | -0.909326 | -3.183528 |
| 79 | 7 | 0 | -2.540847 | -0.636857 | -0.353847 |
| 80 | 6 | 0 | -3.592377 | -0.398965 | -0.811529 |

$E_{ZPE}$ : B3LYP/6-31G\* = -2707.27499 (a.u.)  
 $G_{sol}$ : B3LYP/6-311++G\*\*/(SMD,M06-2X/6-31G\*,CH2Cl2) = -2707.92187 (a.u.)

#### Transition states under the catalyzes of 3 and 4

$Ts_{17}$

Standard orientation:

| Center Number | Atomic Number | Atomic Type | Coordinates (Angstroms) |           |           |
|---------------|---------------|-------------|-------------------------|-----------|-----------|
|               |               |             | X                       | Y         | Z         |
| 1             | 6             | 0           | -3.293713               | 3.309025  | -0.059058 |
| 2             | 6             | 0           | -4.015971               | 2.515168  | -0.979425 |
| 3             | 6             | 0           | -3.601218               | 1.160781  | -1.199748 |
| 4             | 6             | 0           | -2.606484               | 0.570690  | -0.340203 |
| 5             | 6             | 0           | -1.935574               | 1.372196  | 0.592305  |
| 6             | 6             | 0           | -2.223054               | 2.788157  | 0.624981  |
| 7             | 6             | 0           | -4.203477               | 0.467902  | -2.289137 |
| 8             | 6             | 0           | -5.194094               | 1.048267  | -3.050356 |
| 9             | 6             | 0           | -5.650609               | 2.358154  | -2.772757 |
| 10            | 6             | 0           | -5.061239               | 3.077741  | -1.760382 |
| 11            | 1             | 0           | -3.549323               | 4.360433  | 0.033173  |
| 12            | 1             | 0           | -5.368321               | 4.101275  | -1.556682 |
| 13            | 1             | 0           | -6.442950               | 2.797837  | -3.371999 |
| 14            | 1             | 0           | -5.626669               | 0.492471  | -3.877903 |
| 15            | 1             | 0           | -3.867232               | -0.533360 | -2.526291 |

|    |    |   |           |           |           |
|----|----|---|-----------|-----------|-----------|
| 16 | 7  | 0 | -1.259077 | 3.699583  | 1.184554  |
| 17 | 8  | 0 | -1.072120 | 0.885444  | 1.474007  |
| 18 | 22 | 0 | 0.429838  | -0.335728 | 1.620355  |
| 19 | 8  | 0 | 1.050825  | 0.541545  | 3.098296  |
| 20 | 8  | 0 | -0.248086 | -1.780953 | 2.358609  |
| 21 | 6  | 0 | -0.993228 | 4.963793  | 0.634318  |
| 22 | 6  | 0 | 0.251328  | 5.321211  | 1.042726  |
| 23 | 7  | 0 | 0.756387  | 4.317672  | 1.854679  |
| 24 | 6  | 0 | -0.188993 | 3.376222  | 1.937749  |
| 25 | 1  | 0 | -1.687480 | 5.454437  | -0.025469 |
| 26 | 1  | 0 | 0.826358  | 6.202243  | 0.801346  |
| 27 | 1  | 0 | -0.051396 | 2.427223  | 2.423550  |
| 28 | 6  | 0 | -1.305440 | -2.681999 | 2.690809  |
| 29 | 6  | 0 | -0.722371 | -3.858144 | 3.471790  |
| 30 | 6  | 0 | -2.399954 | -1.941858 | 3.456511  |
| 31 | 1  | 0 | -1.712864 | -3.045854 | 1.741454  |
| 32 | 6  | 0 | 0.868817  | 0.360305  | 4.503305  |
| 33 | 6  | 0 | 2.156758  | 0.727268  | 5.241046  |
| 34 | 6  | 0 | -0.319044 | 1.191953  | 4.995547  |
| 35 | 1  | 0 | 0.645979  | -0.702850 | 4.678028  |
| 36 | 1  | 0 | -0.292292 | -3.518443 | 4.421013  |
| 37 | 1  | 0 | -1.508083 | -4.590360 | 3.690443  |
| 38 | 1  | 0 | 0.062535  | -4.356219 | 2.894864  |
| 39 | 1  | 0 | -3.248516 | -2.610797 | 3.638489  |
| 40 | 1  | 0 | -2.025237 | -1.586026 | 4.423249  |
| 41 | 1  | 0 | -2.754513 | -1.083427 | 2.879576  |
| 42 | 1  | 0 | 2.023997  | 0.603120  | 6.322484  |
| 43 | 1  | 0 | 2.987960  | 0.091798  | 4.923386  |
| 44 | 1  | 0 | 2.426304  | 1.770900  | 5.043335  |
| 45 | 1  | 0 | -0.111176 | 2.263729  | 4.892331  |
| 46 | 1  | 0 | -1.223088 | 0.955962  | 4.426391  |
| 47 | 1  | 0 | -0.512686 | 0.988015  | 6.055401  |
| 48 | 22 | 0 | 2.253682  | -0.243565 | -1.159003 |
| 49 | 8  | 0 | 1.632891  | 0.678899  | -2.576792 |
| 50 | 8  | 0 | 2.158972  | -0.888138 | 0.864972  |
| 51 | 8  | 0 | 2.369526  | -1.962257 | -1.752460 |
| 52 | 8  | 0 | 4.027929  | 0.100245  | -1.340729 |
| 53 | 6  | 0 | 0.557011  | 1.497322  | -3.001293 |
| 54 | 6  | 0 | 1.096673  | 2.872300  | -3.401439 |
| 55 | 6  | 0 | -0.186122 | 0.805145  | -4.145640 |
| 56 | 6  | 0 | 4.776178  | 1.140787  | -1.959507 |
| 57 | 6  | 0 | 5.818670  | 1.677972  | -0.978000 |
| 58 | 6  | 0 | 5.415076  | 0.609970  | -3.245100 |
| 59 | 6  | 0 | 3.334232  | -1.504429 | 1.442439  |
| 60 | 6  | 0 | 2.940199  | -2.602030 | 2.428253  |
| 61 | 6  | 0 | 4.255329  | -0.453630 | 2.055395  |
| 62 | 6  | 0 | 3.196152  | -2.658839 | -2.669003 |
| 63 | 6  | 0 | 3.464698  | -4.068047 | -2.135662 |
| 64 | 6  | 0 | 2.544183  | -2.676273 | -4.053689 |
| 65 | 1  | 0 | -0.132748 | 1.615677  | -2.155017 |
| 66 | 1  | 0 | 1.625166  | 3.331044  | -2.560154 |
| 67 | 1  | 0 | 1.794417  | 2.780836  | -4.242288 |
| 68 | 1  | 0 | 0.276943  | 3.535484  | -3.704196 |
| 69 | 1  | 0 | -1.048347 | 1.403464  | -4.463702 |
| 70 | 1  | 0 | 0.478094  | 0.667117  | -5.007178 |
| 71 | 1  | 0 | -0.547305 | -0.177510 | -3.826728 |
| 72 | 1  | 0 | 4.083145  | 1.951818  | -2.221935 |
| 73 | 1  | 0 | 6.398415  | 2.486329  | -1.440158 |
| 74 | 1  | 0 | 5.333842  | 2.071823  | -0.080293 |
| 75 | 1  | 0 | 6.512364  | 0.882228  | -0.681815 |
| 76 | 1  | 0 | 4.646537  | 0.230048  | -3.925583 |
| 77 | 1  | 0 | 6.114399  | -0.203822 | -3.019325 |
| 78 | 1  | 0 | 5.967588  | 1.406714  | -3.758142 |
| 79 | 1  | 0 | 3.851676  | -1.978159 | 0.599744  |
| 80 | 1  | 0 | 3.838771  | -3.128054 | 2.771895  |
| 81 | 1  | 0 | 2.430009  | -2.190065 | 3.305065  |
| 82 | 1  | 0 | 2.274337  | -3.328086 | 1.952860  |
| 83 | 1  | 0 | 5.147288  | -0.936817 | 2.473279  |
| 84 | 1  | 0 | 4.571685  | 0.260171  | 1.293532  |
| 85 | 1  | 0 | 3.744285  | 0.092651  | 2.851772  |

|     |   |   |           |           |           |
|-----|---|---|-----------|-----------|-----------|
| 86  | 1 | 0 | 4.152692  | -2.118084 | -2.730736 |
| 87  | 1 | 0 | 4.142305  | -4.613489 | -2.803678 |
| 88  | 1 | 0 | 3.923686  | -4.021770 | -1.142414 |
| 89  | 1 | 0 | 2.530504  | -4.636907 | -2.055756 |
| 90  | 1 | 0 | 1.595387  | -3.225262 | -4.024465 |
| 91  | 1 | 0 | 2.336867  | -1.655951 | -4.390386 |
| 92  | 1 | 0 | 3.200683  | -3.161164 | -4.786593 |
| 93  | 6 | 0 | -2.244897 | -0.867408 | -0.473359 |
| 94  | 6 | 0 | -3.259811 | -1.894516 | -0.442251 |
| 95  | 6 | 0 | -2.925750 | -3.243695 | -0.795141 |
| 96  | 6 | 0 | -1.574988 | -3.550382 | -1.110749 |
| 97  | 6 | 0 | -0.593856 | -2.599624 | -1.008408 |
| 98  | 6 | 0 | -0.906766 | -1.252170 | -0.657675 |
| 99  | 6 | 0 | -4.598461 | -1.640370 | -0.026836 |
| 100 | 6 | 0 | -5.547506 | -2.639975 | -0.002700 |
| 101 | 6 | 0 | -5.220782 | -3.956423 | -0.400459 |
| 102 | 6 | 0 | -3.930544 | -4.246070 | -0.783418 |
| 103 | 1 | 0 | -4.870520 | -0.640239 | 0.290820  |
| 104 | 1 | 0 | -6.557058 | -2.412308 | 0.329712  |
| 105 | 1 | 0 | -5.979782 | -4.733900 | -0.388169 |
| 106 | 1 | 0 | -3.653082 | -5.258353 | -1.069544 |
| 107 | 1 | 0 | -1.320376 | -4.568225 | -1.398968 |
| 108 | 1 | 0 | 0.446682  | -2.831195 | -1.202230 |
| 109 | 8 | 0 | 0.114193  | -0.372959 | -0.466609 |
| 110 | 1 | 0 | 1.790462  | 3.777243  | 1.559366  |
| 111 | 6 | 0 | 2.429514  | 2.706595  | 0.727398  |
| 112 | 7 | 0 | 2.244684  | 1.765063  | 0.057635  |

-----  
E<sub>ZPE</sub>: B3LYP/6-31G\* = -4099.215553 (a.u.)  
Gsol: B3LYP/6-311++G\*\*/(SMD,M06-2X/6-31G\*,CH2Cl2) = -4100.07706 (a.u.)

**Ts<sub>18</sub>**

Standard orientation:

| Center Number | Atomic Number | Atomic Type | Coordinates (Angstroms) |           |           |
|---------------|---------------|-------------|-------------------------|-----------|-----------|
|               |               |             | X                       | Y         | Z         |
| 1             | 6             | 0           | -3.377545               | 1.004572  | -3.136554 |
| 2             | 6             | 0           | -4.037171               | -0.171134 | -2.704243 |
| 3             | 6             | 0           | -3.610390               | -0.792800 | -1.482263 |
| 4             | 6             | 0           | -2.641428               | -0.144542 | -0.629343 |
| 5             | 6             | 0           | -2.026780               | 1.032494  | -1.071078 |
| 6             | 6             | 0           | -2.389397               | 1.550521  | -2.364345 |
| 7             | 6             | 0           | -4.160790               | -2.074597 | -1.187885 |
| 8             | 6             | 0           | -5.103651               | -2.659338 | -2.004460 |
| 9             | 6             | 0           | -5.562061               | -2.006388 | -3.172196 |
| 10            | 6             | 0           | -5.025734               | -0.788200 | -3.516095 |
| 11            | 1             | 0           | -3.598651               | 1.423754  | -4.114531 |
| 12            | 1             | 0           | -5.335277               | -0.283422 | -4.428517 |
| 13            | 1             | 0           | -6.314080               | -2.475430 | -3.800368 |
| 14            | 1             | 0           | -5.495550               | -3.640157 | -1.748696 |
| 15            | 1             | 0           | -3.821591               | -2.602448 | -0.306147 |
| 16            | 7             | 0           | -1.457384               | 2.482993  | -2.948306 |
| 17            | 8             | 0           | -1.122267               | 1.716255  | -0.379374 |
| 18            | 22            | 0           | 0.419349                | 1.470471  | 0.744554  |
| 19            | 8             | 0           | 1.007637                | 3.174963  | 0.509716  |
| 20            | 8             | 0           | -0.147181               | 1.555752  | 2.406300  |
| 21            | 6             | 0           | -1.257229               | 3.842927  | -2.760873 |
| 22            | 6             | 0           | 0.024615                | 4.106849  | -3.161352 |
| 23            | 7             | 0           | 0.603903                | 2.920915  | -3.581526 |
| 24            | 6             | 0           | -0.315597               | 1.979122  | -3.439291 |
| 25            | 1             | 0           | -2.029621               | 4.478241  | -2.358144 |
| 26            | 1             | 0           | 0.563711                | 5.041337  | -3.178296 |
| 27            | 1             | 0           | -0.144123               | 0.922987  | -3.574591 |
| 28            | 6             | 0           | -1.080591               | 1.517904  | 3.484318  |
| 29            | 6             | 0           | -0.357320               | 1.889602  | 4.777722  |
| 30            | 6             | 0           | -2.267527               | 2.430422  | 3.182316  |
| 31            | 1             | 0           | -1.431590               | 0.482380  | 3.554107  |
| 32            | 6             | 0           | 0.816135                | 4.408465  | 1.191467  |
| 33            | 6             | 0           | 2.046787                | 5.299417  | 1.011779  |

|     |    |   |           |           |           |
|-----|----|---|-----------|-----------|-----------|
| 34  | 6  | 0 | -0.455686 | 5.099976  | 0.693809  |
| 35  | 1  | 0 | 0.693785  | 4.184690  | 2.263033  |
| 36  | 1  | 0 | 0.010346  | 2.921371  | 4.735136  |
| 37  | 1  | 0 | -1.041051 | 1.801303  | 5.629855  |
| 38  | 1  | 0 | 0.494903  | 1.224977  | 4.948637  |
| 39  | 1  | 0 | -3.016479 | 2.347914  | 3.978010  |
| 40  | 1  | 0 | -1.945875 | 3.476200  | 3.116321  |
| 41  | 1  | 0 | -2.737970 | 2.145585  | 2.237265  |
| 42  | 1  | 0 | 1.907260  | 6.252832  | 1.535298  |
| 43  | 1  | 0 | 2.944488  | 4.818627  | 1.410412  |
| 44  | 1  | 0 | 2.213789  | 5.509907  | -0.050969 |
| 45  | 1  | 0 | -0.352122 | 5.369151  | -0.362638 |
| 46  | 1  | 0 | -1.321956 | 4.440134  | 0.795397  |
| 47  | 1  | 0 | -0.641754 | 6.016006  | 1.267704  |
| 48  | 22 | 0 | 2.228754  | -1.200801 | -0.263788 |
| 49  | 8  | 0 | 1.519602  | -2.367274 | -1.446480 |
| 50  | 8  | 0 | 2.206418  | 0.635352  | 0.782687  |
| 51  | 8  | 0 | 2.416301  | -2.181404 | 1.258424  |
| 52  | 8  | 0 | 3.995818  | -1.292037 | -0.667368 |
| 53  | 6  | 0 | 0.405447  | -2.565987 | -2.295853 |
| 54  | 6  | 0 | 0.880324  | -2.640683 | -3.749596 |
| 55  | 6  | 0 | -0.344061 | -3.828440 | -1.864263 |
| 56  | 6  | 0 | 4.864278  | -1.483042 | -1.773195 |
| 57  | 6  | 0 | 6.265403  | -1.000348 | -1.392740 |
| 58  | 6  | 0 | 4.856573  | -2.952220 | -2.201389 |
| 59  | 6  | 0 | 3.453043  | 1.074690  | 1.377870  |
| 60  | 6  | 0 | 3.216195  | 1.638944  | 2.777203  |
| 61  | 6  | 0 | 4.183638  | 2.042583  | 0.451411  |
| 62  | 6  | 0 | 3.346900  | -3.141260 | 1.726164  |
| 63  | 6  | 0 | 3.566263  | -2.943800 | 3.227995  |
| 64  | 6  | 0 | 2.856503  | -4.551809 | 1.390447  |
| 65  | 1  | 0 | -0.268750 | -1.704701 | -2.182609 |
| 66  | 1  | 0 | 1.442261  | -1.739506 | -4.014481 |
| 67  | 1  | 0 | 1.535261  | -3.507774 | -3.895580 |
| 68  | 1  | 0 | 0.026183  | -2.738321 | -4.431075 |
| 69  | 1  | 0 | -1.238174 | -3.977159 | -2.481518 |
| 70  | 1  | 0 | 0.300814  | -4.709326 | -1.966077 |
| 71  | 1  | 0 | -0.655490 | -3.747643 | -0.818468 |
| 72  | 1  | 0 | 4.490364  | -0.868561 | -2.604736 |
| 73  | 1  | 0 | 6.952880  | -1.103293 | -2.240975 |
| 74  | 1  | 0 | 6.244871  | 0.051632  | -1.091210 |
| 75  | 1  | 0 | 6.658051  | -1.590380 | -0.556102 |
| 76  | 1  | 0 | 3.835719  | -3.276343 | -2.419205 |
| 77  | 1  | 0 | 5.259915  | -3.586472 | -1.402627 |
| 78  | 1  | 0 | 5.472074  | -3.094492 | -3.098045 |
| 79  | 1  | 0 | 4.059560  | 0.168360  | 1.478725  |
| 80  | 1  | 0 | 4.178996  | 1.869390  | 3.249060  |
| 81  | 1  | 0 | 2.623320  | 2.557910  | 2.744682  |
| 82  | 1  | 0 | 2.690837  | 0.911155  | 3.403066  |
| 83  | 1  | 0 | 5.138904  | 2.341865  | 0.900621  |
| 84  | 1  | 0 | 4.384298  | 1.563261  | -0.508706 |
| 85  | 1  | 0 | 3.581463  | 2.935774  | 0.271566  |
| 86  | 1  | 0 | 4.298152  | -2.959679 | 1.201647  |
| 87  | 1  | 0 | 4.322283  | -3.643412 | 3.604651  |
| 88  | 1  | 0 | 3.905641  | -1.923647 | 3.436300  |
| 89  | 1  | 0 | 2.635132  | -3.115076 | 3.781428  |
| 90  | 1  | 0 | 1.914317  | -4.765589 | 1.909177  |
| 91  | 1  | 0 | 2.682355  | -4.647276 | 0.314457  |
| 92  | 1  | 0 | 3.595577  | -5.303173 | 1.694815  |
| 93  | 6  | 0 | -2.241331 | -0.760314 | 0.665224  |
| 94  | 6  | 0 | -3.235260 | -1.094253 | 1.657036  |
| 95  | 6  | 0 | -2.873816 | -1.882746 | 2.798423  |
| 96  | 6  | 0 | -1.516951 | -2.274961 | 2.948802  |
| 97  | 6  | 0 | -0.556466 | -1.843942 | 2.071633  |
| 98  | 6  | 0 | -0.894586 | -1.048393 | 0.935563  |
| 99  | 6  | 0 | -4.581890 | -0.635818 | 1.578946  |
| 100 | 6  | 0 | -5.511324 | -0.963674 | 2.542789  |
| 101 | 6  | 0 | -5.156100 | -1.779011 | 3.641589  |
| 102 | 6  | 0 | -3.858515 | -2.223020 | 3.762153  |
| 103 | 1  | 0 | -4.875165 | -0.002473 | 0.749127  |

|     |   |   |           |           |           |
|-----|---|---|-----------|-----------|-----------|
| 104 | 1 | 0 | -6.527651 | -0.587607 | 2.457311  |
| 105 | 1 | 0 | -5.899726 | -2.039777 | 4.389765  |
| 106 | 1 | 0 | -3.560024 | -2.833702 | 4.611649  |
| 107 | 1 | 0 | -1.239484 | -2.894309 | 3.799387  |
| 108 | 1 | 0 | 0.488472  | -2.095898 | 2.205536  |
| 109 | 8 | 0 | 0.110236  | -0.550100 | 0.165199  |
| 110 | 1 | 0 | 1.693354  | 2.394039  | -3.395603 |
| 111 | 6 | 0 | 2.386241  | 1.284913  | -2.748010 |
| 112 | 7 | 0 | 2.243073  | 0.399717  | -1.997557 |

-----  
 Ezpe: B3LYP/6-31G\* = -4099.221512 (a.u.)  
 Gsol: B3LYP/6-311++G\*\*/(SMD,M06-2X/6-31G\*,CH2Cl2) = -4100.08644 (a.u.)

**TS<sub>19</sub>**

Standard orientation:

| Center<br>Number | Atomic<br>Number | Atomic<br>Type | Coordinates (Angstroms) |           |           |
|------------------|------------------|----------------|-------------------------|-----------|-----------|
|                  |                  |                | X                       | Y         | Z         |
| 1                | 6                | 0              | -2.809707               | -1.012172 | -0.940899 |
| 2                | 7                | 0              | -1.954795               | -0.218880 | -0.830981 |
| 3                | 6                | 0              | 2.221169                | -3.612001 | -2.039538 |
| 4                | 6                | 0              | 3.185243                | -2.790053 | -2.667551 |
| 5                | 6                | 0              | 3.452292                | -1.492597 | -2.115970 |
| 6                | 6                | 0              | 2.835084                | -1.087604 | -0.878141 |
| 7                | 6                | 0              | 1.871498                | -1.913615 | -0.287432 |
| 8                | 6                | 0              | 1.571049                | -3.170518 | -0.916471 |
| 9                | 6                | 0              | 4.315916                | -0.637938 | -2.861475 |
| 10               | 6                | 0              | 4.906078                | -1.057043 | -4.033286 |
| 11               | 6                | 0              | 4.675068                | -2.357698 | -4.539866 |
| 12               | 6                | 0              | 3.822336                | -3.201497 | -3.868741 |
| 13               | 1                | 0              | 1.947117                | -4.561361 | -2.492401 |
| 14               | 1                | 0              | 3.606286                | -4.194607 | -4.256416 |
| 15               | 1                | 0              | 5.154290                | -2.676895 | -5.461080 |
| 16               | 1                | 0              | 5.554304                | -0.375843 | -4.577990 |
| 17               | 1                | 0              | 4.502050                | 0.365437  | -2.500228 |
| 18               | 7                | 0              | 0.467383                | -3.932158 | -0.406425 |
| 19               | 8                | 0              | 1.235315                | -1.625599 | 0.842028  |
| 20               | 22               | 0              | 0.290322                | -0.183613 | 1.708946  |
| 21               | 8                | 0              | -0.789272               | -1.321965 | 2.612363  |
| 22               | 8                | 0              | 1.384452                | 0.380103  | 2.967248  |
| 23               | 6                | 0              | 0.375621                | -5.293049 | -0.149075 |
| 24               | 6                | 0              | -0.927589               | -5.543173 | 0.183302  |
| 25               | 7                | 0              | -1.607344               | -4.343038 | 0.128517  |
| 26               | 6                | 0              | -0.747307               | -3.396916 | -0.221806 |
| 27               | 1                | 0              | 1.236538                | -5.939145 | -0.212475 |
| 28               | 1                | 0              | -1.411207               | -6.466707 | 0.460167  |
| 29               | 1                | 0              | -0.993865               | -2.360211 | -0.376391 |
| 30               | 6                | 0              | 2.653231                | 0.530426  | 3.601327  |
| 31               | 6                | 0              | 2.460929                | 1.296619  | 4.908748  |
| 32               | 6                | 0              | 3.303708                | -0.837113 | 3.801190  |
| 33               | 1                | 0              | 3.272376                | 1.127779  | 2.921659  |
| 34               | 6                | 0              | -0.733695               | -2.106910 | 3.797019  |
| 35               | 6                | 0              | -2.154992               | -2.378411 | 4.293358  |
| 36               | 6                | 0              | 0.037732                | -3.403599 | 3.539187  |
| 37               | 1                | 0              | -0.191739               | -1.524564 | 4.559348  |
| 38               | 1                | 0              | 1.837708                | 0.724256  | 5.605448  |
| 39               | 1                | 0              | 3.431194                | 1.481669  | 5.384072  |
| 40               | 1                | 0              | 1.977185                | 2.260518  | 4.723139  |
| 41               | 1                | 0              | 4.305924                | -0.719292 | 4.228856  |
| 42               | 1                | 0              | 2.706189                | -1.453875 | 4.482855  |
| 43               | 1                | 0              | 3.395700                | -1.359275 | 2.844786  |
| 44               | 1                | 0              | -2.133469               | -3.007574 | 5.191351  |
| 45               | 1                | 0              | -2.668777               | -1.445123 | 4.542657  |
| 46               | 1                | 0              | -2.734785               | -2.891666 | 3.518009  |
| 47               | 1                | 0              | -0.499145               | -4.031502 | 2.819801  |
| 48               | 1                | 0              | 1.030361                | -3.189533 | 3.134004  |
| 49               | 1                | 0              | 0.150524                | -3.969866 | 4.471737  |
| 50               | 8                | 0              | -1.065483               | 1.210791  | 1.438975  |
| 51               | 6                | 0              | -2.075674               | 1.738407  | 2.333927  |



|     |    |   |           |           |           |
|-----|----|---|-----------|-----------|-----------|
| 52  | 6  | 0 | -1.502023 | 1.936972  | 3.735774  |
| 53  | 6  | 0 | -3.324406 | 0.861971  | 2.318754  |
| 54  | 1  | 0 | -2.332750 | 2.722734  | 1.927884  |
| 55  | 1  | 0 | -2.243468 | 2.437028  | 4.370476  |
| 56  | 1  | 0 | -1.245718 | 0.979215  | 4.199830  |
| 57  | 1  | 0 | -0.600748 | 2.556534  | 3.702070  |
| 58  | 1  | 0 | -4.098645 | 1.304710  | 2.957971  |
| 59  | 1  | 0 | -3.716420 | 0.780359  | 1.303344  |
| 60  | 1  | 0 | -3.096826 | -0.142218 | 2.682559  |
| 61  | 6  | 0 | 3.180983  | 0.215488  | -0.249019 |
| 62  | 6  | 0 | 4.546820  | 0.539474  | 0.082857  |
| 63  | 6  | 0 | 4.881428  | 1.864984  | 0.515791  |
| 64  | 6  | 0 | 3.838754  | 2.820229  | 0.652329  |
| 65  | 6  | 0 | 2.529516  | 2.470829  | 0.446793  |
| 66  | 6  | 0 | 2.179047  | 1.154210  | 0.025273  |
| 67  | 6  | 0 | 5.598145  | -0.420519 | 0.039144  |
| 68  | 6  | 0 | 6.894297  | -0.083566 | 0.365613  |
| 69  | 6  | 0 | 7.222596  | 1.236534  | 0.750194  |
| 70  | 6  | 0 | 6.228713  | 2.186095  | 0.825667  |
| 71  | 1  | 0 | 5.367666  | -1.441244 | -0.244620 |
| 72  | 1  | 0 | 7.670946  | -0.843312 | 0.330406  |
| 73  | 1  | 0 | 8.249436  | 1.492932  | 0.996425  |
| 74  | 1  | 0 | 6.458366  | 3.202194  | 1.139459  |
| 75  | 1  | 0 | 4.091032  | 3.833300  | 0.958949  |
| 76  | 1  | 0 | 1.721074  | 3.178760  | 0.584299  |
| 77  | 8  | 0 | 0.862820  | 0.822235  | -0.063684 |
| 78  | 1  | 0 | -2.668775 | -4.013155 | 0.262603  |
| 79  | 22 | 0 | -0.972522 | 1.954949  | -0.542479 |
| 80  | 8  | 0 | -0.492931 | 1.861885  | -2.280559 |
| 81  | 8  | 0 | -0.342315 | 3.578828  | -0.012297 |
| 82  | 8  | 0 | -2.694550 | 2.499868  | -0.675118 |
| 83  | 6  | 0 | 0.228547  | 1.077352  | -3.212975 |
| 84  | 6  | 0 | -0.731966 | 0.524910  | -4.269165 |
| 85  | 6  | 0 | 1.344285  | 1.923838  | -3.829872 |
| 86  | 6  | 0 | -3.837270 | 2.445879  | -1.514076 |
| 87  | 6  | 0 | -5.062946 | 2.910185  | -0.725280 |
| 88  | 6  | 0 | -3.605723 | 3.288216  | -2.770831 |
| 89  | 6  | 0 | -0.760365 | 4.918602  | -0.208044 |
| 90  | 6  | 0 | -0.453637 | 5.729535  | 1.052971  |
| 91  | 6  | 0 | -0.086779 | 5.500392  | -1.453111 |
| 92  | 1  | 0 | 0.681904  | 0.235911  | -2.671356 |
| 93  | 1  | 0 | -1.526862 | -0.056122 | -3.792301 |
| 94  | 1  | 0 | -1.192143 | 1.342613  | -4.836639 |
| 95  | 1  | 0 | -0.197189 | -0.124015 | -4.973509 |
| 96  | 1  | 0 | 1.945450  | 1.323852  | -4.523535 |
| 97  | 1  | 0 | 0.920990  | 2.772979  | -4.379659 |
| 98  | 1  | 0 | 2.004660  | 2.313474  | -3.049037 |
| 99  | 1  | 0 | -3.986496 | 1.397681  | -1.810698 |
| 100 | 1  | 0 | -5.966071 | 2.837651  | -1.342706 |
| 101 | 1  | 0 | -5.208886 | 2.291693  | 0.165178  |
| 102 | 1  | 0 | -4.941135 | 3.952843  | -0.408128 |
| 103 | 1  | 0 | -2.690303 | 2.968722  | -3.275232 |
| 104 | 1  | 0 | -3.505788 | 4.348541  | -2.508252 |
| 105 | 1  | 0 | -4.448547 | 3.184252  | -3.465106 |
| 106 | 1  | 0 | -1.850134 | 4.904955  | -0.365704 |
| 107 | 1  | 0 | -0.815289 | 6.759843  | 0.950062  |
| 108 | 1  | 0 | -0.936699 | 5.278917  | 1.926396  |
| 109 | 1  | 0 | 0.626929  | 5.762194  | 1.237395  |
| 110 | 1  | 0 | 1.001124  | 5.534085  | -1.320315 |
| 111 | 1  | 0 | -0.304576 | 4.878998  | -2.326828 |
| 112 | 1  | 0 | -0.442737 | 6.519648  | -1.647592 |
| 113 | 6  | 0 | -7.866499 | -0.431391 | -0.937820 |
| 114 | 6  | 0 | -7.362649 | -0.853378 | 0.294977  |
| 115 | 6  | 0 | -6.138807 | -1.519225 | 0.361662  |
| 116 | 6  | 0 | -7.143067 | -0.679398 | -2.107582 |
| 117 | 6  | 0 | -5.918911 | -1.343384 | -2.040225 |
| 118 | 6  | 0 | -5.409356 | -1.761564 | -0.806149 |
| 119 | 6  | 0 | -4.113002 | -2.520751 | -0.735895 |
| 120 | 8  | 0 | -3.835833 | -3.166546 | 0.329013  |
| 121 | 1  | 0 | -8.821758 | 0.084583  | -0.988448 |

|     |   |   |           |           |           |
|-----|---|---|-----------|-----------|-----------|
| 122 | 1 | 0 | -7.926830 | -0.666659 | 1.205064  |
| 123 | 1 | 0 | -5.737372 | -1.868403 | 1.307275  |
| 124 | 1 | 0 | -7.534566 | -0.359403 | -3.069616 |
| 125 | 1 | 0 | -5.351432 | -1.535679 | -2.948842 |
| 126 | 1 | 0 | -3.814394 | -2.947643 | -1.707595 |

-----  
E<sub>ZPE</sub>: B3LYP/6-31G\* = -4444.698899 (a.u.)  
Gsol: B3LYP/6-311++G\*\*/(SMD,M06-2X/6-31G\*,CH2Cl2) = -4445.67330 (a.u.)

**TS<sub>20</sub>**

Standard orientation:

| Center Number | Atomic Number | Atomic Type | Coordinates (Angstroms) |           |           |
|---------------|---------------|-------------|-------------------------|-----------|-----------|
|               |               |             | X                       | Y         | Z         |
| 1             | 6             | 0           | -2.837113               | -0.979080 | -0.576654 |
| 2             | 7             | 0           | -1.941903               | -0.230198 | -0.682384 |
| 3             | 6             | 0           | 2.394794                | -3.625166 | -1.942757 |
| 4             | 6             | 0           | 3.401413                | -2.802130 | -2.496979 |
| 5             | 6             | 0           | 3.608189                | -1.496915 | -1.938678 |
| 6             | 6             | 0           | 2.886008                | -1.084899 | -0.761134 |
| 7             | 6             | 0           | 1.874341                | -1.909423 | -0.248352 |
| 8             | 6             | 0           | 1.644047                | -3.175344 | -0.887857 |
| 9             | 6             | 0           | 4.520473                | -0.639602 | -2.621240 |
| 10            | 6             | 0           | 5.209178                | -1.063774 | -3.735861 |
| 11            | 6             | 0           | 5.036477                | -2.372914 | -4.244247 |
| 12            | 6             | 0           | 4.140726                | -3.219616 | -3.636067 |
| 13            | 1             | 0           | 2.169393                | -4.585176 | -2.399918 |
| 14            | 1             | 0           | 3.968001                | -4.219241 | -4.028603 |
| 15            | 1             | 0           | 5.593559                | -2.695842 | -5.119188 |
| 16            | 1             | 0           | 5.890765                | -0.379798 | -4.234404 |
| 17            | 1             | 0           | 4.663768                | 0.370654  | -2.259446 |
| 18            | 7             | 0           | 0.503355                | -3.942267 | -0.475466 |
| 19            | 8             | 0           | 1.132334                | -1.613649 | 0.812910  |
| 20            | 22            | 0           | 0.189039                | -0.132319 | 1.618185  |
| 21            | 8             | 0           | -1.027577               | -1.179052 | 2.473249  |
| 22            | 8             | 0           | 1.254104                | 0.296053  | 2.957195  |
| 23            | 6             | 0           | 0.430946                | -5.243365 | -0.001326 |
| 24            | 6             | 0           | -0.897991               | -5.523920 | 0.165007  |
| 25            | 7             | 0           | -1.613843               | -4.403669 | -0.203925 |
| 26            | 6             | 0           | -0.748518               | -3.473995 | -0.583380 |
| 27            | 1             | 0           | 1.318692                | -5.828623 | 0.178248  |
| 28            | 1             | 0           | -1.379984               | -6.423727 | 0.514171  |
| 29            | 1             | 0           | -1.002795               | -2.483816 | -0.926410 |
| 30            | 6             | 0           | 2.534468                | 0.342686  | 3.586590  |
| 31            | 6             | 0           | 2.405403                | 1.105684  | 4.903687  |
| 32            | 6             | 0           | 3.079121                | -1.072615 | 3.769552  |
| 33            | 1             | 0           | 3.195905                | 0.898696  | 2.912749  |
| 34            | 6             | 0           | -0.965650               | -1.943682 | 3.674625  |
| 35            | 6             | 0           | -2.333471               | -1.939681 | 4.358503  |
| 36            | 6             | 0           | -0.485837               | -3.362368 | 3.364257  |
| 37            | 1             | 0           | -0.235727               | -1.462696 | 4.343306  |
| 38            | 1             | 0           | 1.739346                | 0.576196  | 5.594734  |
| 39            | 1             | 0           | 3.388008                | 1.206511  | 5.378839  |
| 40            | 1             | 0           | 2.000185                | 2.107393  | 4.731873  |
| 41            | 1             | 0           | 4.092177                | -1.034665 | 4.185933  |
| 42            | 1             | 0           | 2.443744                | -1.646684 | 4.454369  |
| 43            | 1             | 0           | 3.117573                | -1.593335 | 2.809125  |
| 44            | 1             | 0           | -2.297616               | -2.521266 | 5.287566  |
| 45            | 1             | 0           | -2.646440               | -0.920701 | 4.605224  |
| 46            | 1             | 0           | -3.092244               | -2.385155 | 3.704203  |
| 47            | 1             | 0           | -1.208364               | -3.875562 | 2.719914  |
| 48            | 1             | 0           | 0.476586                | -3.336010 | 2.846203  |
| 49            | 1             | 0           | -0.375178               | -3.941989 | 4.288888  |
| 50            | 8             | 0           | -0.984379               | 1.435740  | 1.356017  |
| 51            | 6             | 0           | -1.883758               | 2.135685  | 2.242222  |
| 52            | 6             | 0           | -1.228404               | 2.372079  | 3.601436  |
| 53            | 6             | 0           | -3.221079               | 1.407857  | 2.350246  |
| 54            | 1             | 0           | -2.053692               | 3.110929  | 1.771702  |
| 55            | 1             | 0           | -1.881635               | 2.995019  | 4.224273  |

|     |    |   |           |           |           |
|-----|----|---|-----------|-----------|-----------|
| 56  | 1  | 0 | -1.050329 | 1.428484  | 4.127150  |
| 57  | 1  | 0 | -0.269229 | 2.885159  | 3.484048  |
| 58  | 1  | 0 | -3.912951 | 1.983468  | 2.978003  |
| 59  | 1  | 0 | -3.662634 | 1.291055  | 1.358877  |
| 60  | 1  | 0 | -3.084994 | 0.416954  | 2.790517  |
| 61  | 6  | 0 | 3.179555  | 0.224858  | -0.120495 |
| 62  | 6  | 0 | 4.513758  | 0.557875  | 0.315189  |
| 63  | 6  | 0 | 4.805663  | 1.888369  | 0.763536  |
| 64  | 6  | 0 | 3.748865  | 2.836409  | 0.818156  |
| 65  | 6  | 0 | 2.461943  | 2.480805  | 0.508768  |
| 66  | 6  | 0 | 2.155313  | 1.162596  | 0.057248  |
| 67  | 6  | 0 | 5.570876  | -0.395598 | 0.359958  |
| 68  | 6  | 0 | 6.836271  | -0.047327 | 0.781401  |
| 69  | 6  | 0 | 7.126129  | 1.277761  | 1.179582  |
| 70  | 6  | 0 | 6.123270  | 2.220881  | 1.173065  |
| 71  | 1  | 0 | 5.369390  | -1.419617 | 0.066477  |
| 72  | 1  | 0 | 7.618265  | -0.801808 | 0.810708  |
| 73  | 1  | 0 | 8.129741  | 1.542910  | 1.500804  |
| 74  | 1  | 0 | 6.321561  | 3.240364  | 1.496933  |
| 75  | 1  | 0 | 3.970233  | 3.850981  | 1.142959  |
| 76  | 1  | 0 | 1.645063  | 3.188589  | 0.577447  |
| 77  | 8  | 0 | 0.857865  | 0.815292  | -0.158019 |
| 78  | 22 | 0 | -0.945814 | 1.953247  | -0.708082 |
| 79  | 8  | 0 | -0.503265 | 1.653794  | -2.432290 |
| 80  | 8  | 0 | -0.277763 | 3.613327  | -0.378922 |
| 81  | 8  | 0 | -2.662410 | 2.498158  | -0.868067 |
| 82  | 6  | 0 | 0.255072  | 0.793623  | -3.263692 |
| 83  | 6  | 0 | -0.669216 | 0.120876  | -4.281421 |
| 84  | 6  | 0 | 1.374185  | 1.592139  | -3.936185 |
| 85  | 6  | 0 | -3.886917 | 2.349881  | -1.565225 |
| 86  | 6  | 0 | -4.965916 | 3.179700  | -0.865489 |
| 87  | 6  | 0 | -3.719542 | 2.748151  | -3.032815 |
| 88  | 6  | 0 | -0.627035 | 4.917244  | -0.814060 |
| 89  | 6  | 0 | -0.393167 | 5.906551  | 0.329639  |
| 90  | 6  | 0 | 0.167448  | 5.280950  | -2.070304 |
| 91  | 1  | 0 | 0.708872  | 0.020772  | -2.628786 |
| 92  | 1  | 0 | -1.471841 | -0.419549 | -3.769971 |
| 93  | 1  | 0 | -1.122730 | 0.868234  | -4.943407 |
| 94  | 1  | 0 | -0.107980 | -0.589976 | -4.900313 |
| 95  | 1  | 0 | 2.002772  | 0.934893  | -4.548801 |
| 96  | 1  | 0 | 0.953966  | 2.373118  | -4.581125 |
| 97  | 1  | 0 | 2.008157  | 2.070946  | -3.183422 |
| 98  | 1  | 0 | -4.170026 | 1.288134  | -1.516539 |
| 99  | 1  | 0 | -5.936168 | 3.040163  | -1.356649 |
| 100 | 1  | 0 | -5.067026 | 2.882783  | 0.182910  |
| 101 | 1  | 0 | -4.709310 | 4.245272  | -0.898424 |
| 102 | 1  | 0 | -2.915474 | 2.171573  | -3.495988 |
| 103 | 1  | 0 | -3.470943 | 3.813440  | -3.114280 |
| 104 | 1  | 0 | -4.649346 | 2.567684  | -3.585625 |
| 105 | 1  | 0 | -1.700386 | 4.907175  | -1.059556 |
| 106 | 1  | 0 | -0.704685 | 6.917085  | 0.038701  |
| 107 | 1  | 0 | -0.963819 | 5.610942  | 1.216397  |
| 108 | 1  | 0 | 0.669163  | 5.939869  | 0.599825  |
| 109 | 1  | 0 | 1.240677  | 5.315052  | -1.848300 |
| 110 | 1  | 0 | 0.003454  | 4.533366  | -2.851894 |
| 111 | 1  | 0 | -0.137721 | 6.263001  | -2.452242 |
| 112 | 1  | 0 | -2.728169 | -4.128789 | -0.292354 |
| 113 | 6  | 0 | -7.934430 | -0.512604 | -0.752859 |
| 114 | 6  | 0 | -7.411006 | -1.422705 | -1.675747 |
| 115 | 6  | 0 | -6.178199 | -2.028394 | -1.440207 |
| 116 | 6  | 0 | -7.221133 | -0.212042 | 0.409677  |
| 117 | 6  | 0 | -5.985329 | -0.815590 | 0.643758  |
| 118 | 6  | 0 | -5.455733 | -1.720737 | -0.282165 |
| 119 | 6  | 0 | -4.147766 | -2.404776 | -0.012993 |
| 120 | 8  | 0 | -3.904228 | -3.500695 | -0.621455 |
| 121 | 1  | 0 | -8.897571 | -0.043667 | -0.936771 |
| 122 | 1  | 0 | -7.967991 | -1.662548 | -2.577792 |
| 123 | 1  | 0 | -5.762810 | -2.748595 | -2.137657 |
| 124 | 1  | 0 | -7.628052 | 0.488132  | 1.134320  |
| 125 | 1  | 0 | -5.428086 | -0.583729 | 1.548395  |

126 1 0 -3.787052 -2.278030 1.019854

-----  
E<sub>ZPE</sub>: B3LYP/6-31G\* = -4444.697940 (a.u.)  
Gsol: B3LYP/6-311++G\*\*/(SMD,M06-2X/6-31G\*,CH2Cl2) = -4445.67144 (a.u.)

#### Full citation of reference 14

14 (a) M. J. Frisch, G. W. Trucks, H. B. Schlegel, G. E. Scuseria, M. A. Robb, J. R. Cheeseman, J. A. Montgomery, Jr., T. Vreven, K. N. Kudin, J. C. Burant, J. M. Millam, S. S. Iyengar, J. Tomasi, V. Barone, B. Mennucci, M. Cossi, G. Scalmani, N. Rega, G. A. Petersson, H. Nakatsuji, M. Hada, M. Ehara, K. Toyota, R. Fukuda, J. Hasegawa, M. Ishida, T. Nakajima, Y. Honda, O. Kitao, H. Nakai, M. Klene, X. Li, J. E. Knox, H. P. Hratchian, J. B. Cross, V. Bakken, C. Adamo, J. Jaramillo, R. Gomperts, R. E. Stratmann, O. Yazyev, A. J. Austin, R. Cammi, C. Pomelli, J. W. Ochterski, P. Y. Ayala, K. Morokuma, G. A. Voth, P. Salvador, J. J. Dannenberg, V. G. Zakrzewski, S. Dapprich, A. D. Daniels, M. C. Strain, O. Farkas, D. K. Malick, A. D. Rabuck, K. Raghavachari, J. B. Foresman, J. V. Ortiz, Q. Cui, A. G. Baboul, S. Clifford, J. Cioslowski, B. B. Stefanov, G. Liu, A. Liashenko, P. Piskorz, I. Komaromi, R. L. Martin, D. J. Fox, T. Keith, M. A. Al-Laham, C. Y. Peng, A. Nanayakkara, M. Challacombe, P. M. W. Gill, B. Johnson, W. Chen, M. W. Wong, C. Gonzalez, and J. A. Pople, **Gaussian 03**, revision E.01, Gaussian, Inc., Wallingford CT, 2004. (b) M. J. Frisch, G. W. Trucks, H. B. Schlegel, G. E. Scuseria, M. A. Robb, J. R. Cheeseman, G. Scalmani, V. Barone, B. Mennucci, G. A. Petersson, H. Nakatsuji, M. Caricato, X. Li, H. P. Hratchian, A. F. Izmaylov, J. Bloino, G. Zheng, J. L. Sonnenberg, M. Hada, M. Ehara, K. Toyota, R. Fukuda, J. Hasegawa, M. Ishida, T. Nakajima, Y. Honda, O. Kitao, H. Nakai, T. Vreven, J. A. Montgomery, Jr., J. E. Peralta, F. Ogliaro, M. Bearpark, J. J. Heyd, E. Brothers, K. N. Kudin, V. N. Staroverov, R. Kobayashi, J. Normand, K. Raghavachari, A. Rendell, J. C. Burant, S. S. Iyengar, J. Tomasi, M. Cossi, N. Rega, J. M. Millam, M. Klene, J. E. Knox, J. B. Cross, V. Bakken, C. Adamo, J. Jaramillo, R. Gomperts, R. E. Stratmann, O. Yazyev, A. J. Austin, R. Cammi, C. Pomelli, J. W. Ochterski, R. L. Martin, K. Morokuma, V. G. Zakrzewski, G. A. Voth, P. Salvador, J. J. Dannenberg, S. Dapprich, A. D. Daniels, O. Farkas, J. B. Foresman, J. V. Ortiz, J. Cioslowski, and D. J. Fox, **Gaussian 09**, revision A.01, Gaussian, Inc., Wallingford CT, 2009.
